1 Genome-wide sequence-based genotyping supports a nonhybrid origin of *Castanea alabamensis*

2 M. Taylor Perkins<sup>1,4</sup>, Tetyana Zhebentyayeva<sup>2</sup>, Paul H. Sisco<sup>3</sup>, J. Hill Craddock<sup>1,5</sup>

3 <sup>1</sup>Department of Biology, Geology, and Environmental Science, The University of Tennessee at

4 Chattanooga, Chattanooga, TN 37403, USA; <sup>2</sup>Department of Ecosystem Science and

5 Management, The Pennsylvania State University, University Park, PA 16802, USA; <sup>3</sup>The

6 American Chestnut Foundation, Carolinas Chapter, Asheville, NC 28804, USA; <sup>4</sup>Current

7 address: Department of Plant Sciences, University of California, Davis, CA 95616, USA;

8 <sup>5</sup>Author for correspondence (e-mail: hill-craddock@utc.edu)

9 Short title: Nonhybrid origin of *Castanea alabamensis*

10 Abstract: The genus *Castanea* in North America contains multiple tree and shrub taxa of  
11 conservation concern. The two species within the group, American chestnut (*Castanea dentata*)  
12 and chinquapin (*C. pumila* sensu lato), display remarkable morphological diversity across their  
13 distributions in the eastern United States and southern Ontario. Previous investigators have  
14 hypothesized that hybridization between *C. dentata* and *C. pumila* has played an important role  
15 in generating morphological variation in wild populations. A putative hybrid taxon, *Castanea*  
16 *alabamensis*, was identified in northern Alabama in the early 20th century; however, the  
17 question of its hybridity has been unresolved. We tested the hypothesized hybrid origin of *C.*  
18 *alabamensis* using genome-wide sequence-based genotyping of *C. alabamensis*, all currently  
19 recognized North American *Castanea* taxa, and two Asian *Castanea* species at >100,000 single-  
20 nucleotide polymorphism (SNP) loci. With these data, we generated a high-resolution  
21 phylogeny, tested for admixture among taxa, and analyzed population genetic structure of the  
22 study taxa. Bayesian clustering and principal components analysis provided no evidence of

23 admixture between *C. dentata* and *C. pumila* in *C. alabamensis* genomes. Phylogenetic analysis  
24 of genome-wide SNP data indicated that *C. alabamensis* forms a distinct group within *C. pumila*  
25 sensu lato. Our results are consistent with the model of a nonhybrid origin for *C. alabamensis*.  
26 Our finding of *C. alabamensis* as a genetically and morphologically distinct group within the  
27 North American chinquapin complex provides further impetus for the study and conservation of  
28 the North American *Castanea* species.

29

30 Key words: American chestnut; *Castanea dentata*; *Castanea pumila*; chinquapin; genotyping-by-  
31 sequencing; hybridization; Fagaceae

32

33

34 Hybridization is an important and widespread phenomenon in plants (Ellstrand et al.,  
35 1996; Mallet, 2005; Soltis and Soltis, 2009; Whitney et al., 2010). Evolutionary outcomes of  
36 hybridization can include reinforcement or breakdown of reproductive barriers, increased  
37 intraspecific diversity, transfer of genetic adaptations between species, and the origin of new  
38 ecotypes or species (Rieseberg, 1997). Many authors have asserted that the descendants of  
39 natural interspecific hybridization warrant conservation because they represent a natural part of  
40 the evolutionary legacy of taxa (Whitham et al., 1991; Allendorf et al., 2001; Allendorf et al.,  
41 2013; Stronen and Paquet, 2013; Jackiw et al., 2015). Thus, the identification and  
42 characterization of natural hybrids, particularly in groups of conservation concern, is a priority  
43 for understanding and protecting plant biodiversity. The genus *Castanea* Mill. (Fagaceae) in  
44 North America exemplifies this concept.

45 There exists remarkable morphological diversity within the North American *Castanea*, a  
46 group that is thought to be comprised of just two species, American chestnut (*Castanea dentata*  
47 (Marsh.) Borkh.) and North American chinquapin (*C. pumila* (L.) Mill.) (Johnson, 1988). Within  
48 *C. pumila* alone, plant habit at maturity varies from rhizomatous subshrub in some populations of  
49 the Gulf Coastal Plain to canopy tree in other populations (Johnson, 1988; Nixon, 1997). Such  
50 variation in plant habit, as well as variation in flower, fruit, leaf, and twig morphology has led  
51 several authors to speculate that hybridization between *C. dentata* and *C. pumila* has contributed  
52 significantly to the variation observed in wild North American *Castanea* populations (Dode,  
53 1908; Camus, 1929; Elias, 1971; Little, 1979; Nixon, 1997; Kubisiak and Roberds, 2006;  
54 Binkley, 2008; Shaw et al., 2012; Li and Dane, 2013). Reports of naturally occurring hybrids  
55 between *C. dentata* and *C. pumila* var. *pumila* have resulted in the description of two hybrid  
56 taxa. Dode (1908) published the first description of putative hybrid progeny of *C. dentata* and *C.*

57 *pumila*, referring to these plants from North Carolina, Virginia, and Maryland as *C. × neglecta*  
58 Dode. The second hybrid taxon resulted from Camus' (1929) revised treatment of the nonhybrid  
59 species *C. alabamensis* Ashe, a tree endemic to the Appalachian Mountains of northern  
60 Alabama. The putative hybrid taxa, *C. alabamensis* and *C. × neglecta*, both possess a  
61 combination of traits typically used to differentiate *C. dentata* from *C. pumila*. In *C.*  
62 *alabamensis*, specifically, plants produce one pistillate flower per cupule and one nut per bur,  
63 like *C. pumila*, yet mature plants grow as medium to large trees, have glabrous twigs, and have  
64 apparently glabrous abaxial leaf surfaces when viewed without magnification, like *C. dentata*  
65 with which they are sympatric (Ashe, 1925).

66 Multiple genetic studies over the past decade have investigated the putative hybridity of  
67 several North American *Castanea* populations (Binkley, 2008; Dane, 2009; Shaw et al., 2012; Li  
68 and Dane, 2013). Binkley (2008) and Shaw et al. (2012) used a small number of noncoding  
69 cpDNA regions to investigate populations of suspected hybrids in northwestern Georgia, which  
70 they described as having an “intermediate morphology” that corresponded to the hybrid taxon *C.*  
71 *× neglecta*. Their *C. × neglecta* accessions had a unique cpDNA haplotype that was not found in  
72 a diverse panel of the putative parental species, *C. dentata* and *C. pumila*, contrary what they  
73 predicted would have been observed in hybrid individuals. Authors of both studies concluded  
74 that further investigation would be needed to rigorously test the hybridity of their study  
75 populations in northwestern Georgia (Binkley, 2008; Shaw et al., 2012). The most recent study  
76 of reputed naturally-occurring hybrids between *C. dentata* and *C. pumila* used six noncoding  
77 cpDNA regions and 680 bp from two nuclear DNA regions to investigate the extent of  
78 hybridization between these two species (Li and Dane, 2013). An important finding of Li and  
79 Dane (2013) related to their discovery of two different morphological groups at a site in northern

80 Alabama, which they designated as distinct morphological types of *C. dentata*: Type I *C. dentata*  
81 (possessing morphological features typical of *C. dentata* throughout its range) and Type II *C.*  
82 *dentata* (possessing several leaf trichome features that the authors described as indicative of  
83 morphological intermediacy between *C. dentata* and *C. pumila*). In phylogenetic analyses of  
84 cpDNA and nuclear DNA sequences, Type I *C. dentata* grouped with other *C. dentata* plants  
85 sampled throughout the species' range, while Type II *C. dentata* grouped with *C. pumila* in  
86 analyses of both chloroplast and nuclear DNA datasets. Li and Dane (2013) concluded that the  
87 genetic and morphological patterns observed in Type II *C. dentata* might be the result of past  
88 hybridization between *C. dentata* and *C. pumila*.

89         A limitation of previous genetic studies of putative hybrids between *C. dentata* and *C.*  
90 *pumila* is that nearly all of the analyses relied principally on datasets comprised of information  
91 from a small number of maternally-inherited cpDNA loci. In the few cases where loci from the  
92 nuclear genome were analyzed, these data were not tested for signatures of hybridization.  
93 Although, Li and Dane (2013) used both cpDNA and nuclear DNA, results of their analysis of  
94 680 bp from two nuclear loci showed no genetic evidence of *C. dentata* ancestry in their Type II  
95 *C. dentata* individuals. Their dataset also lacked the information necessary to more finely discern  
96 relationships between different putatively hybridized Type II *C. dentata* individuals and the *C.*  
97 *pumila* individuals found on the same branch of the phylogenetic tree. Moreover, analytical  
98 methods used to make inferences about past hybridization in this group have been limited to  
99 phylogenetic trees and cpDNA haplotype networks, using models that assume a strictly  
100 bifurcating pattern of lineage evolution (Binkley, 2008; Dane, 2009; Shaw et al., 2012; Li and  
101 Dane, 2013). Therefore, despite much speculation, convincing evidence regarding the occurrence

102 or extent of natural hybridization between the North American *Castanea* taxa has not been  
103 produced.

104         The North American *Castanea* are currently thought to consist of either two or three  
105 species. The most recent formal taxonomic revision of the group relied on morphology and  
106 concluded that North American *Castanea* is comprised of two species, American chestnut (*C.*  
107 *dentata*) and North American chinquapin (*Castanea pumila*)—the latter species containing the  
108 botanical varieties Allegheny chinquapin (*C. pumila* (L.) Mill. var. *pumila*) and Ozark  
109 chinquapin (*C. pumila* var. *ozarkensis* (Ashe) Tucker) (Johnson, 1988). Other taxonomists  
110 contend that the ecological and morphological differences between Allegheny chinquapin and  
111 Ozark chinquapin are substantial enough to justify recognition at the level of species, and they  
112 recognize three species of North American *Castanea*: *C. dentata*, *C. pumila*, and *C. ozarkensis*  
113 (Nixon, 1997; Weakley, 2015). American chestnut (*C. dentata*) produces three pistils per cupule,  
114 three nuts per bur, and apparently glabrous abaxial leaf surfaces that rarely contain stellate  
115 trichomes, and healthy individuals grow as trees at maturity (Nixon, 1997). Ozark chinquapin  
116 and Allegheny chinquapin typically produce one pistil per cupule, one nut per bur, and have sun  
117 leaves with abaxial surfaces that are covered in stellate trichomes (Johnson, 1988; Nixon, 1997).  
118 However, Ozark chinquapin grows as a tree at maturity and Allegheny chinquapin varies from  
119 rhizomatous shrub, to non-rhizomatous shrub, to small tree at maturity (Johnson, 1988). Dode  
120 (1908) describes the hybrid taxon *C. × neglecta* as having slightly pubescent twigs and leaves,  
121 reminiscent of the putative parent *C. pumila*, and larger burs and arborescent habit, like the  
122 putative parent *C. dentata*. Ashe (1925) originally described *C. alabamensis* as a distinct  
123 chinquapin species, but it was treated as a hybrid taxon throughout most of the 20<sup>th</sup> century  
124 (Camus, 1929; Elias, 1971; Little, 1979). In the most recent taxonomic revision of the group,

125 Johnson (1988) found no living plants that corresponded to the description *C. × neglecta*.  
126 Johnson (1988) treated *C. alabamensis* as a synonym of *C. pumila* var. *ozarkensis* on the basis of  
127 morphological similarities between the two taxa and, after field work near Ashe's *C.*  
128 *alabamensis* type locality in northern Alabama, he concluded that *C. pumila* var. *ozarkensis* had  
129 been extirpated from east of the Mississippi River by chestnut blight.

130         The advent of affordable genome-wide sequence-based genotyping methods has recently  
131 allowed new insights into questions of hybridization and admixture in plants (Escudero et al.,  
132 2014; Eaton et al., 2015; Baute et al., 2016; Owens et al., 2016; Leroy et al., 2017; McVay et al.,  
133 2017; Zhao et al., 2018; Turner et al., 2018). The availability of large numbers of markers  
134 distributed across the genome has allowed researchers to address questions that were previously  
135 intractable with less comprehensive datasets. Notably, these methods have allowed researchers to  
136 understand hybridization, introgression, and species boundaries on a fine scale in *Quercus*, a  
137 genus closely related to *Castanea* that is well known for a history of interspecific hybridization  
138 (Eaton et al., 2015; Leroy et al., 2017; McVay et al., 2017). Thus, genome-wide sequence-based  
139 genotyping represents a potentially useful approach for understanding hybridization and  
140 admixture in the North American *Castanea* species.

141         Here, we investigate the origins of purported hybrid populations of *Castanea* in the  
142 eastern United States. Our main objective was to test the hypothesized hybrid origin of samples  
143 corresponding to the morphological description of *C. alabamensis*. A secondary objective was to  
144 test for admixture in sympatric populations of *C. dentata* and *C. pumila*. We used sequence-  
145 based genotyping to gather genome-wide single nucleotide polymorphism (SNP) data from  
146 samples representing *C. alabamensis*, all currently recognized North American *Castanea* taxa  
147 (*C. dentata*, *C. pumila* var. *pumila*, *C. pumila* var. *ozarkensis*) and two East Asian outgroup

148 species (*C. crenata* and *C. mollissima*). Additionally, we examined the morphology of 865  
149 herbarium accessions representing the type specimens of *C. alabamensis* and all extant *Castanea*  
150 species to place our samples in taxonomic context with recent studies of hybridization in the  
151 North American *Castanea* (Binkley, 2008; Shaw et al., 2012; Li and Dane, 2013) and earlier  
152 hypotheses based on morphology (Ashe, 1925; Camus, 1929; Elias, 1971; Little, 1979; Johnson,  
153 1988).

154

## 155 MATERIALS AND METHODS

156 *Plant materials, DNA extraction, and morphological comparisons*—Young leaf tissues  
157 for DNA extraction were collected from 106 naturally-occurring North American *Castanea* and  
158 cultivated East Asian *Castanea* plants. We sampled plants corresponding to Ashe’s (1925)  
159 description of *C. alabamensis*, the putative parent taxa, *C. dentata* and *C. pumila* var. *pumila*, the  
160 remaining North American taxon, *C. pumila* var. *ozarkensis*, and two East Asian outgroup  
161 species, *C. mollissima* Blume (Chinese chestnut) and *C. crenata* Siebold & Zucc. (Japanese  
162 chestnut) (Table 1; Appendix S1). Samples representing two of the *C. × neglecta* populations  
163 studied by Binkley (2008) and Shaw et al. (2012) were included in sequencing (Table 1;  
164 Appendix S1). Total genomic DNA was extracted from 100 mg of fresh or frozen leaf tissue  
165 using the Qiagen DNeasy Plant Mini Kit (Qiagen, Valencia, California, USA) or a modified  
166 version of the CTAB protocol of Kubisiak et al. (2013). DNA quality and integrity were  
167 examined using a NanoDrop ND-8000 spectrophotometer (Thermo Fisher Scientific Inc.,  
168 Waltham, Massachusetts, USA) and electrophoresis on 1% agarose gels. Genomic DNA was  
169 quantified using the Qubit 2.0 fluorometric quantification assay (Life Technologies, Carlsbad,  
170 California, USA).



171 Corresponding herbarium vouchers were obtained for wild-collected North American  
172 *Castanea* samples and assessed for a suite of morphological features that differentiate *C. dentata*,  
173 *C. pumila* var. *pumila*, *C. pumila* var. *ozarkensis*, and *C. alabamensis* (Table 1). Herbarium  
174 vouchers were also collected from the northern Alabama population containing the suspected  
175 hybrid “Type II *C. dentata*” studied by Li and Dane (2013) (Appendix S2). Finally,  
176 morphological comparisons were made between the genotyped plants and the entire *Castanea*  
177 collection at the University of North Carolina Chapel Hill Herbarium (NCU), which contains a  
178 total of 865 specimens representing all extant *Castanea* species and the type specimens of  
179 *C. alabamensis* (Appendix S3). Morphological features assessed included four leaf characters  
180 (sun leaf abaxial surface covered with stellate trichomes or not; simple trichomes present or  
181 absent on abaxial lamina; abaxial surface glaucous or not; leaf margin ciliate or eciliate), one  
182 twig character (twigs pubescent or not), and one flower/fruit character (pistil per cupule ratio or  
183 nut per bur ratio).

184

185

186

187

188

189

190 Table 1. Morphological and locality information for *Castanea* populations genotyped in this study. Data for numbers of pistils per  
 191 cupule and nuts per bur reflect observations from spring and fall, respectively.

| Taxon/County, State                            | Site name       | No. of plants | GBS IDs                         | Morphological features                   |                                      |                          |                     |                 | Pistils per cupule/<br>nuts per bur |
|------------------------------------------------|-----------------|---------------|---------------------------------|------------------------------------------|--------------------------------------|--------------------------|---------------------|-----------------|-------------------------------------|
|                                                |                 |               |                                 | Abaxial with abundant stellate trichomes | Simple trichomes on laminar surfaces | Glaucous abaxial surface | Ciliate leaf margin | Pubescent twigs |                                     |
| <b><i>C. pumila</i> var. <i>pumila</i></b>     |                 |               |                                 | <b>Yes</b>                               | <b>Yes</b>                           | <b>No</b>                | <b>Yes</b>          | <b>Yes</b>      | <b>1 (-3)</b>                       |
| Oconee, SC                                     | BF              | 4             | 29, 33, 37, 42                  | Yes                                      | Yes                                  | No                       | Yes                 | Yes             | NA                                  |
| Oconee, SC                                     | CR              | 5             | 15, 19, 21, 25, 30              | Yes                                      | Yes                                  | No                       | Yes                 | Yes             | NA                                  |
| Cherokee, NC                                   | SE              | 8             | 53, 54, 55, 57, 58, 60, 61, 62  | Yes                                      | Yes                                  | No                       | Yes                 | Yes             | 1                                   |
| Charleston, SC                                 | AW              | 9             | 1, 5, 9, 13, 17, 23, 28, 32, 36 | Yes                                      | Yes                                  | No                       | Yes                 | Yes             | NA                                  |
| Sumter, SC                                     | WB              | 2             | 41, 44                          | Yes                                      | Yes                                  | No                       | Yes                 | Yes             | NA                                  |
| Suwannee, FL                                   | SS              | 3             | 80, 81, 82                      | Yes                                      | Yes                                  | No                       | No                  | No              | 1,2,3                               |
| Transylvania, NC                               | GO              | 2             | 20, 24                          | Yes                                      | Yes                                  | No                       | Yes                 | Yes             | NA                                  |
| Baker, GA                                      | JR              | 1             | 26                              | Yes                                      | Yes                                  | No                       | Yes                 | Yes             | 1                                   |
| Pickens, GA                                    | TM              | 6             | 35, 40, 43, 46, 47, 48          | Yes                                      | Yes                                  | No                       | Yes                 | Yes             | 1                                   |
| <b><i>C. pumila</i> var. <i>ozarkensis</i></b> |                 |               |                                 | <b>Yes</b>                               | <b>Yes</b>                           | <b>No</b>                | <b>Yes</b>          | <b>No</b>       | <b>1</b>                            |
| Lawrence, MO                                   | MO              | 1             | 63                              | Yes                                      | Yes                                  | No                       | Yes                 | No              | 1                                   |
| Sharp, AR                                      | SH              | 1             | 64                              | Yes                                      | Yes                                  | No                       | Yes                 | No              | 1                                   |
| <b><i>C. alabamensis</i></b>                   |                 |               |                                 | <b>No</b>                                | <b>Yes</b>                           | <b>Yes</b>               | <b>Yes</b>          | <b>No</b>       | <b>1</b>                            |
| Cleburne, AL                                   | HU              | 3             | 67, 86, 89                      | No                                       | Yes                                  | Yes                      | Yes                 | No              | 1                                   |
| Clay, AL                                       | AG              | 5             | 73, 75, 76, 85, 87              | No                                       | Yes                                  | Yes                      | Yes                 | No              | 1                                   |
| Calhoun, AL                                    | CH              | 6             | 90, 92, 93, 94, 95, 96          | No                                       | Yes                                  | Yes                      | Yes                 | No              | 1                                   |
| Floyd, GA                                      | JM <sup>†</sup> | 1             | 22                              | No                                       | Yes                                  | Yes                      | Yes                 | No              | 1                                   |
| Floyd, GA                                      | PO <sup>†</sup> | 1             | 38                              | No                                       | Yes                                  | Yes                      | Yes                 | No              | 1                                   |
| <b><i>C. dentata</i></b>                       |                 |               |                                 | <b>No</b>                                | <b>No</b>                            | <b>No</b>                | <b>No</b>           | <b>No</b>       | <b>3</b>                            |
| Cleburne, AL                                   | HU              | 3             | 68, 69, 70                      | No                                       | No                                   | No                       | No                  | No              | NA                                  |
| Clay, AL                                       | AG              | 2             | 74, 77                          | No                                       | No                                   | No                       | No                  | No              | NA                                  |
| Calhoun, AL                                    | CH              | 1             | 91                              | No                                       | No                                   | No                       | No                  | No              | NA                                  |
| Cleburne, AL                                   | FR              | 3             | 71, 72, 84                      | No                                       | No                                   | No                       | No                  | No              | NA                                  |
| Morgan, AL                                     | LA              | 3             | 78, 79, 88                      | No                                       | No                                   | No                       | No                  | No              | NA                                  |
| Pickens, GA                                    | TM              | 2             | 27, 31                          | No                                       | No                                   | No                       | No                  | No              | NA                                  |
| Lincoln, TN                                    | LI              | 1             | 83                              | No                                       | No                                   | No                       | No                  | No              | 3                                   |
| Oconee, SC                                     | BF              | 2             | 3, 45                           | No                                       | No                                   | No                       | No                  | No              | NA                                  |
| Oconee, SC                                     | CR              | 2             | 7, 11                           | No                                       | No                                   | No                       | No                  | No              | NA                                  |
| Pickens, SC                                    | CE              | 4             | 2, 6, 10, 14                    | No                                       | No                                   | No                       | No                  | No              | NA                                  |
| Transylvania, NC                               | GO              | 1             | 18                              | No                                       | No                                   | No                       | No                  | No              | NA                                  |

|                             |    |   |            |           |           |           |           |           |          |
|-----------------------------|----|---|------------|-----------|-----------|-----------|-----------|-----------|----------|
| Cherokee, NC                | JB | 3 | 50, 51, 52 | No        | No        | No        | No        | No        | NA       |
| Cherokee, NC                | SE | 1 | 59         | No        | No        | No        | No        | No        | NA       |
| Buncombe, NC                | DO | 1 | 102        | No        | No        | No        | No        | No        | 3        |
| Avery, NC                   | CB | 1 | 103        | No        | No        | No        | No        | No        | 3        |
| Washington, VA              | WN | 1 | 97         | No        | No        | No        | No        | No        | 3        |
| Adair, KY                   | KY | 1 | 16         | NA        | NA        | NA        | NA        | NA        | NA       |
| Westmoreland, PA            | WE | 1 | 12         | No        | No        | No        | No        | No        | NA       |
| Warren, PA                  | WR | 1 | 8          | No        | No        | No        | No        | No        | NA       |
| Huntingdon, PA              | RO | 1 | 4          | No        | No        | No        | No        | No        | NA       |
| Knox, ME                    | KN | 1 | 34         | No        | No        | No        | No        | No        | NA       |
| Piscataquis, ME             | AT | 1 | 39         | No        | No        | No        | No        | No        | NA       |
| Piscataquis, ME             | SB | 1 | 66         | No        | No        | No        | No        | No        | NA       |
| Waldo, ME                   | WA | 1 | 65         | No        | No        | No        | No        | No        | NA       |
| <b><i>C. mollissima</i></b> |    |   |            | <b>NA</b> | <b>NA</b> | <b>NA</b> | <b>NA</b> | <b>NA</b> | <b>3</b> |
| 'Nanking'                   | NK | 1 | 100        | NA        | NA        | NA        | NA        | NA        | 3        |
| 'Mahogany'                  | MY | 1 | 98         | NA        | NA        | NA        | NA        | NA        | 3        |
| <b><i>C. crenata</i></b>    |    |   |            | <b>NA</b> | <b>NA</b> | <b>NA</b> | <b>NA</b> | <b>NA</b> | <b>3</b> |
| 'Fort Defiance'             | FD | 1 | 104        | NA        | NA        | NA        | NA        | NA        | 3        |
| 'Morrow Mountain'           | MM | 1 | 107        | NA        | NA        | NA        | NA        | NA        | 3        |
| 'Rita 1'                    | RI | 1 | 108        | NA        | NA        | NA        | NA        | NA        | NA       |
| 'Rita 2'                    | RA | 1 | 110        | NA        | NA        | NA        | NA        | NA        | NA       |

192 Note: NA = character was not observed in the individual or species; † = samples 22 and 38, from the JM and PO sites, were previously  
193 identified as *C. × neglecta* and sequenced in the studies of Binkley (2008) and Shaw et al. (2012).  
194

195

196

197

198

199

200 ***GBS library construction, data processing, and SNP discovery***—Genotyping-by-  
201 sequencing (GBS) libraries were prepared using a modified version of the methods of Elshire et  
202 al. (2011), as described by Zhebentyayeva et al. (2019). We followed all aspects of the GBS  
203 library preparation protocol of Zhebentyayeva et al. (2019), with one exception—we double-  
204 digested DNA samples with *Pst*I and *Mse*I. Briefly, we performed double digestion of DNA  
205 samples, ligated fragments to Illumina sequencing adapters and custom barcoded adapters (see  
206 Appendix S4 for barcode sequences), pooled samples, then purified the pooled samples using a  
207 QIAquick PCR purification kit (Qiagen, Valencia, California, USA). Pooled samples were  
208 amplified using 18 cycles of PCR and size-selection was performed using 0.4× and 0.8× volumes  
209 of Mag-Bind Total Pure NGS magnetic beads (Omega Bio-Tek, Georgia, USA) to remove  
210 fragments larger than 1.5 kb and smaller than 121 bp, respectively. The quality of GBS libraries  
211 was validated using a 2100 Bioanalyzer (Agilent Genomics, Santa Clara, California, USA). 96-  
212 plex GBS libraries were paired-end sequenced (2 × 125 bp) on an Illumina HiSeq 2500 (Illumina  
213 Inc., San Diego, California, USA) at the Hollings Cancer Center at the Medical University of  
214 South Carolina.

215 Data processing of Illumina reads was performed using Clemson University's Palmetto  
216 Cluster high-performance computing resource as described by Zhebentyayeva et al. (2019).  
217 Default settings of the Stacks 1.45 program 'process\_radtags' (Catchen et al., 2011; Catchen et  
218 al., 2013; Rochette and Catchen, 2017) were used to demultiplex raw Illumina reads according to  
219 barcodes, discard reads with uncalled bases, discard reads with low quality scores, and filter  
220 reads for the presence of *Pst*I and *Mse*I restriction sites. Demultiplexed reads were uploaded to  
221 the National Center for Biotechnology Information (NCBI) Sequence Read Archive (SRA) under

222 BioProject ID: PRJNA541592. Individual plants with less than 100,000 total reads were removed  
223 from further processing. Samples from the *C. mollissima* and *C. crenata* outgroup cultivars were  
224 replicated twice in GBS libraries, and technical replicates with the highest number of retained  
225 reads were used for further processing. Demultiplexed reads were aligned to the *C. mollissima*  
226 reference genome v.1.1 (<https://www.hardwoodgenomics.org>) using the GSNAP software  
227 package (Wu and Nacu, 2010). Single nucleotide polymorphisms were called against the *C.*  
228 *mollissima* reference genome sequence and a catalog of tags and SNPs was generated using the  
229 ‘ref\_map.pl’ command in Stacks, with default settings. SNP genotypes were generated in the  
230 ‘populations’ program in Stacks and filtered to remove indels and multi-nucleotide variants,  
231 leaving only bi-allelic SNPs and invariant sites. To avoid issues resulting from analysis of tightly  
232 linked markers, we used the *whitelist* feature in the ‘populations’ program to retain only one SNP  
233 per locus and create a list of 500,000 randomly selected SNPs for further processing. Individual  
234 genotypes were filtered to retain only SNPs supported by five or more reads and SNPs with a  
235 minimum allele frequency of 0.01. The SNPs were further filtered to produce three different  
236 datasets for analysis, two of which were exported in Variant Call Format (VCF) and the third as  
237 a .txt file: (1) a dataset comprised of 103,616 SNPs and 103 individuals representing North  
238 American and east Asian *Castanea* species was produced by filtering for SNPs present in >80%  
239 of individuals (dataset ‘NAC+EAC’); a dataset comprised of 190,656 SNPs and 96 individuals  
240 representing the North American *Castanea* taxa was produced by filtering for SNPs present in  
241 >75% of individuals (dataset ‘NAC’); and a smaller dataset comprised of 583 SNPs and 103  
242 individuals representing North American and east Asian *Castanea* species for STRUCTURE  
243 analysis was produced by filtering for SNPs present in >95% of individuals (dataset  
244 ‘NAC+EAC583’). All datasets exported by Stacks were deposited on GitHub:

245 [https://github.com/MTPerkins/Nonhybrid\\_origin\\_of\\_Castanea\\_alabamensis](https://github.com/MTPerkins/Nonhybrid_origin_of_Castanea_alabamensis) (see Appendix S5  
246 for correspondence of dataset names to files on GitHub).

247 ***Phylogeny and genetic differentiation***—We inferred a maximum likelihood  
248 phylogenetic tree for the North American and East Asian *Castanea* taxa (dataset ‘NAC+EAC’)  
249 using the RAxML 8.2.11 (Stamatakis 2014) plugin for Geneious 11.1.5  
250 (<http://www.geneious.com/>). We used the GTRCAT model of nucleotide evolution with 100  
251 rapid bootstrap replicates and a subsequent search for the best scoring maximum likelihood tree.

252 To compare levels of genetic differentiation between the groups identified in the  
253 phylogenetic tree, we estimated Weir and Cockerham’s  $F_{ST}$  (1984) between pairs of taxa in the  
254 ‘NAC+EAC’ dataset using the ‘SNPRelate’ package (Zheng et al. 2012) in R (R Core Team  
255 2018), with default settings.

256 ***STRUCTURE analyses***—To determine the number of genetically differentiated clusters  
257 ( $K$ ) and to detect admixture among all samples (i.e., North American and East Asian species), we  
258 performed Bayesian clustering analysis on the ‘NAC+EAC583’ dataset with STRUCTURE 2.3.4  
259 software (Pritchard et al. 2000; Falush et al. 2003). We ran STRUCTURE using 35,000 burn-in  
260 repetitions, 35,000 Markov Chain Monte Carlo repetitions after burn-in, the correlated allele  
261 frequencies setting, and the admixture model for 10 iterations at  $K = 1-9$  (i.e., the number of  
262 putative taxa, plus three). After finding that *C. alabamensis* grouped with *C. pumila* sensu lato in  
263 phylogenetic analysis and the first STRUCTURE analysis, we determined the number of genetic  
264 clusters and levels of admixture in this group by removing *C. dentata*, *C. crenata*, and *C.*  
265 *mollissima* from the ‘NAC+EAC583’ dataset and running STRUCTURE with the same settings  
266 as above, apart from using  $K = 1-16$  (i.e., the number of chinquapin sample sites, plus one). The  
267 number of clusters within our *Castanea* samples from North America and eastern Asia and

268 within the chinquapins were determined by the  $\Delta K$  method (Evanno et al. 2005) implemented  
269 within the STRUCTURE HARVESTER program (Earl and vonHoldt 2012). Clustering analysis  
270 output was summarized and visualized using the Cluster Markov Packager Across K algorithm  
271 (CLUMPAK), with default settings (Kopelman et al. 2015). Because the STRUCTURE analysis  
272 of the full dataset identified one putative *C. dentata* sample and one putative *C. pumila* var.  
273 *ozarkensis* sample as admixed with East Asian *Castanea* spp., we did not include these two  
274 samples in further analysis.

275 ***Principal components analysis***—To understand the partitioning of genetic variation  
276 within the North American *Castanea* species and determine the relative placement of *C.*  
277 *alabamensis* samples, we performed principal components analysis (PCA) using the ‘NAC’  
278 dataset. Principal components analysis was performed using the ‘SNPRelate’ package in R, with  
279 settings “remove.monosnp=TRUE”, “maf=NaN”, and “missing.rate=NaN”. Because missing  
280 genotypes as a result of variation in DNA quality can introduce apparent, but erroneous,  
281 population structure in PCA (Patterson et al., 2006), the dataset was further filtered for PCA by  
282 identifying individuals with <30% missing SNP loci using TASSEL v5.0 (Bradbury et al. 2007)  
283 and specifying for analysis only individuals below this threshold.

## 284 **RESULTS**

285 ***Morphological comparisons***—Our collections from northern Alabama *Castanea*  
286 populations yielded samples of *C. dentata* and several samples that corresponded to the  
287 taxonomic description of *C. alabamensis* (Ashe, 1925). Plants identified as *Castanea*  
288 *alabamensis* differed from all other North American *Castanea* taxa in certain key aspects (Table  
289 1; Fig. 1).

290  
291  
292  
293  
294  
295  
296  
297  
298  
299  
300  
301  
302  
303  
304  
305  
306  
307  
308

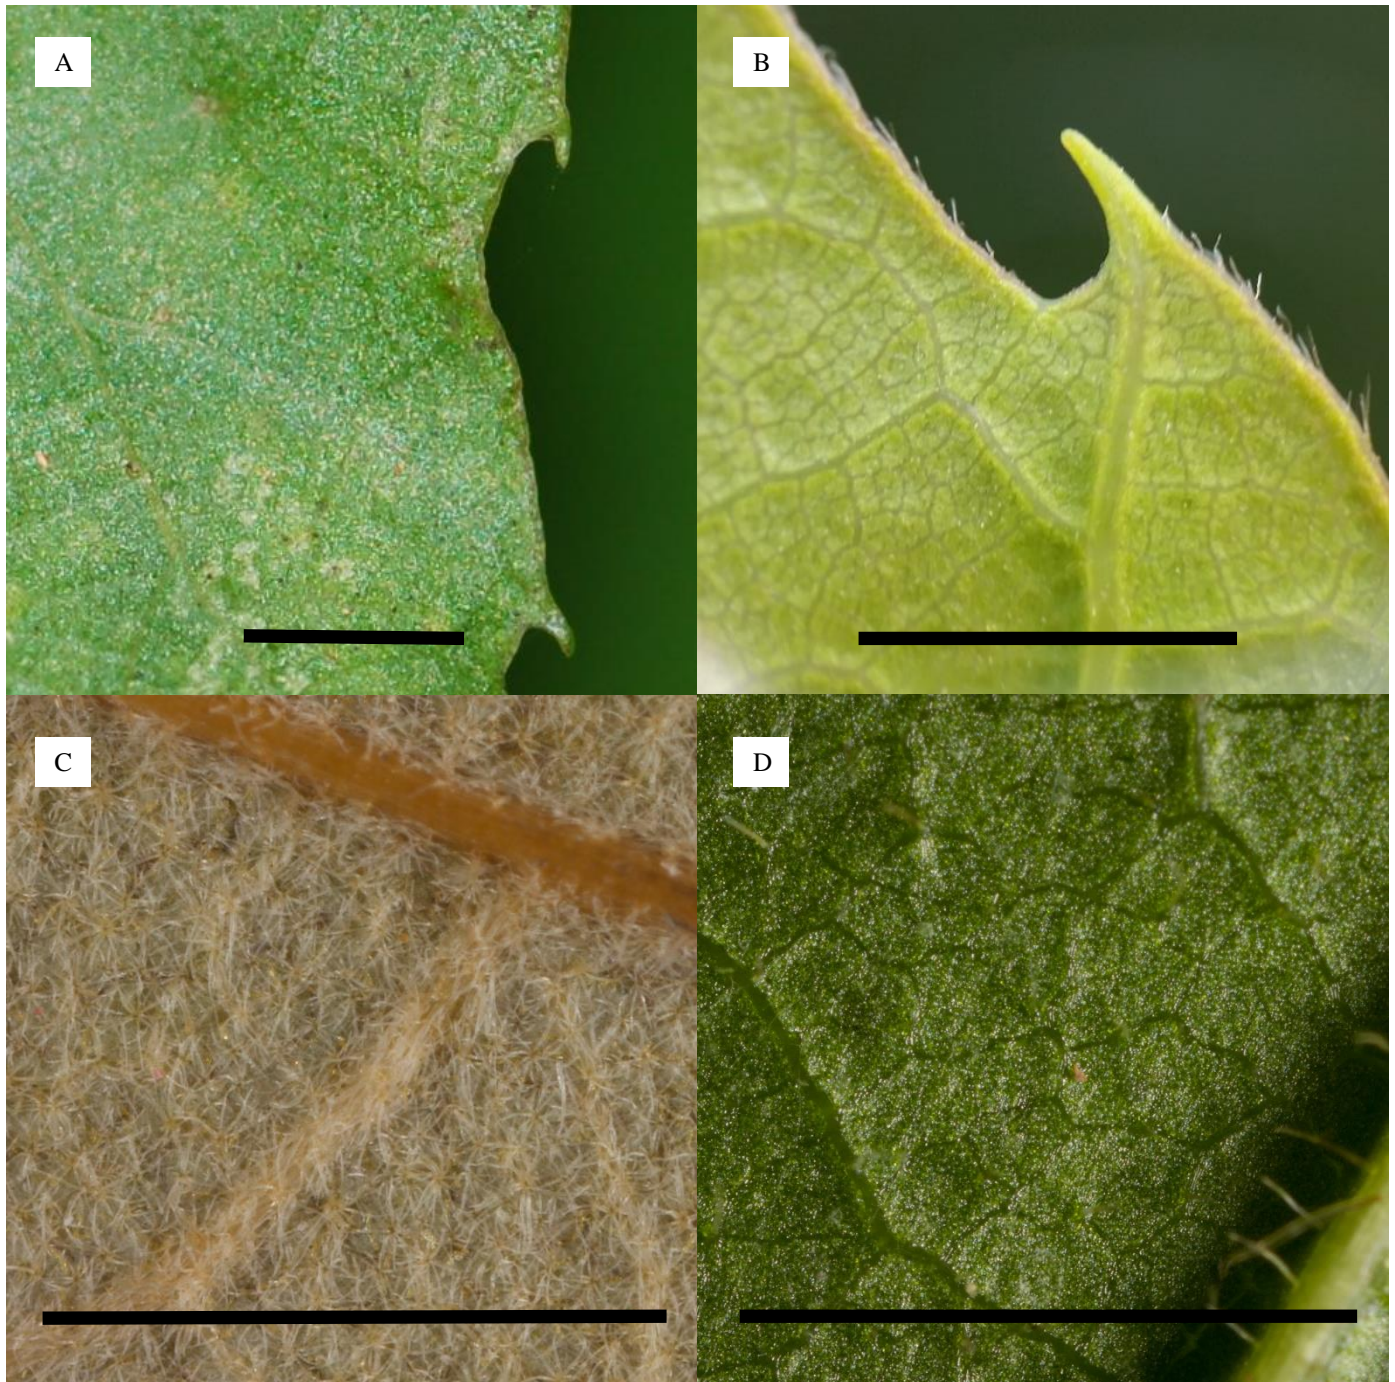

309 Fig. 1 Morphological features distinguishing *C. alabamensis* from *C. dentata* and *C. pumila* var.  
310 *ozarkensis*. (A) Eciliate leaf margin of *C. dentata*. (B) Ciliate leaf margin of *C. alabamensis*. (C)  
311 Abaxial leaf surface of *C. pumila* var. *ozarkensis* densely covered with stellate trichomes. (D)  
312 Abaxial leaf surface of *C. alabamensis* lacking stellate trichomes, but with occasional simple  
313 trichomes on laminar surface. Simple trichomes projecting from lateral vein are visible in the  
314 lower righthand corner of the image. Scale bars = 5 mm.



315 While the prevalence of chestnut blight infection prevented us from gathering data on  
316 floral/fruit morphology in many wild populations (i.e., plants were typically not reproductively  
317 mature), the nut per bur and pistil per bur ratios observed were consistent with the most recent  
318 taxonomic treatments of the group (Johnson, 1988; Nixon, 1997; Weakley, 2015). Chestnut  
319 blight infection also prevented us from assessing mature plant habit in most North American  
320 *Castanea* populations; however, we did observe a few reproductively mature *C. alabamensis*  
321 individuals where we could determine that plant habit of mature, healthy trees is typically that of  
322 a single-stemmed tree, rather than a shrub, consistent with Ashe's description of the species  
323 (1925).

324 Morphological study of the entire *Castanea* collection at NCU, the voucher specimens  
325 from Binkley (2008) and Shaw et al. (2012), and recent collections from the Ruffner Mtn., AL,  
326 site studied by Li and Dane (2013) revealed that the *C. × neglecta* populations studied by  
327 Binkley (2008) and Shaw et al. (2012) and the Type II *C. dentata* studied by Li and Dane (2013)  
328 are morphologically identical to *C. alabamensis* (Ashe, 1925) (Appendix S2). The *C. × neglecta*  
329 samples of Binkley (2008) and Shaw et al. (2012) and the Type II *C. dentata* samples of Li and  
330 Dane (2013) are identical to Ashe's (1925) original collections of *C. alabamensis* in all aspects  
331 of leaf, twig, and flower/fruit morphology that we assessed.

332 ***Illumina sequencing and SNP discovery***—A total of 489.9 million Illumina reads were  
333 obtained for 106 plants (including both technical replicates of the East Asian cultivars)  
334 (Appendix S4). Three plants, Haun *C. dentata*, SE56 *C. pumila* var. *pumila*, and TM49 *C.*  
335 *pumila* var. *pumila*, had <100,000 retained reads and were excluded from further processing.  
336 Only the higher quality technical replicate of each *C. mollissima* and *C. crenata* cultivar was  
337 retained. After removal of the three failed samples and four lower quality technical replicates of

338 Asian *Castanea* samples, the average clean reads per individual was 4.384 million. In the 103  
339 samples that were retained for genotyping, average coverage depth was 44×. Three datasets were  
340 produced for analysis by Stacks 1.45: dataset ‘NAC+EAC’ contained 103 individuals of North  
341 American and eastern Asian *Castanea* species and 103,616 SNPs; dataset ‘NAC’ contained 96  
342 individuals of North American *Castanea* species and 190,656 SNPs; and dataset  
343 ‘NAC+EAC583’ contained 103 individuals of North American and eastern Asian *Castanea*  
344 species and 583 SNPs.

345 ***Phylogeny and genetic differentiation***—The maximum likelihood phylogeny inferred  
346 from the ‘NAC+EAC’ dataset indicated the existence of six distinct groups corresponding to the  
347 morphologically-defined taxa present in our dataset: *C. mollissima*, *C. crenata*, *C. dentata*, *C.*  
348 *pumila* var. *ozarkensis*, *C. pumila* var. *pumila*, and *C. alabamensis* (Fig. 2). The North American  
349 *Castanea* species formed a monophyletic group. Two main clades were present within the North  
350 American *Castanea* group: (1) *C. dentata* and (2) the North American chinquapins, inclusive of  
351 *C. alabamensis*, *C. pumila* var. *pumila*, and *C. pumila* var. *ozarkensis*. Bootstrap values for the  
352 nodes separating named taxa were 100% in all cases, except the node separating *C. alabamensis*  
353 and *C. pumila* var. *pumila*, which was 91% (Fig. 2; Appendix S6).

354

355

356

357

358

359

360

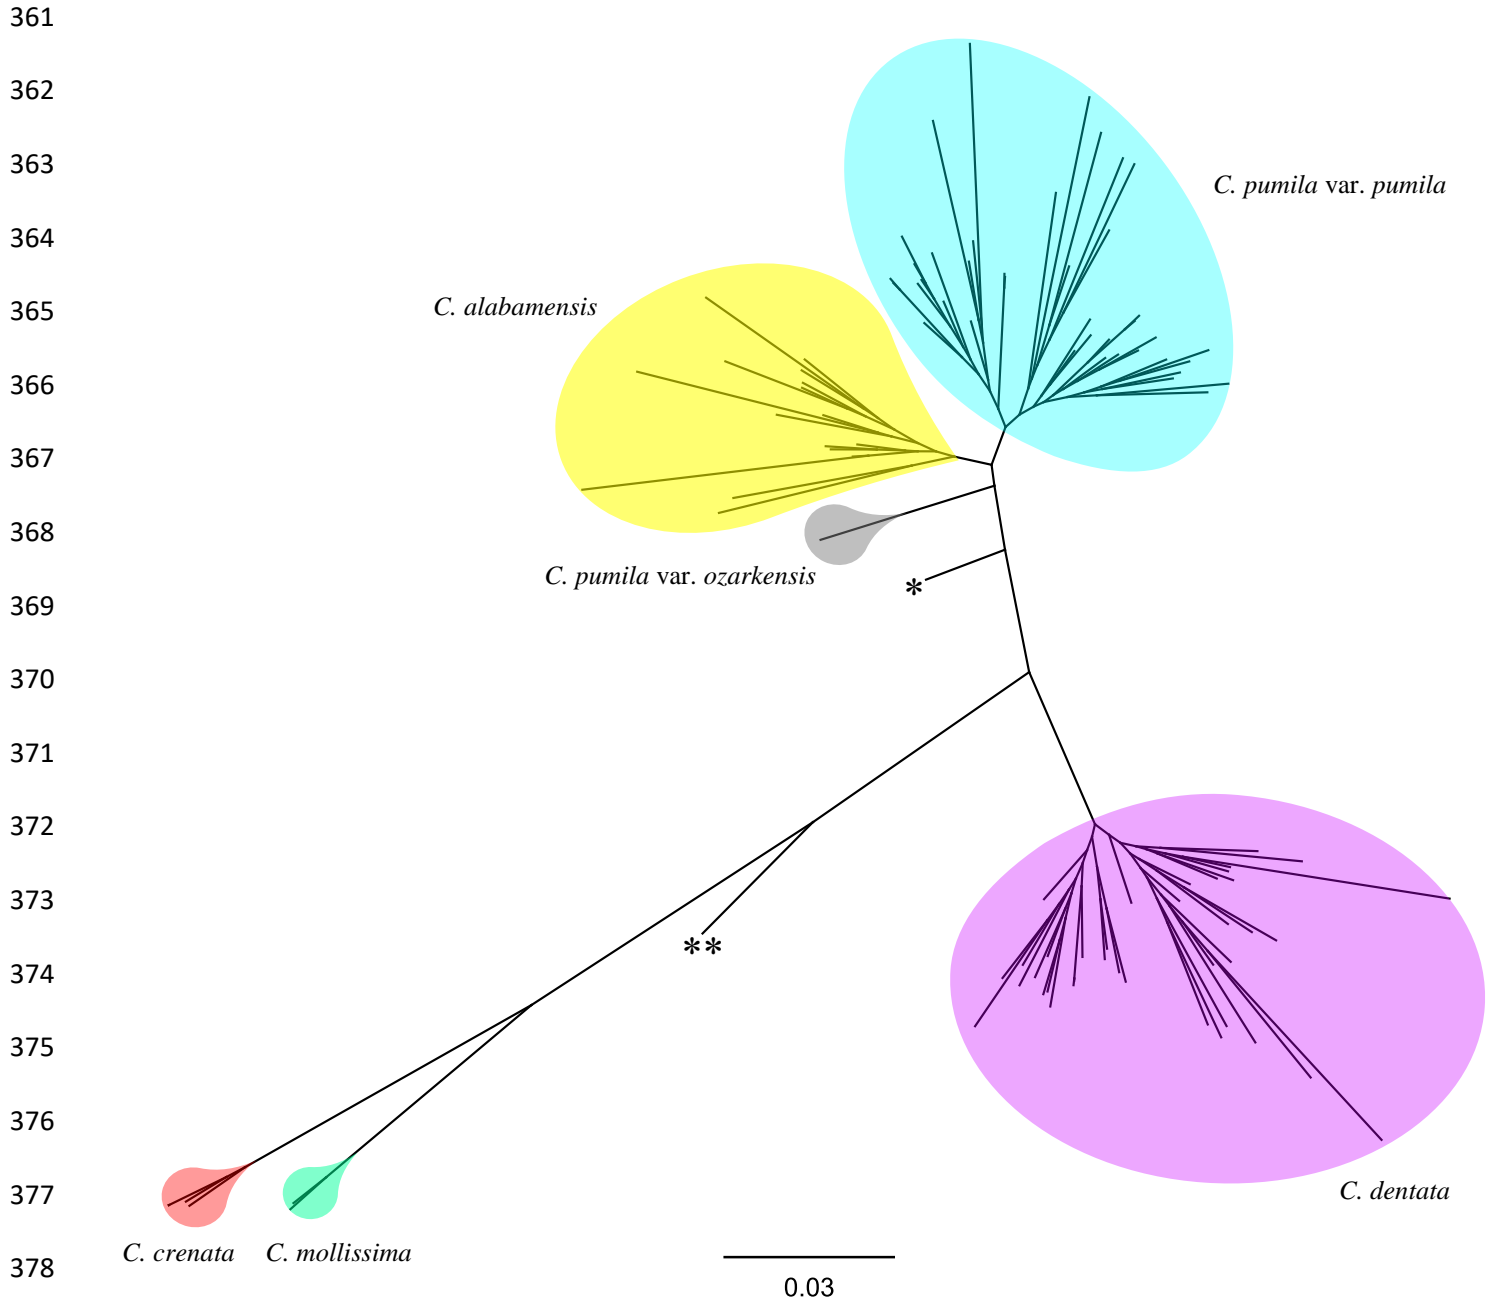

379 Fig. 2 Maximum likelihood phylogenetic tree inferred for North American and eastern Asian  
380 *Castanea* samples using genome-wide data from 103,616 SNP loci. Asterisks indicate  
381 interspecific hybrids identified by STRUCTURE analysis. One asterisk (\*) corresponds to an  
382 interspecific hybrid derived from *C. pumila var. ozarkensis*, *C. dentata*, and an unidentified East  
383 Asian *Castanea* sp.; two asterisks (\*\*) correspond to a first-backcross descendant of *C. dentata*  
384 and *C. mollissima*. Bootstrap support for the nodes separating the highlighted taxa was 100% in  
385 all cases except the node separating *C. alabamensis* and *C. pumila var. pumila*, where bootstrap  
386 support was 91%. Scale bar is proportional to 0.03 substitutions/site.

387

388           The *C. dentata* clade was comprised of two distinct groups: (1) a group containing only  
389 individuals from the northern portion of the species' range (samples from Maine, Pennsylvania,  
390 and Virginia) and individuals from the Blue Ridge of the southern portion of the species' range  
391 (samples from North Carolina, South Carolina, and Georgia) and (2) a group containing only  
392 individuals from outside the Blue Ridge in the southern portion of the species' range (samples  
393 from Piedmont of South Carolina, Interior Plateau of Tennessee, and Ridge and Valley and  
394 Southwestern Appalachians of Alabama). Bootstrap support for the two *C. dentata* groups was  
395 100% (Appendix S6).

396           Within the *C. pumila* sensu lato clade, *C. alabamensis* and the different botanical  
397 varieties of chinquapin, *C. pumila* var. *pumila* and *C. pumila* var. *ozarkensis*, formed three  
398 distinct groups. The *C. pumila* var. *pumila* group was comprised of two subgroups: (1) a group  
399 containing only individuals from the southern Blue Ridge (samples from North Carolina, South  
400 Carolina, and Georgia) and (2) a group containing one individual from the southern Blue Ridge  
401 (a sample from South Carolina) and all individuals from the Coastal Plain (samples from South  
402 Carolina, Florida, and Georgia). Bootstrap support for the split separating *C. pumila* var. *pumila*  
403 samples into two groups was 100% (Appendix S6).

404           The phylogenetic placement of two samples did not match their putative species  
405 assignments. The first sample (dent hyb16\_KY), thought to represent a *C. dentata* collection,  
406 was placed at an intermediate position between *C. dentata* and the East Asian *Castanea* species  
407 on the phylogenetic tree; review of our records showed that this sample was a first-backcross  
408 hybrid of *C. dentata* and *C. mollissima* ancestry. The second sample (ozar hyb63\_MO), thought  
409 to represent *C. pumila* var. *ozarkensis*, was placed at an intermediate position between *C. pumila*  
410 sensu lato and *C. dentata* on the phylogenetic tree; STRUCTURE analysis results (detailed

411 below) showed that this individual derived ancestry from *C. pumila* var. *ozarkensis*, *C. dentata*,  
412 and an undetermined East Asian *Castanea* species.

413 Mean genetic differentiation, as estimated by Weir and Cockerham's (1984)  $F_{ST}$ , ranged  
414 from 0.71 (*C. mollissima* – *C. pumila* var. *ozarkensis*) to 0.11 (*C. pumila* var. *pumila* – *C.*  
415 *alabamensis*) (Appendix S7). In contrast to what would be expected if *C. alabamensis* were a  
416 hybrid taxon derived from *C. dentata* and *C. pumila* var. *pumila*, genetic differentiation was  
417 greater between *C. alabamensis* and *C. dentata* ( $F_{ST} = 0.40$ ) than between *C. pumila* var. *pumila*  
418 and *C. dentata* ( $F_{ST} = 0.38$ ).

419 **STRUCTURE analyses**—STRUCTURE analysis indicated the presence of three  
420 genetically differentiated clusters ( $K = 3$ ) in dataset 'NAC+EAC583' (Fig. 3A) (see Appendix S7  
421 for  $\Delta K$  values) These three clusters corresponded to (1) *C. dentata*, (2) *C. pumila* var. *pumila*, *C.*  
422 *pumila* var. *ozarkensis*, and *C. alabamensis* combined, and (3) the eastern Asian *Castanea*  
423 samples. STRUCTURE did not identify a *C. dentata* contribution to *C. alabamensis* genomes  
424 (Fig. 3A). Although one *C. alabamensis* sample, AG87\_AL, appeared to have a small fraction of  
425 *C. dentata* ancestry (*C. dentata* ancestry proportion estimate = 0.05), this sample had the highest  
426 percentage of missing SNPs (82% missing SNPs) of any samples in the 'NAC+EAC583' dataset  
427 and the lowest number of retained reads of any plants included in analyses; this result is likely an  
428 artifact of low sample quality.

429

430

431

432

433

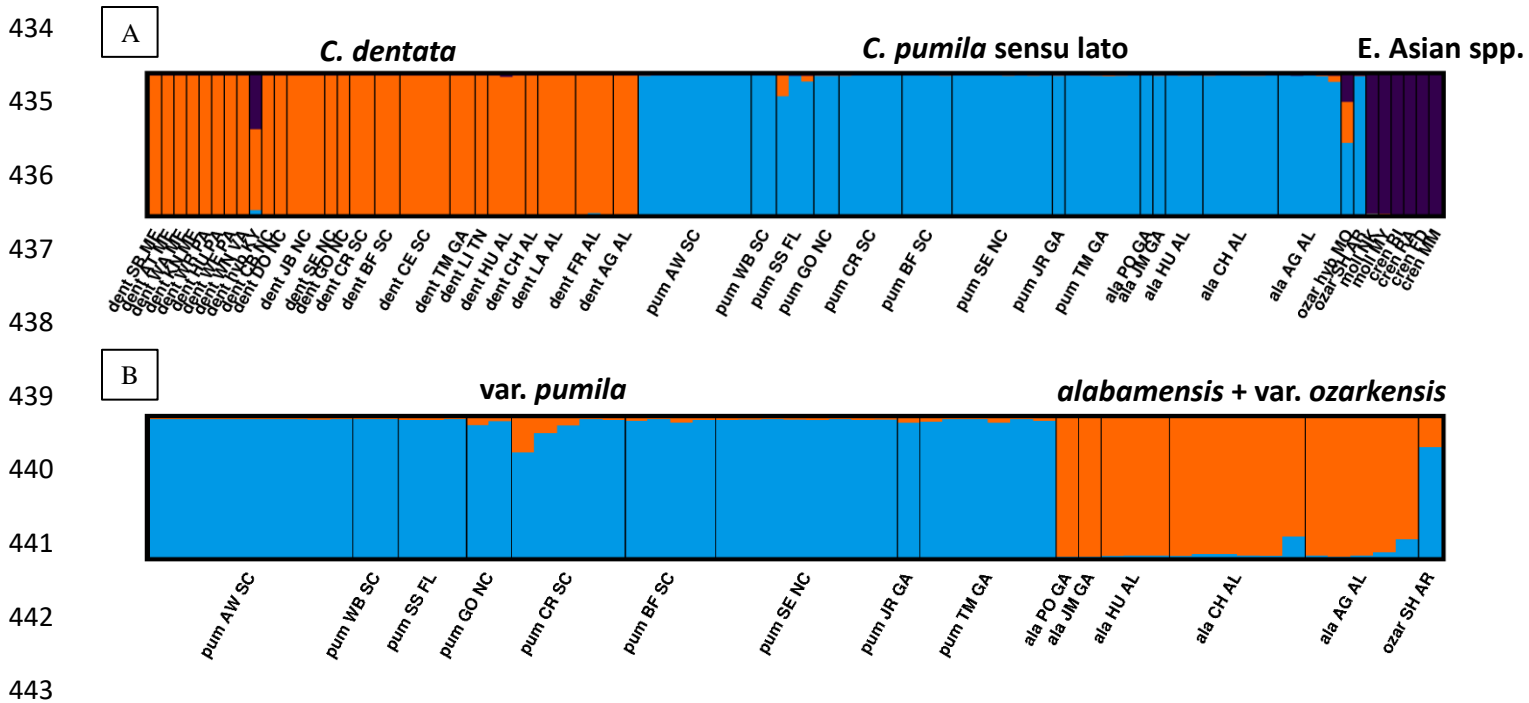

444 Fig. 3. Bar plots of ancestry proportions from STRUCTURE analyses of (A) North American  
445 and eastern Asian *Castanea* samples and (B) North American chinquapin samples only. Each  
446 column represents the ancestry proportion estimate for an individual plant, with each individual's  
447 estimated membership fraction illustrated by colored segments that correspond to  $K$  inferred  
448 clusters in the dataset. Black vertical lines group individuals according to their sample sites.  
449 Sample site information along the lower edge of the plots indicate species, site code, and state  
450 (e.g., pum AW SC). (A) Results of analysis of 583 SNP loci in 103 plants representing *C.*  
451 *alabamensis*, *C. pumila* var. *pumila*, *C. pumila* var. *ozarkensis*, *C. dentata*, *C. mollissima*, and *C.*  
452 *crenata*. The number of distinct genetic clusters identified ( $K = 3$ ) corresponds to *C. dentata*, *C.*  
453 *pumila* sensu lato, and the sampled eastern Asian *Castanea* spp., *C. mollissima* and *C. crenata*.  
454 (B) Results of analysis of 583 SNP loci in 57 individuals representing *C. alabamensis*, *C. pumila*  
455 var. *pumila*, and *C. pumila* var. *ozarkensis*. The number of distinct genetic clusters identified ( $K$   
456 = 2) corresponds to *C. pumila* var. *pumila* and *C. alabamensis/C. pumila* var. *ozarkensis*.  
457

458

459

460

461

462

463 Analysis of *C. dentata* samples also failed to detect a genetic contribution from *C. pumila*  
464 sensu lato in sympatric populations. However, two *C. pumila* var. *pumila* individuals, both from  
465 the allopatric site SS\_FL, had evidence of *C. dentata* ancestry. Of these two admixed samples,  
466 SS80\_FL, was estimated to derive as much as 0.15 of its genome from *C. dentata*.

467 STRUCTURE analysis of the North American chinquapins *Castanea pumila* sensu lato  
468 (including *C. alabamensis*) indicated the presence of two genetically differentiated clusters ( $K =$   
469 2)—the first corresponding to *C. pumila* var. *pumila* and the second corresponding to *C.*  
470 *alabamensis* and *C. pumila* var. *ozarkensis* combined (Fig. 3B; see Appendix S7 for  $\Delta K$  values).  
471 Low to moderate levels of admixture between the different botanical varieties of chinquapin  
472 were found in the majority of populations analyzed. The single *C. pumila* var. *ozarkensis*  
473 individual (ozar\_SH\_AR) remaining after removal of the interspecific hybrid from Missouri  
474 showed evidence of substantial admixture with *C. pumila* var. *pumila*. Evidence of admixture  
475 was also present in *C. alabamensis* populations, with higher levels of *C. pumila* var. *pumila*  
476 ancestry in the more southerly *alabamensis* populations, CH\_AL and AG\_AL (Fig. 3B).

477 **Principal component analysis**—To provide an additional test of the hybridization  
478 hypothesis for *C. alabamensis* and to better understand partitioning of genetic variation within  
479 the North American clade, we performed PCA using the 80 North American *Castanea* samples  
480 in dataset ‘NAC’ with <30% missing SNP loci. Principal component analysis of the North  
481 American *Castanea* identified 32 significant principal components (PCs) that explained 56.52%  
482 of the total variation (Appendix S7). The first two principal components provided clear  
483 separation of the three currently recognized North American taxa and *C. alabamensis* from one  
484 another (Fig. 4). The first component explained 10.96% of the total variation and separated *C.*  
485 *dentata* samples from samples of *C. alabamensis*, *C. pumila* var. *pumila*, and *C. pumila* var.

486 *ozarkensis* (Fig. 4; Appendix S7). The second component explained 2.75% of the total variation  
487 and separated *C. pumila* var. *pumila*, *C. pumila* var. *ozarkensis*, and *C. alabamensis* from one  
488 another. *C. pumila* var. *pumila* samples from the Coastal Plain of Florida and South Carolina  
489 were placed along the leftmost portion of the axis created by PC2 in Fig. 4 (i.e., lower values for  
490 PC2). However, samples from other parts of the geographical distribution of *C. pumila* var.  
491 *pumila* were not completely excluded from the leftmost portion of PC2, as one sample from the  
492 Blue Ridge province of South Carolina, CR6\_SC, clustered with Coastal Plain samples. *C.*  
493 *pumila* var. *pumila* samples from sites farther inland—specifically, the Blue Ridge of South  
494 Carolina, North Carolina, and Georgia—clustered near the midrange of PC2. In contrast to what  
495 would be expected for a hybrid taxon, PCA did not place any *C. alabamensis* samples  
496 intermediate to the *C. pumila* sensu lato and *C. dentata* clusters.

497

498

499

500

501

502

503

504

505

506

507

508



509

510

511

512

513

514

515

516

517

518

519

520

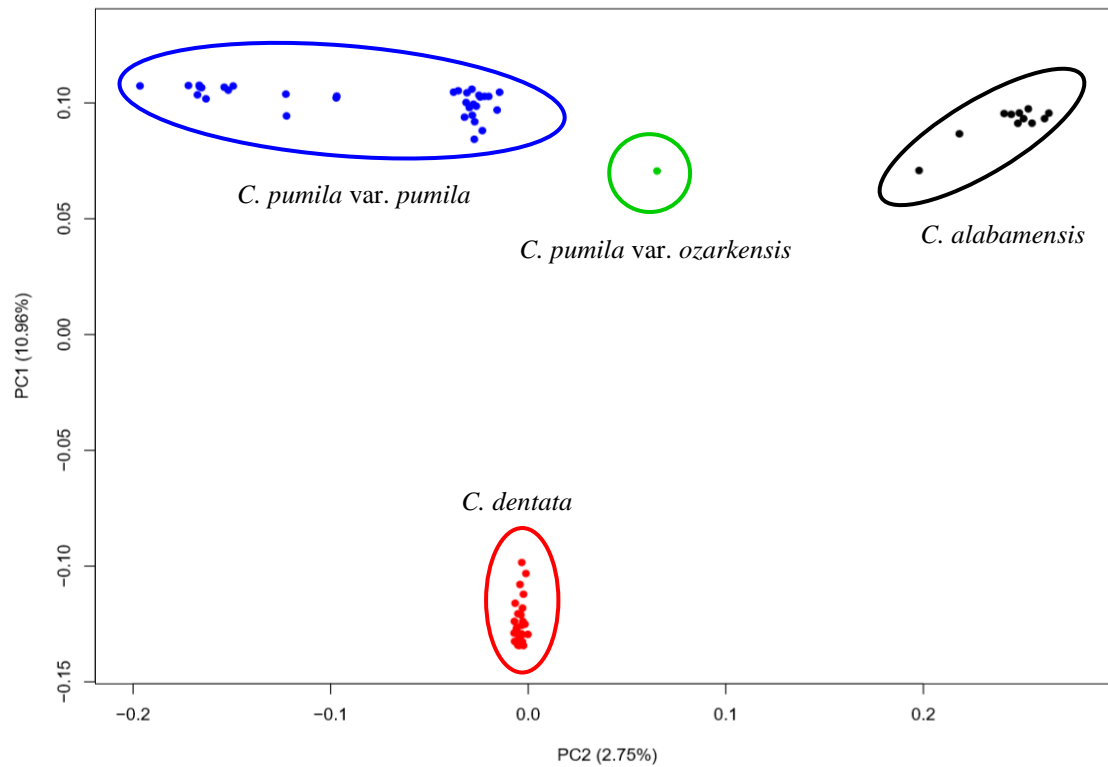

521

522

523

524

525

526

527

528

529

530

531

532

533

Fig. 4. Graph of the first two axes from a principal components analysis of 80 individuals representing the putative hybrid, *C. alabamensis*, and all other North American *Castanea* taxa. Dot colors correspond to the following taxa: blue = *C. pumila* var. *pumila*, green = *C. pumila* var. *ozarkensis*, black = *C. alabamensis*, and red = *C. dentata*.

534 **DISCUSSION**

535 ***C. alabamensis is a distinct variety of North American Castanea that includes plants***  
536 ***previously identified as hybrids between Castanea species***—While agreeing with previous  
537 studies that North American *Castanea* is composed of two species, *C. dentata* and *C. pumila*  
538 sensu lato, we have presented compelling evidence that plants identified by Ashe (1925) as *C.*  
539 *alabamensis* comprise a distinct variety within *C. pumila* sensu lato along with *C. pumila* var.  
540 *pumila* and *C. pumila* var. *ozarkensis*. Our study represents the first use of genome-wide data to  
541 understand evolution and hybridization in the North American *Castanea* species. With different  
542 population sampling methods, our analytical approach can be applied to other questions of  
543 importance for conservation and restoration of the American chestnut and chinquapins. Our  
544 findings provide much needed clarification of the evolutionary relationships, species boundaries,  
545 and history of admixture of the North American *Castanea* taxa and will allow workers in the  
546 field of chestnut and chinquapin conservation to more efficiently conserve and restore the  
547 biodiversity of these imperiled taxa.

548 In contrast to multiple recent studies of closely-related sympatric species in the Fagaceae  
549 (Cavender-Bares and Pahlich, 2009; Leroy et al. 2017; Kim et al. 2018), we find that *C. dentata*  
550 and *C. pumila* are both genetically and morphologically discrete where they co-occur, with no  
551 evidence of local hybridization and introgression. Jaynes (1964) reported that fertile hybrids can  
552 be made among all *Castanea* species. The reproductive barrier between the species is most likely  
553 flowering time; *C. pumila* blooms 1-2 weeks earlier than *C. dentata* (P.H. Sisco, J.H. Craddock,  
554 unpublished data).

555 ***Admixture among taxa***—Although we did not document admixture with *C. dentata* in  
556 our *C. alabamensis* samples, many other cases of intra- and interspecific admixture were

557 identified. Perhaps the most interesting case of interspecific admixture that we documented  
558 involved samples from a morphologically intriguing population of *C. pumila* var. *pumila* in  
559 Florida. Despite the stark morphological differences between these *C. pumila* var. *pumila*  
560 individuals and *C. dentata*, two of three individuals had evidence of introgression from *C.*  
561 *dentata* and one of the plants had an ancestry proportion estimate of 0.15 from *C. dentata* in  
562 STRUCTURE. These plants, which were perhaps the most morphologically unique of the study,  
563 are the rhizomatous subshrub form (only ~0.5-2 m tall at reproductive maturity) of chinquapin  
564 that have been treated as *C. alnifolia* (common name: trailing chinquapins) in older taxonomic  
565 works (Nuttall, 1818; Sargent, 1919; Ashe, 1922). These Florida *C. pumila* populations are  
566 currently separated from the southernmost known *C. dentata* populations by hundreds of  
567 kilometers. The finding of *C. dentata* ancestry in these *C. pumila* plants is consistent with the  
568 hypothesis that the range of *C. dentata* once extended much farther south than is currently  
569 observed (Davis, 1983). While other population genetics studies have inferred a post-Pleistocene  
570 expansion of *C. dentata* populations from south to north along the Appalachians (e.g., Gailing  
571 and Nelson, 2017), our finding of *C. dentata* ancestry in *C. pumila* populations from Florida is  
572 the most direct genetic evidence produced in support of a Pleistocene refugium for *C. dentata* in  
573 the southeastern Coastal Plain.

574       Finally, many cases of intraspecific admixture within the chinquapin clade were also  
575 documented in our data. Within *C. pumila* sensu lato, admixture between the two genetic groups  
576 identified by STRUCTURE—(1) *C. pumila* var. *pumila* and (2) *C. alabamensis* and *C. pumila*  
577 var. *ozarkensis*—was observed in most populations, indicating a recent history of shared ancestry  
578 between the different botanical varieties of chinquapin. It should be noted, however, that none of  
579 the chinquapin populations analyzed in this study were collected from areas of sympatry for

580 distinct chinquapin varieties (i.e., where *C. pumila* var. *pumila* and *C. pumila* var. *ozarkensis*  
581 occur at the same site or within effective pollination distance). Thus, levels of admixture in  
582 sympatric populations containing multiple chinquapin varieties cannot be assessed from our data.  
583 Given the low to moderate levels of admixture between chinquapin varieties documented in  
584 allopatric populations in the present study, we expect sympatric populations to display even  
585 greater signatures of shared ancestry.

586

## 587 **CONCLUSIONS**

588 We have used genome-wide SNP data and morphology to show that *C. alabamensis* is a distinct  
589 variety of North American chinquapin (*C. pumila* sensu lato) that includes plants previously  
590 identified morphologically as hybrids between *Castanea* species. A combination of genome-  
591 wide genotyping and morphological analysis was required to better understand the origin of the  
592 putative hybrids and the nature of species boundaries in North American *Castanea*. Presumed  
593 naturally-occurring admixtures between different *Castanea* species and varieties were found,  
594 most notably between *C. pumila* var. *pumila* in northern Florida and *C. dentata*. Our results  
595 demonstrate the capability of genomic approaches to resolve previously intractable questions of  
596 *Castanea* evolution and highlight the need for further exploration of *Castanea* diversity.

597

## 598 **ACKNOWLEDGMENTS**

599 We acknowledge funding support from the Foundation for the Carolinas (by philanthropists  
600 Shelli and Brad Stanback), the University of Tennessee at Chattanooga Department of Biology,  
601 Geology, & Environmental Science, the Southern Appalachian Botanical Society, the University  
602 of Tennessee at Chattanooga Graduate School, and the American Chestnut Foundation. We

603 thank Lisa W. Alexander for helpful discussions regarding chestnut hybridization. We  
604 acknowledge field sampling guidance and private property access provided by David Morris, Ed  
605 Schwartzman, Robert Simons, Jack Agricola, Bruce and Francine Hutchinson, Gary Carver,  
606 Larry Brasher, Glenda Frames, Marty Schulman, Will Calhoun, Jim Lacefield, Donald Hagan,  
607 and Timothy Spira. We thank Mary Klinghard, Cameron Perkins, Jessica Tzeng, Brooke  
608 Hadden, and Conrad Blunck for assistance with field sampling. We thank Dr. Ethan Hereth for  
609 help with the NCBI SRA data upload. Trent Deason generously shared early access to his  
610 voucher specimens from the Ruffner Mtn. sample site. Caleb Powell provided valuable field  
611 sampling assistance and herbarium database curation. Dan Thornton and Stylianos  
612 Chatzimanolis provided helpful guidance with leaf macrophotography. Information regarding  
613 naturally-occurring American chestnut trees in the breeding program of the American Chestnut  
614 Foundation was provided by Kendra Collins and Eric Evans. Xiaoxia Xia, Rooksana Noorai,  
615 Chris Saski, and the Clemson University Genomics and Computational Biology Laboratory  
616 generously provided bioinformatic and analytical assistance. We thank the University of North  
617 Carolina Chapel Hill Herbarium for the generous loan of museum specimens used in this study.

618

## 619 **DATA ACCESSIBILITY**

620 Sequence data are available at the NCBI SRA (BioProject ID: PRJNA541592). All datasets used  
621 in analyses are available on GitHub:

622 [https://github.com/MTPPerkins/Nonhybrid\\_origin\\_of\\_Castanea\\_alabamensis](https://github.com/MTPPerkins/Nonhybrid_origin_of_Castanea_alabamensis).

623

624

625

626 **LITERATURE CITED**

627 Allendorf, F.W., R.F. Leary, P. Spruell, and J.K. Wenburg. 2001. The problems with hybrids:  
628 setting conservation guidelines. *Trends in Ecology and Evolution* 16(11): 613–622.

629 Allendorf, F.W., G. Luikart, and S.N. Aitken. 2013. Conservation and the genetics of  
630 populations, 2<sup>nd</sup> ed. Wiley-Blackwell, West Sussex, UK.

631 Ashe, W.W. 1922. Notes on trees and shrubs of the southeastern United States. *Bulletin of the*  
632 *Torrey Botanical Club* 49(9): 265–268.

633 Ashe, W.W. 1925. Notes on woody plants. *The Charleston Museum Quarterly* 1(2): 28–32.

634 Baute, G.J., G.L. Owens, D.G. Bock, and L.H. Rieseberg. 2016. Genome-wide genotyping-by-  
635 sequencing data provide a high-resolution view of wild *Helianthus* diversity, genetic structure,  
636 and interspecific gene flow. *American Journal of Botany* 103(12): 2170–2177.

637 Biomatters development team. 2018. Geneious 11.1.5. Biomatters Ltd., website:  
638 <http://www.geneious.com/> [accessed 01 October 2018].

639 Binkley, M.A. 2008. The phylogeography of North American chestnuts and chinquapins  
640 (*Castanea* Mill., Fagaceae). M.S. thesis, The University of Tennessee at Chattanooga,  
641 Chattanooga, Tennessee, USA.

642 Bradbury, P.J., Z. Zhang, D.E. Kroon, T.M. Casstevens, Y. Ramdoss, and E.S. Buckler, E.S.  
643 2007. TASSEL: Software for association mapping of complex traits in diverse samples.  
644 *Bioinformatics* 23: 2633–2635.

645 Camus, A. 1929. Les chataigniers. Monographie des genres *Castanea* et *Castanopsis*.  
646 Encyclopédie Économique de Sylviculture, vol. 3. Paul Lechevalier, Paris, France.

- 647 Catchen, J., A. Amores, P. Hohenlohe, W. Cresko, and J. Postlethwait. 2011. Stacks: building  
648 and genotyping loci de novo from short-read sequences. *G3: Genes, Genomes, Genetics* 1:171–  
649 182.
- 650 Catchen, J., P. Hohenlohe, S. Bassham, A. Amores, and W. Cresko. 2013. Stacks: an analysis  
651 tools set for population genomics. *Molecular Ecology* 22(11): 3124–3140.
- 652 Cavender-Bares, J., and A. Pahlich. 2009. Molecular, morphological, and ecological niche  
653 differentiation of sympatric sister oak species, *Quercus virginiana* and *Q. geminata* (Fagaceae).  
654 *American Journal of Botany* 96(9): 1690–1702.
- 655 Dane, F. 2009. Comparative phylogeography of *Castanea* species. *Acta Horticulturae* 844:211–  
656 222.
- 657 Davis, M.B. 1983. Quaternary history of deciduous forests of eastern North America and Europe.  
658 *Annals of the Missouri Botanical Garden* 70(3): 550–563.
- 659 Dode, L.A. 1908. Notes dendrologiques. VI. Sur les chataigniers. *Bulletin de la Société*  
660 *Dendrologique de France* 8: 140–166.
- 661 Earl, D.A., and B.M. vonHoldt. 2012. STRUCTURE HARVESTER: a website and program for  
662 visualizing STRUCTURE output and implementing the Evanno method. *Conservation Genetics*  
663 *Resources* 4(2): 359–361.
- 664 Eaton, D.A.R., A.L. Hipp, A. González-Rodríguez, and J. Cavender-Bares. 2015. Historical  
665 introgression among the American live oaks and the comparative nature of tests for  
666 introgression. *Evolution* 69(10): 2587–2601.
- 667 Elias, T.S. 1971. The genera of Fagaceae in the southeastern United States. *Journal of the Arnold*  
668 *Arboretum* 52: 159–195.

- 669 Ellstrand, N.C., R. Whitkus, and L.H. Rieseberg. 1996. Distribution of spontaneous plant  
670 hybrids. *Proceedings of the National Academy of Sciences, USA* 93: 5090–5093.
- 671 Elshire, R.J., J.C. Glaubitz, Q. Sun, J.A. Poland, K. Kawamoto, E.S. Buckler, and S.E. Mitchell,  
672 S.E. 2011. A robust, simple genotyping-by-sequencing (GBS) approach for high diversity  
673 species. *PLoS ONE* 6(5): e19379.
- 674 Escudero, M., D.A.R. Eaton, M. Hahn, and A.L. Hipp. 2014. Genotyping-by-sequencing as a  
675 tool to infer phylogeny and ancestral hybridization: a case study in *Carex* (Cyperaceae).  
676 *Molecular Phylogenetics and Evolution* 79: 359–367.
- 677 Evanno, G., S. Regnaut, and J. Goudet. 2005. Detecting the number of clusters of individuals  
678 using the software STRUCTURE: a simulation study. *Molecular Ecology* 14: 2611–2620.
- 679 Falush, D., M. Stephens, and J.K. Pritchard. 2003. Inference of population structure: extensions  
680 to linked loci and correlated allele frequencies. *Genetics* 164: 1567–1587.
- 681 Gailing, O., and C.D. Nelson. 2017. Genetic variation patterns of American chestnut populations  
682 at EST-SSRs. *Botany* 95(8): 799–807.
- 683 Jackiw, R.N., G. Mandil, and H.A. Hager. 2015. A framework to guide the conservation of  
684 species hybrids based on ethical and ecological considerations. *Conservation Biology* 29(4):  
685 1040–1051.
- 686 Jaynes, R.A. 1964. Interspecific crosses in the genus *Castanea*. *Silvae Genetica* 13: 146–154.
- 687 Johnson, G.P. 1988. Revision of *Castanea* sect. *Balanocastanon* (Fagaceae). *Journal of the*  
688 *Arnold Arboretum* 69: 25–49.
- 689 Kim, B.Y., X. Wei, S. Fitz-Gibbon, K.E. Lohmueller, J. Ortego, P.F. Gugger, and V.L. Sork.  
690 2018. RADseq data reveal ancient, but not pervasive, introgression between Californian tree and  
691 scrub oak species (*Quercus* sect. *Quercus*: Fagaceae). *Molecular Ecology* 27: 4556–4571.



692 Kopelman, N.M., J. Mayzel, M. Jakobsson, N.A. Rosenberg, and I. Mayrose. 2015. CLUMPAK:  
693 a program for identifying clustering modes and packaging population structure inferences across  
694 *K. Molecular Ecology Resources* 15(5): 1179–1191.

695 Kubisiak, T.L., C.D. Nelson, M.E. Staton, T. Zhebentyayeva, C. Smith, B.A. Olukolu, G.-C.  
696 Fang, F.V. Hebard, S. Anagnostakis, N. Wheeler, P.H. Sisco, A.G. Abbott, and R.R. Sederoff.  
697 2013. A transcriptome-based genetic map of Chinese chestnut (*Castanea mollissima*) and  
698 identification of regions of segmental homology with peach (*Prunus persica*). *Tree Genetics &*  
699 *Genomes* 9: 557–571.

700 Kubisiak, T.L., and J.H. Roberds. 2006. Genetic structure of American chestnut populations  
701 based on neutral DNA markers. In K.C. Steiner and J.E. Carlson [eds.], *Restoration of American*  
702 *Chestnut to Forest Lands – Proceedings of a Conference and Workshop*, The North Carolina  
703 Arboretum, N.C., 2004, 109-122. National Park Service, Washington, DC, USA.

704 Leroy, T., C. Roux, L. Villate, C. Bodénès, J. Romiguier, J.A.P. Paiva, C. Dossat, J.-M. Aury, C.  
705 Plomion, and A. Kremer. 2017. Extensive recent secondary contacts between four European  
706 white oak species. *New Phytologist* 214: 865–878.

707 Li, X., and F. Dane. 2013. Comparative chloroplast and nuclear DNA analysis of *Castanea*  
708 species in the southern region of the USA. *Tree Genetics and Genomes* 9(1): 107–116.

709 Little, E.L. 1979. Checklist of United States trees (native and naturalized), U.S.D.A. Agriculture  
710 Handbook no. 541. U.S. Government Printing Office, Washington, DC, USA.

711 Mallet, J. 2005. Hybridization as an invasion of the genome. *Trends in Ecology and Evolution*  
712 20(5): 229–237.

713 McVay, J.D., A.L. Hipp, and P.S. Manos. 2017. A genetic legacy of introgression confounds  
714 phylogeny and biogeography in oaks. *Proceedings of the Royal Society B* 284: 20170300.

- 715 Nixon, K.C. 1997. Fagaceae Dumortier, Beech Family. *In* Flora of North America Editorial  
716 Committee (eds.). Flora of North America north of Mexico, vol. 3. Oxford University Press,  
717 New York, New York, USA.
- 718 Nuttall, T. 1818. The genera of North American plants, Vol. 2. D. Heart, Philadelphia,  
719 Pennsylvania, USA.
- 720 Owens, G.L., G.J. Baute, and L.H. Rieseberg. 2016. Revisiting a classic case of introgression:  
721 hybridization and gene flow in Californian sunflowers. *Molecular Ecology* 25: 2630–2643.
- 722 Patterson, N., A.L. Price, and D. Reich. 2006. Population structure and eigenanalysis. *PLoS*  
723 *Genetics* 2(12): e190.
- 724 Pritchard, J.K., M. Stephens, and P. Donnelly. 2000. Inference of population structure using  
725 multilocus genotype data. *Genetics* 155: 945–959.
- 726 R Core Team. 2018. R: A language and environment for statistical computing. R Foundation for  
727 Statistical Computing, website: <https://www.R-project.org/> [accessed 01 February 2018].
- 728 Rieseberg, L.H. 1997. Hybrid origins of plant species. *Annual Review of Ecology and*  
729 *Systematics* 28: 359–389.
- 730 Rochette, N.C., and J.M. Catchen. 2017. Deriving genotypes from RAD-seq short-read data  
731 using Stacks. *Nature Protocols* 12: 2640–2659.
- 732 Sargent, C.S. 1919. North American Trees, IV. *Botanical Gazette* 67(3): 208–242.
- 733 Shaw, J., J.H. Craddock, and M.A. Binkley. 2012. Phylogeny and phylogeography of North  
734 American *Castanea* Mill. (Fagaceae) using cpDNA suggests gene sharing in the Southern  
735 Appalachians (*Castanea* Mill., Fagaceae). *Castanea* 77(2): 186–211.
- 736 Small, J.K. 1933. Manual of the Southeastern Flora. The University of North Carolina Press,  
737 Chapel Hill, North Carolina, USA.

- 738 Soltis, P.S., and D.E. Soltis. 2009. The role of hybridization in plant speciation. *Annual Review*  
739 *of Plant Biology* 60: 561–588.
- 740 Stamatakis, A. 2014. RAxML version 8: a tool for phylogenetic analysis and post-analysis of  
741 large phylogenies. *Bioinformatics* 9: 1312–1313.
- 742 Steiner, K.C., J.W. Westbrook, F.V. Hebard, L.L. Georgi, W.A. Powell, and S.F. Fitzsimmons.  
743 2017. Rescue of American chestnut with extraspecific genes following its destruction by a  
744 naturalized pathogen. *New Forests* 48(2): 317–336.
- 745 Stronen, A.V., and P.C. Paquet. 2013. Perspectives on the conservation of wild hybrids.  
746 *Biological Conservation* 167: 390–395.
- 747 Tucker, G.E. 1975. *Castanea pumila* var. *ozarkensis* (Ashe) Tucker, comb. nov. *Arkansas*  
748 *Academy of Science Proceedings* 29: 67–69.
- 749 Turner, K.G., D.I. Huang, Q.C.B. Cronk, and L.H. Rieseberg. 2018. Homogenization of  
750 populations in the wildflower, Texas Bluebonnet (*Lupinus texensis*). *Journal of Heredity* 109(2):  
751 152–161.
- 752 Weakley, A.S. 2015. Flora of the Southern and Mid-Atlantic States. The University of North  
753 Carolina Herbarium, Chapel Hill, North Carolina, USA.
- 754 Weir, B.S., and C.C. Cockerham. 1984. Estimating *F*-statistics for the analysis of population  
755 structure. *Evolution* 38(6): 1358–1370.
- 756 Whitham, T.G., P.A. Morrow, and B.M. Potts. 1991. Conservation of hybrid plants. *Science* 254:  
757 779–780.
- 758 Whitney, K.D., J.R. Ahern, L.G. Campbell, L.P. Albert, and M.S. King. 2010. Patterns of  
759 hybridization in plants. *Perspectives in Plant Ecology, Evolution and Systematics* 12(3): 175–  
760 182.

761 Wu, T.D., and S. Nacu. 2010. Fast and SNP-tolerant detection of complex variants and splicing  
762 in short reads. *Bioinformatics* 26(7): 873–881.

763 Zhao, P., H.-J. Zhou, D. Potter, Y.-H. Hu, X.-J. Feng, M. Dang, L. Feng, S. Zulfiqar, W.-Z. Liu,  
764 G.-F. Zhao, and K. Woeste. 2018. Population genetics, phylogenomics and hybrid speciation of  
765 *Juglans* in China determined from whole chloroplast genomes, transcriptomes, and genotyping-  
766 by-sequencing (GBS). *Molecular Phylogenetics and Evolution* 126: 250–265.

767 Zhebentyayeva, T., V. Shankar, R. Scorza, A. Callahan, M. Ravelonandro, S. Castro, T. DeJong,  
768 C.A. Sasaki, and C. Dardick. 2019. Genetic characterization of world-wide *Prunus domestica*  
769 (plum) germplasm using sequence-based genotyping. *Horticulture Research* 6:12.

770 Zheng, X., D. Levine, J. Shen, S. Gogarten, C. Laurie, and B. Weir. 2012. A high-performance  
771 computing toolset for relatedness and principal component analysis of SNP data. *Bioinformatics*  
772 28: 3326–3328.

773

774

775

776 **APPENDICES**

777 Appendix S1. Sample voucher and NCBI SRA information for individual *Castanea* plants  
 778 genotyped. GBS IDs correspond to sample names in NCBI SRA BioProject ID  
 779 “PRJNA541592”.

780

| County, State or cultivar/selection name | Sample site code | GBS ID | Taxon                               | Herbarium voucher | DNA tube label |
|------------------------------------------|------------------|--------|-------------------------------------|-------------------|----------------|
| Charleston, SC                           | AW               | 1      | <i>C. pumila</i> var. <i>pumila</i> | Perkins 15-1      | AW1            |
| Charleston, SC                           | AW               | 5      | <i>C. pumila</i> var. <i>pumila</i> | Perkins 15-2      | AW2            |
| Charleston, SC                           | AW               | 9      | <i>C. pumila</i> var. <i>pumila</i> | Perkins 15-3      | AW3            |
| Charleston, SC                           | AW               | 13     | <i>C. pumila</i> var. <i>pumila</i> | Perkins 15-4      | AW4            |
| Charleston, SC                           | AW               | 17     | <i>C. pumila</i> var. <i>pumila</i> | Perkins 15-5      | AW5            |
| Charleston, SC                           | AW               | 23     | <i>C. pumila</i> var. <i>pumila</i> | Perkins 15-7      | AW7            |
| Charleston, SC                           | AW               | 28     | <i>C. pumila</i> var. <i>pumila</i> | Perkins 15-8      | AW8            |
| Charleston, SC                           | AW               | 32     | <i>C. pumila</i> var. <i>pumila</i> | Perkins 15-9      | AW9            |
| Charleston, SC                           | AW               | 36     | <i>C. pumila</i> var. <i>pumila</i> | Perkins 15-10     | AW10           |
| Sumter, SC                               | WB               | 41     | <i>C. pumila</i> var. <i>pumila</i> | Perkins 15-11     | WB1            |
| Sumter, SC                               | WB               | 44     | <i>C. pumila</i> var. <i>pumila</i> | Perkins 15-12     | WB2            |
| Transylvania, NC                         | GO               | 18     | <i>C. dentata</i>                   | Perkins 15-13     | G1             |
| Transylvania, NC                         | GO               | 20     | <i>C. pumila</i> var. <i>pumila</i> | Perkins 15-14     | G2             |
| Transylvania, NC                         | GO               | 24     | <i>C. pumila</i> var. <i>pumila</i> | Perkins 15-15     | G3             |
| Oconee, SC                               | CR               | 7      | <i>C. dentata</i>                   | Perkins 15-16     | CR1            |
| Oconee, SC                               | CR               | 11     | <i>C. dentata</i>                   | Perkins 15-17     | CR2            |
| Oconee, SC                               | CR               | 15     | <i>C. pumila</i> var. <i>pumila</i> | Perkins 15-18     | CR3            |
| Oconee, SC                               | CR               | 19     | <i>C. pumila</i> var. <i>pumila</i> | Perkins 15-19     | CR4            |
| Oconee, SC                               | CR               | 21     | <i>C. pumila</i> var. <i>pumila</i> | Perkins 15-20     | CR5            |
| Oconee, SC                               | CR               | 25     | <i>C. pumila</i> var. <i>pumila</i> | Perkins 15-21     | CR6            |
| Oconee, SC                               | CR               | 30     | <i>C. pumila</i> var. <i>pumila</i> | Perkins 15-22     | CR7            |
| Oconee, SC                               | BF               | 29     | <i>C. pumila</i> var. <i>pumila</i> | Perkins 15-23     | BF1            |
| Oconee, SC                               | BF               | 33     | <i>C. pumila</i> var. <i>pumila</i> | Perkins 15-24     | BF2            |
| Oconee, SC                               | BF               | 37     | <i>C. pumila</i> var. <i>pumila</i> | Perkins 15-25     | BF3            |
| Oconee, SC                               | BF               | 42     | <i>C. pumila</i> var. <i>pumila</i> | Perkins 15-26     | BF4            |
| Oconee, SC                               | BF               | 45     | <i>C. dentata</i>                   | Perkins 15-27     | BF5            |
| Oconee, SC                               | BF               | 3      | <i>C. dentata</i>                   | Perkins 15-28     | BF6            |
| Pickens, SC                              | CE               | 2      | <i>C. dentata</i>                   | Perkins 15-29     | CEF1           |
| Pickens, SC                              | CE               | 6      | <i>C. dentata</i>                   | Perkins 15-30     | CEF2           |
| Pickens, SC                              | CE               | 10     | <i>C. dentata</i>                   | Perkins 15-31     | CEF3           |
| Pickens, SC                              | CE               | 14     | <i>C. dentata</i>                   | Perkins 15-32     | CEF4           |
| Suwannee, FL                             | SS               | 80     | <i>C. pumila</i> var. <i>pumila</i> | Perkins 17-1      | SS2            |
| Suwannee, FL                             | SS               | 81     | <i>C. pumila</i> var. <i>pumila</i> | Perkins 17-2      | SS3            |
| Suwannee, FL                             | SS               | 82     | <i>C. pumila</i> var. <i>pumila</i> | Perkins 17-3      | SS4            |

|              |    |    |                                     |               |        |
|--------------|----|----|-------------------------------------|---------------|--------|
| Lincoln, TN  | LI | 83 | <i>C. dentata</i>                   | Perkins 17-4  | TNLIN1 |
| Calhoun, AL  | CH | 90 | <i>C. alabamensis</i>               | Perkins 17-5  | CH21   |
| Calhoun, AL  | CH | 91 | <i>C. dentata</i>                   | Perkins 17-6  | CH22   |
| Calhoun, AL  | CH | 92 | <i>C. alabamensis</i>               | Perkins 17-7  | CH23   |
| Calhoun, AL  | CH | 93 | <i>C. alabamensis</i>               | Perkins 17-8  | CH24   |
| Calhoun, AL  | CH | 94 | <i>C. alabamensis</i>               | Perkins 17-9  | CH25   |
| Calhoun, AL  | CH | 95 | <i>C. alabamensis</i>               | Perkins 17-10 | CH26   |
| Calhoun, AL  | CH | 96 | <i>C. alabamensis</i>               | Perkins 17-11 | CH27   |
| Cleburne, AL | HU | 67 | <i>C. alabamensis</i>               | Perkins 17-12 | H1     |
| Cleburne, AL | HU | 68 | <i>C. dentata</i>                   | Perkins 17-13 | H2     |
| Cleburne, AL | HU | 69 | <i>C. dentata</i>                   | Perkins 17-14 | H3     |
| Cleburne, AL | HU | 70 | <i>C. dentata</i>                   | Perkins 17-15 | H4     |
| Cleburne, AL | HU | 86 | <i>C. alabamensis</i>               | Perkins 17-16 | H9     |
| Cleburne, AL | HU | 89 | <i>C. alabamensis</i>               | Perkins 17-17 | H6     |
| Cleburne, AL | FR | 71 | <i>C. dentata</i>                   | Perkins 17-18 | F1     |
| Cleburne, AL | FR | 72 | <i>C. dentata</i>                   | Perkins 17-19 | F5     |
| Cleburne, AL | FR | 84 | <i>C. dentata</i>                   | Perkins 17-20 | F3     |
| Clay, AL     | AG | 73 | <i>C. alabamensis</i>               | Perkins 17-21 | AG1    |
| Clay, AL     | AG | 74 | <i>C. dentata</i>                   | Perkins 17-22 | AG2    |
| Clay, AL     | AG | 75 | <i>C. alabamensis</i>               | Perkins 17-23 | AG3    |
| Clay, AL     | AG | 76 | <i>C. alabamensis</i>               | Perkins 17-24 | AG6    |
| Clay, AL     | AG | 77 | <i>C. dentata</i>                   | Perkins 17-25 | AG7    |
| Clay, AL     | AG | 85 | <i>C. alabamensis</i>               | Perkins 17-26 | AG4    |
| Clay, AL     | AG | 87 | <i>C. alabamensis</i>               | Perkins 17-27 | AG5    |
| Morgan, AL   | LA | 78 | <i>C. dentata</i>                   | Perkins 17-28 | L14    |
| Morgan, AL   | LA | 79 | <i>C. dentata</i>                   | Perkins 17-29 | L19    |
| Morgan, AL   | LA | 88 | <i>C. dentata</i>                   | Perkins 17-30 | L10    |
| Floyd, GA    | JM | 22 | <i>C. alabamensis</i>               | Binkley 412   | 412    |
| Floyd, GA    | PO | 38 | <i>C. alabamensis</i>               | Binkley 420   | 420    |
| Cherokee, NC | JB | 50 | <i>C. dentata</i>                   | Binkley 507   | 507    |
| Cherokee, NC | JB | 51 | <i>C. dentata</i>                   | Binkley 513   | 513    |
| Cherokee, NC | JB | 52 | <i>C. dentata</i>                   | Binkley 514   | 514    |
| Cherokee, NC | SE | 53 | <i>C. pumila</i> var. <i>pumila</i> | Binkley 124   | 124    |
| Cherokee, NC | SE | 54 | <i>C. pumila</i> var. <i>pumila</i> | Binkley 525   | 525    |
| Cherokee, NC | SE | 55 | <i>C. pumila</i> var. <i>pumila</i> | Binkley 126   | 126    |
| Cherokee, NC | SE | 56 | <i>C. pumila</i> var. <i>pumila</i> | Binkley 527   | 527    |
| Cherokee, NC | SE | 57 | <i>C. pumila</i> var. <i>pumila</i> | Binkley 528   | 528    |
| Cherokee, NC | SE | 58 | <i>C. pumila</i> var. <i>pumila</i> | Binkley 529   | 529    |
| Cherokee, NC | SE | 59 | <i>C. dentata</i>                   | Binkley 531   | 531    |
| Cherokee, NC | SE | 60 | <i>C. pumila</i> var. <i>pumila</i> | Binkley 532   | 532    |
| Cherokee, NC | SE | 61 | <i>C. pumila</i> var. <i>pumila</i> | Binkley 535   | 535    |
| Cherokee, NC | SE | 62 | <i>C. pumila</i> var. <i>pumila</i> | Binkley 149   | 149    |
| Baker, GA    | JR | 26 | <i>C. pumila</i> var. <i>pumila</i> | Binkley 735   | 735    |
| Pickens, GA  | TM | 27 | <i>C. dentata</i>                   | Binkley 645   | 645    |
| Pickens, GA  | TM | 31 | <i>C. dentata</i>                   | Binkley 646   | 646    |

|                             |    |     |                                           |                      |              |
|-----------------------------|----|-----|-------------------------------------------|----------------------|--------------|
| Pickens, GA                 | TM | 35  | <i>C. pumila</i> var. <i>pumila</i>       | Binkley 647          | 647          |
| Pickens, GA                 | TM | 40  | <i>C. pumila</i> var. <i>pumila</i>       | Binkley 648          | 648          |
| Pickens, GA                 | TM | 43  | <i>C. pumila</i> var. <i>pumila</i>       | Binkley 649          | 649          |
| Pickens, GA                 | TM | 46  | <i>C. pumila</i> var. <i>pumila</i>       | Binkley 650          | 650          |
| Pickens, GA                 | TM | 47  | <i>C. pumila</i> var. <i>pumila</i>       | Binkley 651          | 651          |
| Pickens, GA                 | TM | 48  | <i>C. pumila</i> var. <i>pumila</i>       | Binkley 652          | 652          |
| Pickens, GA                 | TM | 49  | <i>C. pumila</i> var. <i>pumila</i>       | Binkley 653          | 653          |
| Knox, ME                    | KN | 34  | <i>C. dentata</i>                         | Binkley 671          | 671          |
| Piscataquis, ME             | AT | 39  | <i>C. dentata</i>                         | Binkley 672          | 672          |
| Waldo, ME                   | WA | 65  | <i>C. dentata</i>                         | Binkley 673          | 673          |
| Piscataquis, ME             | SB | 66  | <i>C. dentata</i>                         | Binkley 674          | 674          |
| Huntingdon, PA              | RO | 4   | <i>C. dentata</i>                         | Binkley 669          | 669          |
| Warren, PA                  | WR | 8   | <i>C. dentata</i>                         | Binkley 710          | 710          |
| Westmoreland, PA            | WE | 12  | <i>C. dentata</i>                         | Binkley 675          | 675          |
| Sharp, AR                   | SH | 64  | <i>C. pumila</i> var. <i>ozarkensis</i>   | Binkley 705          | 705          |
| Lawrence, MO                | MO | 63  | <i>ozarkensis</i> complex hybrid          | Binkley 694          | 694          |
| Adair, KY                   | KY | 16  | <i>dentata</i> - <i>mollissima</i> hybrid | NA                   | KYADA1       |
| Buncombe, NC                | DO | 102 | <i>C. dentata</i>                         | Sisco & Perkins 15-1 | NCDOT        |
| Avery, NC                   | CB | 103 | <i>C. dentata</i>                         | NA                   | Cranberry    |
| Washington, VA              | WN | 97  | <i>C. dentata</i>                         | NA                   | AD98         |
| cultivar 'Nanking'          | NK | 100 | <i>C. mollissima</i>                      | NA                   | Nanking      |
| cultivar 'Mahogany'         | MY | 98  | <i>C. mollissima</i>                      | NA                   | Mahogany     |
| selection 'Fort Defiance'   | FD | 104 | <i>C. crenata</i>                         | NA                   | Ft. Defiance |
| selection 'Morrow Mountain' | MM | 107 | <i>C. crenata</i>                         | NA                   | Morrow Mtn.  |
| selection 'Rita 1'          | RI | 108 | <i>C. crenata</i>                         | NA                   | Rita 1       |
| selection 'Rita 2'          | RA | 110 | <i>C. crenata</i>                         | NA                   | Rita 2       |

781

782

783

784

785

786

787

788 Appendix S2. Annotations of plants studied by Binkley (2008), Shaw et al. (2012), and Li and  
 789 Dane (2013). Two plants from the study of Binkley (2008) and Shaw et al. (2012) were  
 790 genotyped here. Herbarium vouchers from all plants listed below were assessed for  
 791 morphological traits listed in Table 1 and annotated.

792

| County, State | Sample site      | Sample ID in previous study | Taxonomic determination of previous study | Reference                          | Taxonomic determination of present study | Herbarium voucher | Sample ID in present study |
|---------------|------------------|-----------------------------|-------------------------------------------|------------------------------------|------------------------------------------|-------------------|----------------------------|
| Floyd, GA     | the Pocket       | 420                         | <i>C. x neglecta</i>                      | Binkley (2008); Shaw et al. (2012) | <i>C. alabamensis</i>                    | Binkley 420       | PO38_AL                    |
| Floyd, GA     | Johns Mountain   | 412                         | <i>C. x neglecta</i>                      | Binkley (2008); Shaw et al. (2012) | <i>C. alabamensis</i>                    | Binkley 412       | JM22_AL                    |
| Jefferson, AL | Ruffner Mountain | AL-M65                      | Type II <i>C. dentata</i>                 | Li and Dane (2013)                 | <i>C. alabamensis</i>                    | Perkins 15-101    | Not genotyped              |
| Jefferson, AL | Ruffner Mountain | AL-M35                      | Type II <i>C. dentata</i>                 | Li and Dane (2013)                 | <i>C. alabamensis</i>                    | Perkins 15-102    | Not genotyped              |
| Jefferson, AL | Ruffner Mountain | AL-M38                      | Type I <i>C. dentata</i>                  | Li and Dane (2013)                 | <i>C. dentata</i>                        | Deason MS38       | Not genotyped              |
| Jefferson, AL | Ruffner Mountain | AL-M68                      | Type II <i>C. dentata</i>                 | Li and Dane (2013)                 | <i>C. alabamensis</i>                    | Deason MS68       | Not genotyped              |
| Jefferson, AL | Ruffner Mountain | AL-4CN                      | Type I <i>C. dentata</i>                  | Li and Dane (2013)                 | <i>C. dentata</i>                        | Deason 4CN        | Not genotyped              |
| Jefferson, AL | Ruffner Mountain | AL-7CN                      | Type I <i>C. dentata</i>                  | Li and Dane (2013)                 | <i>C. dentata</i>                        | Deason 7CN        | Not genotyped              |

793

794

795

796

797

798

799

800

801



802 Appendix S3. Herbarium accessions housed at the University of North Carolina Chapel Hill  
 803 Herbarium (NCU) that were assessed for morphological characters and annotated. Vouchers  
 804 collected by W.W. Ashe and used for his description of *C. alabamensis* are denoted with  
 805 “collected by W.W. Ashe” in the identification remarks column. SERNEC catalog numbers are  
 806 unique to each accession in the Southeast Regional Network of Expertise and Collections  
 807 (SERNEC) project. Images of each accession, along with locality and collector information, can  
 808 be accessed at the SERNEC website: <http://sernecportal.org/portal/index.php>.  
 809

| SERNEC catalog number | Taxonomic determination by Perkins et al. | Identification remarks |
|-----------------------|-------------------------------------------|------------------------|
| NCU00153249           | <i>Castanea pumila</i> var. <i>pumila</i> |                        |
| NCU00153250           | <i>Castanea pumila</i> var. <i>pumila</i> |                        |
| NCU00153251           | <i>Castanea pumila</i> var. <i>pumila</i> |                        |
| NCU00153252           | <i>Castanea pumila</i> var. <i>pumila</i> |                        |
| NCU00153253           | <i>Castanea pumila</i> var. <i>pumila</i> |                        |
| NCU00153254           | <i>Castanea pumila</i> var. <i>pumila</i> |                        |
| NCU00153255           | <i>Castanea pumila</i> var. <i>pumila</i> |                        |
| NCU00153248           | <i>Castanea pumila</i> var. <i>pumila</i> |                        |
| NCU00153247           | <i>Castanea pumila</i> var. <i>pumila</i> |                        |
| NCU00153241           | <i>Castanea pumila</i> var. <i>pumila</i> |                        |
| NCU00153242           | <i>Castanea pumila</i> var. <i>pumila</i> |                        |
| NCU00153243           | <i>Castanea pumila</i> var. <i>pumila</i> |                        |
| NCU00153244           | <i>Castanea pumila</i> var. <i>pumila</i> |                        |
| NCU00153246           | <i>Castanea pumila</i> var. <i>pumila</i> |                        |
| NCU00153238           | <i>Castanea pumila</i> var. <i>pumila</i> |                        |
| NCU00153239           | <i>Castanea pumila</i> var. <i>pumila</i> |                        |
| NCU00153240           | <i>Castanea pumila</i> var. <i>pumila</i> |                        |
| NCU00153231           | <i>Castanea pumila</i> var. <i>pumila</i> |                        |
| NCU00153232           | <i>Castanea pumila</i> var. <i>pumila</i> |                        |
| NCU00153233           | <i>Castanea pumila</i> var. <i>pumila</i> |                        |
| NCU00153235           | <i>Castanea pumila</i> var. <i>pumila</i> |                        |
| NCU00153237           | <i>Castanea pumila</i> var. <i>pumila</i> |                        |
| NCU00027970           | <i>Castanea pumila</i> var. <i>pumila</i> |                        |
| NCU00153211           | <i>Castanea pumila</i> var. <i>pumila</i> |                        |
| NCU00153212           | <i>Castanea pumila</i> var. <i>pumila</i> |                        |
| NCU00153213           | <i>Castanea pumila</i> var. <i>pumila</i> |                        |
| NCU00113544           | <i>Castanea pumila</i> var. <i>pumila</i> |                        |
| NCU00153215           | <i>Castanea pumila</i> var. <i>pumila</i> |                        |
| NCU00153216           | <i>Castanea pumila</i> var. <i>pumila</i> |                        |
| NCU00153217           | <i>Castanea pumila</i> var. <i>pumila</i> |                        |
| NCU00153204           | <i>Castanea pumila</i> var. <i>pumila</i> |                        |
| NCU00153199           | <i>Castanea pumila</i> var. <i>pumila</i> |                        |
| NCU00153130           | <i>Castanea dentata</i>                   |                        |
| NCU00153128           | <i>Castanea dentata</i>                   |                        |
| NCU00153127           | <i>Castanea dentata</i>                   |                        |

|             |                             |                                                                                                                                |
|-------------|-----------------------------|--------------------------------------------------------------------------------------------------------------------------------|
| NCU00153125 | Castanea dentata            |                                                                                                                                |
| NCU00153124 | Castanea dentata            |                                                                                                                                |
| NCU00153123 | Castanea dentata            |                                                                                                                                |
| NCU00153057 | Castanea dentata            |                                                                                                                                |
| NCU00153131 | Castanea dentata            | Occasional simple trichome at leaf margin                                                                                      |
| NCU00153058 | Castanea dentata            |                                                                                                                                |
| NCU00153132 | Castanea dentata            |                                                                                                                                |
| NCU00153048 | Castanea dentata            |                                                                                                                                |
| NCU00027754 | Castanea dentata            |                                                                                                                                |
| NCU00153049 | Castanea dentata            |                                                                                                                                |
| NCU00145692 | Castanea dentata            | Rare stellate trichome                                                                                                         |
| NCU00153136 | Castanea dentata            |                                                                                                                                |
| NCU00153134 | Castanea dentata            | Rare stellate trichome                                                                                                         |
| NCU00153133 | Castanea dentata            |                                                                                                                                |
| NCU00153060 | Castanea dentata            |                                                                                                                                |
| NCU00153897 | Castanea dentata            |                                                                                                                                |
| NCU00153822 | Castanea pumila var. pumila |                                                                                                                                |
| NCU00153823 | Castanea pumila var. pumila |                                                                                                                                |
| NCU00153814 | Castanea pumila var. pumila |                                                                                                                                |
| NCU00153809 | Castanea pumila var. pumila | Specimen has section of stolon<br>But see Harbison's note re: "C. alnifolia past blooming while ashei is yet in full bloom..." |
| NCU00153811 | Castanea pumila var. pumila |                                                                                                                                |
| NCU00153798 | Castanea pumila var. pumila |                                                                                                                                |
| NCU00153947 | Castanea pumila var. pumila |                                                                                                                                |
| NCU00153800 | Castanea pumila var. pumila |                                                                                                                                |
| NCU00153799 | Castanea pumila var. pumila |                                                                                                                                |
| NCU00153794 | Castanea pumila var. pumila |                                                                                                                                |
| NCU00153796 | Castanea pumila var. pumila |                                                                                                                                |
| NCU00153804 | Castanea pumila var. pumila |                                                                                                                                |
| NCU00153806 | Castanea pumila var. pumila |                                                                                                                                |
| NCU00153813 | Castanea pumila var. pumila |                                                                                                                                |
| NCU00153812 | Castanea pumila var. pumila |                                                                                                                                |
| NCU00153802 | Castanea pumila var. pumila |                                                                                                                                |
| NCU00153807 | Castanea pumila var. pumila |                                                                                                                                |
| NCU00153144 | Castanea dentata            |                                                                                                                                |
| NCU00153143 | Castanea dentata            |                                                                                                                                |
| NCU00153140 | Castanea dentata            |                                                                                                                                |
| NCU00153139 | Castanea dentata            |                                                                                                                                |
| NCU00153138 | Castanea dentata            |                                                                                                                                |
| NCU00153160 | Castanea dentata            |                                                                                                                                |
| NCU00153209 | Castanea pumila var. pumila |                                                                                                                                |
| NCU00153208 | Castanea pumila var. pumila |                                                                                                                                |
| NCU00153207 | Castanea pumila var. pumila |                                                                                                                                |

|             |                             |
|-------------|-----------------------------|
| NCU00153206 | Castanea pumila var. pumila |
| NCU00153205 | Castanea pumila var. pumila |
| NCU00153220 | Castanea pumila var. pumila |
| NCU00055657 | Castanea pumila var. pumila |
| NCU00153229 | Castanea pumila var. pumila |
| NCU00153228 | Castanea pumila var. pumila |
| NCU00153227 | Castanea pumila var. pumila |
| NCU00153225 | Castanea pumila var. pumila |
| NCU00153223 | Castanea pumila var. pumila |
| NCU00153222 | Castanea pumila var. pumila |
| NCU00153221 | Castanea pumila var. pumila |
| NCU00153192 | Castanea pumila var. pumila |
| NCU00008712 | Castanea pumila var. pumila |
| NCU00153190 | Castanea pumila var. pumila |
| NCU00093627 | Castanea pumila var. pumila |
| NCU00153189 | Castanea pumila var. pumila |
| NCU00153188 | Castanea pumila var. pumila |
| NCU00153187 | Castanea pumila var. pumila |
| NCU00153193 | Castanea pumila var. pumila |
| NCU00153198 | Castanea pumila var. pumila |
| NCU00153197 | Castanea pumila var. pumila |
| NCU00153196 | Castanea pumila var. pumila |
| NCU00153194 | Castanea pumila var. pumila |
| NCU00008710 | Castanea pumila var. pumila |
| NCU00153203 | Castanea pumila var. pumila |
| NCU00153202 | Castanea pumila var. pumila |
| NCU00153201 | Castanea pumila var. pumila |
| NCU00153792 | Castanea pumila var. pumila |
| NCU00153420 | Castanea pumila var. pumila |
| NCU00153781 | Castanea pumila var. pumila |
| NCU00153782 | Castanea pumila var. pumila |
| NCU00153784 | Castanea pumila var. pumila |
| NCU00153790 | Castanea pumila var. pumila |
| NCU00153788 | Castanea pumila var. pumila |
| NCU00153789 | Castanea pumila var. pumila |
| NCU00153787 | Castanea pumila var. pumila |
| NCU00153793 | Castanea pumila var. pumila |
| NCU00153867 | Castanea dentata            |
| NCU00153866 | Castanea dentata            |
| NCU00153864 | Castanea dentata            |
| NCU00153862 | Castanea dentata            |
| NCU00153861 | Castanea dentata            |
| NCU00153860 | Castanea dentata            |
| NCU00153859 | Castanea dentata            |
| NCU00153403 | Castanea pumila var. pumila |

|             |                                           |                                                                                                                                                                                                                                                                                |
|-------------|-------------------------------------------|--------------------------------------------------------------------------------------------------------------------------------------------------------------------------------------------------------------------------------------------------------------------------------|
| NCU00153379 | <i>Castanea pumila</i> var. <i>pumila</i> |                                                                                                                                                                                                                                                                                |
| NCU00153946 | <i>Castanea pumila</i> var. <i>pumila</i> | Tips of leaves not acuminate, cupules four per spike.                                                                                                                                                                                                                          |
| NCU00153378 | <i>Castanea pumila</i> var. <i>pumila</i> |                                                                                                                                                                                                                                                                                |
| NCU00153377 | <i>Castanea pumila</i> var. <i>pumila</i> |                                                                                                                                                                                                                                                                                |
| NCU00153387 | <i>Castanea pumila</i> var. <i>pumila</i> |                                                                                                                                                                                                                                                                                |
| NCU00153376 | <i>Castanea pumila</i> var. <i>pumila</i> |                                                                                                                                                                                                                                                                                |
| NCU00153392 | <i>Castanea pumila</i> var. <i>pumila</i> |                                                                                                                                                                                                                                                                                |
| NCU00153391 | <i>Castanea pumila</i> var. <i>pumila</i> |                                                                                                                                                                                                                                                                                |
| NCU00153389 | <i>Castanea pumila</i> var. <i>pumila</i> |                                                                                                                                                                                                                                                                                |
| NCU00153401 | <i>Castanea pumila</i> var. <i>pumila</i> |                                                                                                                                                                                                                                                                                |
| NCU00153400 | <i>Castanea pumila</i> var. <i>pumila</i> |                                                                                                                                                                                                                                                                                |
| NCU00153399 | <i>Castanea pumila</i> var. <i>pumila</i> |                                                                                                                                                                                                                                                                                |
| NCU00153398 | <i>Castanea pumila</i> var. <i>pumila</i> |                                                                                                                                                                                                                                                                                |
| NCU00153396 | <i>Castanea pumila</i> var. <i>pumila</i> |                                                                                                                                                                                                                                                                                |
| NCU00153395 | <i>Castanea pumila</i> var. <i>pumila</i> |                                                                                                                                                                                                                                                                                |
| NCU00153393 | <i>Castanea pumila</i> var. <i>pumila</i> |                                                                                                                                                                                                                                                                                |
| NCU00153406 | <i>Castanea pumila</i> var. <i>pumila</i> |                                                                                                                                                                                                                                                                                |
| NCU00153175 | <i>Castanea pumila</i> var. <i>pumila</i> | Abaxial leaf surfaces densely covered with stellate trichomes. Deep sinuses along leaf margin. Our population genomic work demonstrates that plants with similar morphology from Blue Ridge region of NC are not hybrids.                                                      |
| NCU00153173 | <i>Castanea pumila</i> var. <i>pumila</i> | Leaf shape is lanceolate, like commonly seen in <i>C. dentata</i> , and abaxial surface is densely covered with stellate trichomes, like commonly seen in <i>C. pumila</i> . Yet our population genomic work demonstrates that plants with similar morphology are not hybrids. |
| NCU00153176 | <i>Castanea x neglecta</i>                | Note mixture of stellate trichomes and long, simple trichomes on abaxial surface; long, adpressed, simple trichomes on leaf veins.                                                                                                                                             |
| NCU00129230 | <i>Castanea mollissima</i>                |                                                                                                                                                                                                                                                                                |
| NCU00153896 | <i>Castanea dentata</i>                   |                                                                                                                                                                                                                                                                                |
| NCU00153895 | <i>Castanea mollissima</i>                |                                                                                                                                                                                                                                                                                |
| NCU00153894 | <i>Castanea dentata</i>                   |                                                                                                                                                                                                                                                                                |
| NCU00153893 | <i>Castanea dentata</i>                   |                                                                                                                                                                                                                                                                                |
| NCU00153892 | <i>Castanea dentata</i>                   |                                                                                                                                                                                                                                                                                |
| NCU00050100 | <i>Castanea alabamensis</i>               | Collected by W.W. Ashe                                                                                                                                                                                                                                                         |
| NCU00053434 | <i>Castanea alabamensis</i>               | Collected by W.W. Ashe                                                                                                                                                                                                                                                         |

|             |                                               |                                                                                                                                                                                                       |
|-------------|-----------------------------------------------|-------------------------------------------------------------------------------------------------------------------------------------------------------------------------------------------------------|
| NCU00050202 | <i>Castanea alabamensis</i>                   |                                                                                                                                                                                                       |
| NCU00053426 | <i>Castanea alabamensis</i>                   | Collected by W.W. Ashe                                                                                                                                                                                |
| NCU00053427 | <i>Castanea alabamensis</i>                   | Collected by W.W. Ashe                                                                                                                                                                                |
| NCU00053423 | <i>Castanea pumila</i> var. <i>pumila</i>     | Note 10 cupules per spike, slender twigs, and stellate interveinal trichomes on abaxial surface.                                                                                                      |
| NCU00053421 | <i>Castanea pumila</i> var. <i>pumila</i>     | Note stellate trichomes on interveinal lamina of abaxial surface.                                                                                                                                     |
| NCU00053420 | <i>Castanea alabamensis</i>                   | Collected by W.W. Ashe                                                                                                                                                                                |
| NCU00053410 | <i>Castanea pumila</i> var. <i>ozarkensis</i> |                                                                                                                                                                                                       |
| NCU00053415 | <i>Castanea pumila</i> var. <i>ozarkensis</i> |                                                                                                                                                                                                       |
| NCU00053404 | <i>Castanea pumila</i> var. <i>ozarkensis</i> |                                                                                                                                                                                                       |
| NCU00082746 | <i>Castanea pumila</i> var. <i>ozarkensis</i> |                                                                                                                                                                                                       |
| NCU00053424 | <i>Castanea pumila</i> var. <i>pumila</i>     |                                                                                                                                                                                                       |
| NCU00053409 | <i>Castanea pumila</i> var. <i>ozarkensis</i> |                                                                                                                                                                                                       |
| NCU00053416 | <i>Castanea pumila</i> var. <i>pumila</i>     | See stellate trichomes on abaxial lamina.                                                                                                                                                             |
| NCU00053425 | <i>Castanea pumila</i> var. <i>pumila</i>     | See stellate trichomes on abaxial lamina, slender twigs, and four cupules on spike.                                                                                                                   |
| NCU00053417 | <i>Castanea pumila</i> var. <i>pumila</i>     | See stellate trichomes on abaxial lamina.                                                                                                                                                             |
| NCU00053411 | <i>Castanea pumila</i> var. <i>ozarkensis</i> |                                                                                                                                                                                                       |
| NCU00053408 | <i>Castanea pumila</i> var. <i>ozarkensis</i> |                                                                                                                                                                                                       |
| NCU00053414 | <i>Castanea pumila</i> var. <i>ozarkensis</i> |                                                                                                                                                                                                       |
| NCU00053403 | <i>Castanea pumila</i> var. <i>ozarkensis</i> | Has stellate trichomes on lamina surface. Has simple adpressed trichomes on veins. On young, unexpanded leaves, it appears that abaxial lamina has simple trichomes, but these are actually on veins. |
| NCU00053407 | <i>Castanea pumila</i> var. <i>ozarkensis</i> |                                                                                                                                                                                                       |
| NCU00053412 | <i>Castanea pumila</i> var. <i>ozarkensis</i> |                                                                                                                                                                                                       |
| NCU00053406 | <i>Castanea pumila</i> var. <i>ozarkensis</i> |                                                                                                                                                                                                       |
| NCU00053405 | <i>Castanea pumila</i> var. <i>ozarkensis</i> |                                                                                                                                                                                                       |
| NCU00053431 | <i>Castanea alabamensis</i>                   | Collected by W.W. Ashe. Note complete absence of stellate trichomes on abaxial lamina. Note ciliate leaf margin. Note glabrous, glaucous abaxial lamina.                                              |
| NCU00053429 | <i>Castanea alabamensis</i>                   | Collected by Mrs. H.J. McDowell for W.W. Ashe. Note ciliate leaf margin, absence of trichomes on abaxial lamina, presence of simple trichomes on veins only.                                          |

|             |                                           |                                                                                                                                           |
|-------------|-------------------------------------------|-------------------------------------------------------------------------------------------------------------------------------------------|
| NCU00053428 | <i>Castanea alabamensis</i>               | Collected by W.W. Ashe. Note presence of leaf trichomes only on blade margin and veins. Complete absence of stellate trichomes on leaves. |
| NCU00053433 | <i>Castanea alabamensis</i>               | Collected by W.W. Ashe                                                                                                                    |
| NCU00050092 | <i>Castanea alabamensis</i>               | Collected by Mrs. H.J. McDowell for W.W. Ashe                                                                                             |
| NCU00050093 | <i>Castanea alabamensis</i>               | Collected by Mrs. H.J. McDowell for W.W. Ashe                                                                                             |
| NCU00050094 | <i>Castanea alabamensis</i>               | Collected by W.W. Ashe. Ciliate leaf margin. No stellate trichomes on abaxial lamina. Simple trichomes on veins of abaxial leaf surface.  |
| NCU00050095 | <i>Castanea alabamensis</i>               | Collected by W.W. Ashe                                                                                                                    |
| NCU00050096 | <i>Castanea alabamensis</i>               | Collected by W.W. Ashe                                                                                                                    |
| NCU00053432 | <i>Castanea alabamensis</i>               | Collected by W.W. Ashe                                                                                                                    |
| NCU00050097 | <i>Castanea pumila</i> var. <i>pumila</i> | Note stellate trichomes on abaxial lamina of leaves from both plants represented on this sheet.                                           |
| NCU00050098 | <i>Castanea pumila</i> var. <i>pumila</i> | Note stellate trichomes on abaxial lamina.                                                                                                |
| NCU00153328 | <i>Castanea pumila</i> var. <i>pumila</i> |                                                                                                                                           |
| NCU00085046 | <i>Castanea pumila</i> var. <i>pumila</i> |                                                                                                                                           |
| NCU00153327 | <i>Castanea pumila</i> var. <i>pumila</i> |                                                                                                                                           |
| NCU00153326 | <i>Castanea pumila</i> var. <i>pumila</i> |                                                                                                                                           |
| NCU00153325 | <i>Castanea pumila</i> var. <i>pumila</i> |                                                                                                                                           |
| NCU00153323 | <i>Castanea pumila</i> var. <i>pumila</i> |                                                                                                                                           |
| NCU00153322 | <i>Castanea pumila</i> var. <i>pumila</i> |                                                                                                                                           |
| NCU00153321 | <i>Castanea pumila</i> var. <i>pumila</i> |                                                                                                                                           |
| NCU00153891 | <i>Castanea dentata</i>                   |                                                                                                                                           |
| NCU00153890 | <i>Castanea dentata</i>                   |                                                                                                                                           |
| NCU00153936 | <i>Castanea mollissima</i>                |                                                                                                                                           |
| NCU00153935 | <i>Castanea mollissima</i>                |                                                                                                                                           |
| NCU00153934 | <i>Castanea mollissima</i>                |                                                                                                                                           |
| NCU00008707 | <i>Castanea mollissima</i>                |                                                                                                                                           |
| NCU00153937 | <i>Castanea mollissima</i>                |                                                                                                                                           |
| NCU00153940 | <i>Castanea mollissima</i>                |                                                                                                                                           |
| NCU00153939 | <i>Castanea mollissima</i>                |                                                                                                                                           |
| NCU00008708 | <i>Castanea mollissima</i>                |                                                                                                                                           |
| NCU00153838 | <i>Castanea dentata</i>                   |                                                                                                                                           |
| NCU00153837 | <i>Castanea dentata</i>                   |                                                                                                                                           |
| NCU00153836 | <i>Castanea dentata</i>                   |                                                                                                                                           |
| NCU00153786 | <i>Castanea pumila</i> var. <i>pumila</i> |                                                                                                                                           |
| NCU00153785 | <i>Castanea pumila</i> var. <i>pumila</i> |                                                                                                                                           |
| NCU00153858 | <i>Castanea dentata</i>                   |                                                                                                                                           |

|             |                             |                                                                                                                                                                                                                                                                              |
|-------------|-----------------------------|------------------------------------------------------------------------------------------------------------------------------------------------------------------------------------------------------------------------------------------------------------------------------|
| NCU00153857 | Castanea dentata            |                                                                                                                                                                                                                                                                              |
| NCU00153856 | Castanea dentata            |                                                                                                                                                                                                                                                                              |
| NCU00153881 | Castanea dentata            |                                                                                                                                                                                                                                                                              |
| NCU00153880 | Castanea dentata            |                                                                                                                                                                                                                                                                              |
| NCU00153879 | Castanea dentata            |                                                                                                                                                                                                                                                                              |
| NCU00153878 | Castanea dentata            |                                                                                                                                                                                                                                                                              |
| NCU00153876 | Castanea dentata            |                                                                                                                                                                                                                                                                              |
| NCU00153874 | Castanea dentata            |                                                                                                                                                                                                                                                                              |
| NCU00153872 | Castanea pumila var. pumila | Note the abundant stellate trichomes on abaxial leaf surface, erect simple trichomes on abaxial midrib, and ciliate leaf margin.                                                                                                                                             |
| NCU00153874 | Castanea dentata            |                                                                                                                                                                                                                                                                              |
| NCU00153871 | Castanea dentata            |                                                                                                                                                                                                                                                                              |
| NCU00153870 | Castanea dentata            |                                                                                                                                                                                                                                                                              |
| NCU00153869 | Castanea dentata            |                                                                                                                                                                                                                                                                              |
| NCU00153868 | Castanea dentata            |                                                                                                                                                                                                                                                                              |
| NCU00153908 | Castanea dentata            |                                                                                                                                                                                                                                                                              |
| NCU00153907 | Castanea dentata            |                                                                                                                                                                                                                                                                              |
| NCU00153906 | Castanea dentata            |                                                                                                                                                                                                                                                                              |
| NCU00153905 | Castanea dentata            |                                                                                                                                                                                                                                                                              |
| NCU00153904 | Castanea dentata            |                                                                                                                                                                                                                                                                              |
| NCU00140424 | Castanea alabamensis        | Note ciliate leaf margin and abundant, erect, simple trichomes on leaf abaxial veins.                                                                                                                                                                                        |
| NCU00153903 | Castanea alabamensis        | Note ciliate leaf margin and abundant, erect, simple trichomes on leaf abaxial veins.                                                                                                                                                                                        |
| NCU00153901 | Castanea alabamensis        | Note ciliate leaf margin and abundant, erect, simple trichomes on leaf abaxial veins.                                                                                                                                                                                        |
| NCU00153900 | Castanea dentata            | Note eciliate leaf margin, abundant glandular trichomes on abaxial leaf surface, and occasional appressed trichome on abaxial leaf veins.                                                                                                                                    |
| NCU00153899 | Castanea dentata            | Although simple trichomes are infrequently present on leaf margin, there are far fewer trichomes here than is found <i>C. alabamensis</i> . Also note long, typically appressed trichomes on abaxial leaf veins and lack of erect, simple trichomes on abaxial leaf surface. |
| NCU00153898 | Castanea dentata            |                                                                                                                                                                                                                                                                              |

|             |                             |                                                                                                                                                      |
|-------------|-----------------------------|------------------------------------------------------------------------------------------------------------------------------------------------------|
| NCU00153909 | Castanea dentata            | Note frequent glandular trichomes on abaxial leaf surface, eciliate leaf margin, and long, often appressed, simple trichomes on abaxial leaf midrib. |
| NCU00153912 | Castanea dentata            |                                                                                                                                                      |
| NCU00153911 | Castanea dentata            |                                                                                                                                                      |
| NCU00153910 | Castanea dentata            |                                                                                                                                                      |
| NCU00153259 | Castanea pumila var. pumila |                                                                                                                                                      |
| NCU00153258 | Castanea pumila var. pumila |                                                                                                                                                      |
| NCU00153257 | Castanea pumila var. pumila |                                                                                                                                                      |
| NCU00153263 | Castanea pumila var. pumila |                                                                                                                                                      |
| NCU00153260 | Castanea pumila var. pumila |                                                                                                                                                      |
| NCU00153270 | Castanea pumila var. pumila |                                                                                                                                                      |
| NCU00153268 | Castanea pumila var. pumila |                                                                                                                                                      |
| NCU00153266 | Castanea pumila var. pumila |                                                                                                                                                      |
| NCU00153264 | Castanea pumila var. pumila |                                                                                                                                                      |
| NCU00153414 | Castanea pumila var. pumila |                                                                                                                                                      |
| NCU00153278 | Castanea pumila var. pumila |                                                                                                                                                      |
| NCU00153277 | Castanea pumila var. pumila |                                                                                                                                                      |
| NCU00116436 | Castanea pumila var. pumila |                                                                                                                                                      |
| NCU00116437 | Castanea pumila var. pumila |                                                                                                                                                      |
| NCU00153271 | Castanea pumila var. pumila |                                                                                                                                                      |
| NCU00153281 | Castanea pumila var. pumila |                                                                                                                                                      |
| NCU00153282 | Castanea pumila var. pumila |                                                                                                                                                      |
| NCU00153280 | Castanea pumila var. pumila |                                                                                                                                                      |
| NCU00153287 | Castanea pumila var. pumila |                                                                                                                                                      |
| NCU00153285 | Castanea pumila var. pumila |                                                                                                                                                      |
| NCU00153284 | Castanea pumila var. pumila |                                                                                                                                                      |
| NCU00075919 | Castanea pumila var. pumila |                                                                                                                                                      |
| NCU00153291 | Castanea pumila var. pumila |                                                                                                                                                      |
| NCU00153290 | Castanea pumila var. pumila |                                                                                                                                                      |
| NCU00153288 | Castanea pumila var. pumila |                                                                                                                                                      |
| NCU00153149 | Castanea dentata            |                                                                                                                                                      |
| NCU00153151 | Castanea dentata            |                                                                                                                                                      |
| NCU00153152 | Castanea dentata            |                                                                                                                                                      |
| NCU00153153 | Castanea dentata            |                                                                                                                                                      |
| NCU00153154 | Castanea dentata            |                                                                                                                                                      |
| NCU00135776 | Castanea pumila var. pumila | Note abundant stellate trichomes on abaxial leaf surface.                                                                                            |
| NCU00153157 | Castanea dentata            |                                                                                                                                                      |
| NCU00153158 | Castanea dentata            |                                                                                                                                                      |
| NCU00153159 | Castanea dentata            |                                                                                                                                                      |
| NCU00153185 | Castanea pumila var. pumila |                                                                                                                                                      |
| NCU00153184 | Castanea pumila var. pumila |                                                                                                                                                      |



|             |                             |
|-------------|-----------------------------|
| NCU00153179 | Castanea pumila var. pumila |
| NCU00153181 | Castanea pumila var. pumila |
| NCU00153183 | Castanea pumila var. pumila |
| NCU00008711 | Castanea pumila var. pumila |
| NCU00153121 | Castanea dentata            |
| NCU00008703 | Castanea dentata            |
| NCU00153122 | Castanea dentata            |
| NCU00153047 | Castanea crenata            |
| NCU00008705 | Castanea dentata            |
| NCU00153051 | Castanea dentata            |
| NCU00153052 | Castanea dentata            |
| NCU00153054 | Castanea dentata            |
| NCU00153053 | Castanea dentata            |
| NCU00153056 | Castanea dentata            |
| NCU00153055 | Castanea dentata            |
| NCU00153336 | Castanea pumila var. pumila |
| NCU00153337 | Castanea pumila var. pumila |
| NCU00153339 | Castanea pumila var. pumila |
| NCU00153338 | Castanea pumila var. pumila |
| NCU00153340 | Castanea pumila var. pumila |
| NCU00014050 | Castanea pumila var. pumila |
| NCU00153341 | Castanea pumila var. pumila |
| NCU00153342 | Castanea pumila var. pumila |
| NCU00153344 | Castanea pumila var. pumila |
| NCU00153345 | Castanea pumila var. pumila |
| NCU00153346 | Castanea pumila var. pumila |
| NCU00153348 | Castanea pumila var. pumila |
| NCU00153335 | Castanea pumila var. pumila |
| NCU00153334 | Castanea pumila var. pumila |
| NCU00153333 | Castanea pumila var. pumila |
| NCU00153332 | Castanea pumila var. pumila |
| NCU00153331 | Castanea pumila var. pumila |
| NCU00115121 | Castanea pumila var. pumila |
| NCU00153329 | Castanea pumila var. pumila |
| NCU00153178 | Castanea pumila var. pumila |
| NCU00153304 | Castanea pumila var. pumila |
| NCU00153294 | Castanea pumila var. pumila |
| NCU00153295 | Castanea pumila var. pumila |
| NCU00153297 | Castanea pumila var. pumila |
| NCU00028020 | Castanea pumila var. pumila |
| NCU00153298 | Castanea pumila var. pumila |
| NCU00008709 | Castanea pumila var. pumila |
| NCU00153299 | Castanea pumila var. pumila |
| NCU00153300 | Castanea pumila var. pumila |
| NCU00153293 | Castanea pumila var. pumila |

|             |                             |                                                                                                                                 |
|-------------|-----------------------------|---------------------------------------------------------------------------------------------------------------------------------|
| NCU00153320 | Castanea pumila var. pumila |                                                                                                                                 |
| NCU00153305 | Castanea pumila var. pumila |                                                                                                                                 |
| NCU00153306 | Castanea pumila var. pumila |                                                                                                                                 |
| NCU00153307 | Castanea pumila var. pumila |                                                                                                                                 |
| NCU00153310 | Castanea pumila var. pumila |                                                                                                                                 |
| NCU00153309 | Castanea pumila var. pumila |                                                                                                                                 |
| NCU00153312 | Castanea pumila var. pumila |                                                                                                                                 |
| NCU00153313 | See note                    | Specimens from two different species are glued to this sheet. A = <i>C. dentata</i> ; B = <i>C. pumila</i> var. <i>pumila</i> . |
| NCU00153313 | See note                    | Specimens from two different species are glued to this sheet. A = <i>C. dentata</i> ; B = <i>C. pumila</i> var. <i>pumila</i> . |
| NCU00153314 | Castanea pumila var. pumila |                                                                                                                                 |
| NCU00153315 | Castanea pumila var. pumila |                                                                                                                                 |
| NCU00153317 | Castanea pumila var. pumila |                                                                                                                                 |
| NCU00153319 | Castanea pumila var. pumila |                                                                                                                                 |
| NCU00153318 | Castanea pumila var. pumila |                                                                                                                                 |
| NCU00153350 | Castanea mollissima         |                                                                                                                                 |
| NCU00110700 | Castanea pumila var. pumila |                                                                                                                                 |
| NCU00153349 | Castanea pumila var. pumila |                                                                                                                                 |
| NCU00153402 | Castanea pumila var. pumila |                                                                                                                                 |
| NCU00153404 | Castanea pumila var. pumila |                                                                                                                                 |
| NCU00153407 | Castanea pumila var. pumila |                                                                                                                                 |
| NCU00153418 | Castanea pumila var. pumila |                                                                                                                                 |
| NCU00153416 | Castanea pumila var. pumila |                                                                                                                                 |
| NCU00153413 | Castanea pumila var. pumila |                                                                                                                                 |
| NCU00153412 | Castanea pumila var. pumila |                                                                                                                                 |
| NCU00153411 | Castanea pumila var. pumila |                                                                                                                                 |
| NCU00153410 | Castanea pumila var. pumila |                                                                                                                                 |
| NCU00153409 | Castanea pumila var. pumila |                                                                                                                                 |
| NCU00153408 | Castanea pumila var. pumila |                                                                                                                                 |
| NCU00153419 | Castanea pumila var. pumila |                                                                                                                                 |
| NCU00153368 | Castanea pumila var. pumila |                                                                                                                                 |
| NCU00153374 | Castanea pumila var. pumila |                                                                                                                                 |
| NCU00153375 | Castanea pumila var. pumila |                                                                                                                                 |
| NCU00153386 | Castanea pumila var. pumila |                                                                                                                                 |
| NCU00153385 | Castanea pumila var. pumila |                                                                                                                                 |
| NCU00153382 | Castanea pumila var. pumila |                                                                                                                                 |
| NCU00153381 | Castanea pumila var. pumila |                                                                                                                                 |
| NCU00153913 | Castanea dentata            |                                                                                                                                 |
| NCU00153817 | Castanea pumila var. pumila |                                                                                                                                 |
| NCU00153816 | Castanea pumila var. pumila |                                                                                                                                 |

|             |                                           |
|-------------|-------------------------------------------|
| NCU00153815 | <i>Castanea pumila</i> var. <i>pumila</i> |
| NCU00153824 | <i>Castanea pumila</i> var. <i>pumila</i> |
| NCU00153826 | <i>Castanea mollissima</i>                |
| NCU00153825 | <i>Castanea mollissima</i>                |
| NCU00153840 | <i>Castanea dentata</i>                   |
| NCU00153839 | <i>Castanea dentata</i>                   |
| NCU00154913 | <i>Castanea pumila</i> var. <i>pumila</i> |
| NCU00154906 | <i>Castanea pumila</i> var. <i>pumila</i> |
| NCU00154907 | <i>Castanea pumila</i> var. <i>pumila</i> |
| NCU00154908 | <i>Castanea pumila</i> var. <i>pumila</i> |
| NCU00154909 | <i>Castanea pumila</i> var. <i>pumila</i> |
| NCU00154911 | <i>Castanea pumila</i> var. <i>pumila</i> |
| NCU00154912 | <i>Castanea pumila</i> var. <i>pumila</i> |
| NCU00154905 | <i>Castanea pumila</i> var. <i>pumila</i> |
| NCU00086049 | <i>Castanea pumila</i> var. <i>pumila</i> |
| NCU00135544 | <i>Castanea pumila</i> var. <i>pumila</i> |
| NCU00154896 | <i>Castanea pumila</i> var. <i>pumila</i> |
| NCU00154897 | <i>Castanea pumila</i> var. <i>pumila</i> |
| NCU00154898 | <i>Castanea pumila</i> var. <i>pumila</i> |
| NCU00154899 | <i>Castanea pumila</i> var. <i>pumila</i> |
| NCU00154901 | <i>Castanea pumila</i> var. <i>pumila</i> |
| NCU00154902 | <i>Castanea pumila</i> var. <i>pumila</i> |
| NCU00154903 | <i>Castanea pumila</i> var. <i>pumila</i> |
| NCU00154904 | <i>Castanea pumila</i> var. <i>pumila</i> |
| NCU00154894 | <i>Castanea pumila</i> var. <i>pumila</i> |
| NCU00154876 | <i>Castanea dentata</i>                   |
| NCU00154887 | <i>Castanea pumila</i> var. <i>pumila</i> |
| NCU00154888 | <i>Castanea pumila</i> var. <i>pumila</i> |
| NCU00154890 | <i>Castanea pumila</i> var. <i>pumila</i> |
| NCU00154892 | <i>Castanea pumila</i> var. <i>pumila</i> |
| NCU00154875 | <i>Castanea pumila</i> var. <i>pumila</i> |
| NCU00154893 | <i>Castanea pumila</i> var. <i>pumila</i> |
| NCU00154863 | <i>Castanea pumila</i> var. <i>pumila</i> |
| NCU00154864 | <i>Castanea pumila</i> var. <i>pumila</i> |
| NCU00154865 | <i>Castanea pumila</i> var. <i>pumila</i> |
| NCU00154866 | <i>Castanea pumila</i> var. <i>pumila</i> |
| NCU00154867 | <i>Castanea pumila</i> var. <i>pumila</i> |
| NCU00154868 | <i>Castanea pumila</i> var. <i>pumila</i> |
| NCU00154869 | <i>Castanea pumila</i> var. <i>pumila</i> |
| NCU00154873 | <i>Castanea pumila</i> var. <i>pumila</i> |
| NCU00154871 | <i>Castanea pumila</i> var. <i>pumila</i> |
| NCU00154874 | <i>Castanea pumila</i> var. <i>pumila</i> |
| NCU00153916 | <i>Castanea dentata</i>                   |
| NCU00153914 | <i>Castanea dentata</i>                   |
| NCU00153925 | <i>Castanea dentata</i>                   |

|             |                            |                                                                                                                                                                        |
|-------------|----------------------------|------------------------------------------------------------------------------------------------------------------------------------------------------------------------|
| NCU00085296 | <i>Castanea dentata</i>    | Note absence of stellate trichomes on abaxial leaf surfaces. Note presence of long, appressed, simple trichomes on midribs. Note absence of trichomes on leaf margins. |
| NCU00085297 | <i>Castanea dentata</i>    |                                                                                                                                                                        |
| NCU00085295 | <i>Castanea dentata</i>    |                                                                                                                                                                        |
| NCU00085294 | <i>Castanea dentata</i>    |                                                                                                                                                                        |
| NCU00085293 | <i>Castanea dentata</i>    |                                                                                                                                                                        |
| NCU00085292 | <i>Castanea dentata</i>    |                                                                                                                                                                        |
| NCU00085291 | <i>Castanea dentata</i>    |                                                                                                                                                                        |
| NCU00085298 | <i>Castanea dentata</i>    |                                                                                                                                                                        |
| NCU00153933 | <i>Castanea dentata</i>    |                                                                                                                                                                        |
| NCU00153932 | <i>Castanea dentata</i>    |                                                                                                                                                                        |
| NCU00153931 | <i>Castanea dentata</i>    |                                                                                                                                                                        |
| NCU00153930 | <i>Castanea mollissima</i> | See abundant stellate trichomes and tan twig color. There are also larger, fewer lenticels than would be seen in <i>C. dentata</i> .                                   |
| NCU00153927 | <i>Castanea dentata</i>    |                                                                                                                                                                        |
| NCU00153926 | <i>Castanea dentata</i>    |                                                                                                                                                                        |
| NCU00153888 | <i>Castanea dentata</i>    |                                                                                                                                                                        |
| NCU00153887 | <i>Castanea dentata</i>    |                                                                                                                                                                        |
| NCU00153885 | <i>Castanea dentata</i>    |                                                                                                                                                                        |
| NCU00153886 | <i>Castanea dentata</i>    |                                                                                                                                                                        |
| NCU00153883 | <i>Castanea dentata</i>    |                                                                                                                                                                        |
| NCU00153884 | <i>Castanea dentata</i>    |                                                                                                                                                                        |
| NCU00153882 | <i>Castanea dentata</i>    |                                                                                                                                                                        |
| NCU00153889 | <i>Castanea dentata</i>    |                                                                                                                                                                        |
| NCU00153945 | <i>Castanea mollissima</i> |                                                                                                                                                                        |
| NCU00153944 | <i>Castanea mollissima</i> |                                                                                                                                                                        |
| NCU00153943 | <i>Castanea mollissima</i> |                                                                                                                                                                        |
| NCU00153942 | <i>Castanea mollissima</i> |                                                                                                                                                                        |
| NCU00153941 | <i>Castanea mollissima</i> |                                                                                                                                                                        |
| NCU00008706 | <i>Castanea mollissima</i> |                                                                                                                                                                        |
| NCU00153832 | <i>Castanea dentata</i>    |                                                                                                                                                                        |
| NCU00153833 | <i>Castanea dentata</i>    |                                                                                                                                                                        |
| NCU00153834 | <i>Castanea dentata</i>    |                                                                                                                                                                        |
| NCU00153835 | <i>Castanea dentata</i>    |                                                                                                                                                                        |
| NCU00153938 | <i>Castanea mollissima</i> |                                                                                                                                                                        |
| NCU00153830 | <i>Castanea dentata</i>    |                                                                                                                                                                        |
| NCU00153829 | <i>Castanea dentata</i>    |                                                                                                                                                                        |
| NCU00153841 | <i>Castanea dentata</i>    |                                                                                                                                                                        |
| NCU00153855 | <i>Castanea dentata</i>    |                                                                                                                                                                        |
| NCU00153854 | <i>Castanea dentata</i>    |                                                                                                                                                                        |

|             |                                               |                                                                                                                                                                                                                                                  |
|-------------|-----------------------------------------------|--------------------------------------------------------------------------------------------------------------------------------------------------------------------------------------------------------------------------------------------------|
| NCU00153853 | <i>Castanea dentata</i>                       |                                                                                                                                                                                                                                                  |
| NCU00153852 | <i>Castanea dentata</i>                       |                                                                                                                                                                                                                                                  |
| NCU00153851 | <i>Castanea mollissima</i>                    | Note the dense covering of stellate trichomes on abaxial leaf surface; short, erect, simple trichomes on adaxial midrib; stellate trichomes on adaxial leaf surface adjacent to midrib; and stipules broader than stem with a flare at the base. |
| NCU00153850 | <i>Castanea dentata</i>                       |                                                                                                                                                                                                                                                  |
| NCU00153848 | <i>Castanea dentata</i>                       |                                                                                                                                                                                                                                                  |
| NCU00153846 | <i>Castanea dentata</i>                       |                                                                                                                                                                                                                                                  |
| NCU00153844 | <i>Castanea dentata</i>                       |                                                                                                                                                                                                                                                  |
| NCU00153842 | <i>Castanea dentata</i>                       |                                                                                                                                                                                                                                                  |
| NCU00153843 | <i>Castanea dentata</i>                       |                                                                                                                                                                                                                                                  |
| NCU00153819 | <i>Castanea pumila</i> var. <i>pumila</i>     |                                                                                                                                                                                                                                                  |
| NCU00153818 | <i>Castanea pumila</i> var. <i>pumila</i>     |                                                                                                                                                                                                                                                  |
| NCU00153924 | <i>Castanea dentata</i>                       |                                                                                                                                                                                                                                                  |
| NCU00153923 | <i>Castanea dentata</i>                       |                                                                                                                                                                                                                                                  |
| NCU00153920 | <i>Castanea dentata</i>                       |                                                                                                                                                                                                                                                  |
| NCU00153922 | <i>Castanea dentata</i>                       |                                                                                                                                                                                                                                                  |
| NCU00053292 | <i>Castanea pumila</i> var. <i>pumila</i>     | Twigs on this specimen are more slender than twigs we have observed in <i>C. pumila</i> var. <i>ozarkensis</i> .                                                                                                                                 |
| NCU00153918 | <i>Castanea dentata</i>                       |                                                                                                                                                                                                                                                  |
| NCU00053293 | <i>Castanea pumila</i> var. <i>ozarkensis</i> |                                                                                                                                                                                                                                                  |
| NCU00153917 | <i>Castanea dentata</i>                       |                                                                                                                                                                                                                                                  |
| NCU00053294 | <i>Castanea pumila</i>                        | Leaves smaller than we have observed in <i>C. pumila</i> var. <i>ozarkensis</i> . Current season's twigs appear slender. Pistillate flowers absent, however.                                                                                     |
| NCU00053295 | <i>Castanea pumila</i>                        |                                                                                                                                                                                                                                                  |
| NCU00053297 | <i>Castanea pumila</i>                        |                                                                                                                                                                                                                                                  |
| NCU00053298 | <i>Castanea pumila</i>                        |                                                                                                                                                                                                                                                  |
| NCU00053299 | <i>Castanea pumila</i>                        |                                                                                                                                                                                                                                                  |
| NCU00053401 | <i>Castanea pumila</i>                        |                                                                                                                                                                                                                                                  |
| NCU00053402 | <i>Castanea pumila</i>                        |                                                                                                                                                                                                                                                  |
| NCU00053291 | <i>Castanea pumila</i>                        |                                                                                                                                                                                                                                                  |
| NCU00153951 | <i>Castanea pumila</i> var. <i>pumila</i>     |                                                                                                                                                                                                                                                  |
| NCU00153950 | <i>Castanea pumila</i> var. <i>pumila</i>     |                                                                                                                                                                                                                                                  |
| NCU00153948 | <i>Castanea pumila</i> var. <i>pumila</i>     |                                                                                                                                                                                                                                                  |
| NCU00153952 | <i>Castanea pumila</i> var. <i>pumila</i>     |                                                                                                                                                                                                                                                  |
| NCU00153965 | <i>Castanea pumila</i> var. <i>pumila</i>     |                                                                                                                                                                                                                                                  |
| NCU00153963 | <i>Castanea pumila</i> var. <i>pumila</i>     |                                                                                                                                                                                                                                                  |

|             |                                           |                                                                                                                                                                                                                                                                    |
|-------------|-------------------------------------------|--------------------------------------------------------------------------------------------------------------------------------------------------------------------------------------------------------------------------------------------------------------------|
| NCU00153962 | <i>Castanea pumila</i> var. <i>pumila</i> |                                                                                                                                                                                                                                                                    |
| NCU00153961 | <i>Castanea pumila</i> var. <i>pumila</i> |                                                                                                                                                                                                                                                                    |
| NCU00153960 | <i>Castanea pumila</i> var. <i>pumila</i> |                                                                                                                                                                                                                                                                    |
| NCU00153959 | <i>Castanea pumila</i> var. <i>pumila</i> | This specimen is similar to <i>C. alabamensis</i> in its absence of stellate trichomes and presence of ciliate leaf margins, but is different by having simple trichomes on the twigs.                                                                             |
| NCU00153958 | <i>Castanea pumila</i> var. <i>pumila</i> |                                                                                                                                                                                                                                                                    |
| NCU00153957 | <i>Castanea pumila</i> var. <i>pumila</i> |                                                                                                                                                                                                                                                                    |
| NCU00153955 | <i>Castanea pumila</i> var. <i>pumila</i> |                                                                                                                                                                                                                                                                    |
| NCU00153954 | <i>Castanea pumila</i> var. <i>pumila</i> |                                                                                                                                                                                                                                                                    |
| NCU00153966 | <i>Castanea pumila</i> var. <i>pumila</i> |                                                                                                                                                                                                                                                                    |
| NCU00153953 | <i>Castanea pumila</i> var. <i>pumila</i> |                                                                                                                                                                                                                                                                    |
| NCU00153975 | <i>Castanea pumila</i> var. <i>pumila</i> |                                                                                                                                                                                                                                                                    |
| NCU00153974 | <i>Castanea pumila</i> var. <i>pumila</i> | This specimen is similar to <i>C. alabamensis</i> in its absence of stellate trichomes and presence of ciliate leaf margins, but is different by having simple trichomes on the twigs. Leaf shape suggests that voucher may have been collected from shade leaves. |
| NCU00153973 | <i>Castanea pumila</i> var. <i>pumila</i> |                                                                                                                                                                                                                                                                    |
| NCU00153972 | <i>Castanea pumila</i> var. <i>pumila</i> | This sheet may contain parts of two separate plants. See leaf color.                                                                                                                                                                                               |
| NCU00153971 | <i>Castanea pumila</i> var. <i>pumila</i> |                                                                                                                                                                                                                                                                    |
| NCU00153969 | <i>Castanea pumila</i> var. <i>pumila</i> |                                                                                                                                                                                                                                                                    |
| NCU00153968 | <i>Castanea pumila</i> var. <i>pumila</i> |                                                                                                                                                                                                                                                                    |
| NCU00153352 | <i>Castanea mollissima</i>                |                                                                                                                                                                                                                                                                    |
| NCU00153351 | <i>Castanea henryi</i>                    |                                                                                                                                                                                                                                                                    |
| NCU00153355 | <i>Castanea seguinii</i>                  |                                                                                                                                                                                                                                                                    |
| NCU00153354 | <i>Castanea seguinii</i>                  |                                                                                                                                                                                                                                                                    |
| NCU00153353 | <i>Castanea mollissima</i>                |                                                                                                                                                                                                                                                                    |
| NCU00013728 | <i>Castanea mollissima</i>                |                                                                                                                                                                                                                                                                    |
| NCU00153366 | <i>Castanea dentata</i>                   |                                                                                                                                                                                                                                                                    |
| NCU00153364 | <i>Castanea dentata</i>                   |                                                                                                                                                                                                                                                                    |
| NCU00153363 | <i>Castanea dentata</i>                   |                                                                                                                                                                                                                                                                    |
| NCU00153362 | <i>Castanea dentata</i>                   |                                                                                                                                                                                                                                                                    |
| NCU00153361 | <i>Castanea dentata</i>                   |                                                                                                                                                                                                                                                                    |
| NCU00153360 | <i>Castanea dentata</i>                   |                                                                                                                                                                                                                                                                    |
| NCU00153358 | <i>Castanea dentata</i>                   |                                                                                                                                                                                                                                                                    |
| NCU00153356 | <i>Castanea dentata</i>                   |                                                                                                                                                                                                                                                                    |
| NCU00153367 | <i>Castanea dentata</i>                   |                                                                                                                                                                                                                                                                    |
| NCU00153373 | <i>Castanea pumila</i> var. <i>pumila</i> |                                                                                                                                                                                                                                                                    |

|             |                             |                                                                                                                                                                                                                                                                                        |
|-------------|-----------------------------|----------------------------------------------------------------------------------------------------------------------------------------------------------------------------------------------------------------------------------------------------------------------------------------|
| NCU00153371 | Castanea pumila var. pumila |                                                                                                                                                                                                                                                                                        |
| NCU00153370 | Castanea pumila var. pumila |                                                                                                                                                                                                                                                                                        |
| NCU00153369 | Castanea pumila var. pumila |                                                                                                                                                                                                                                                                                        |
| NCU00157730 | Castanea mollissima         |                                                                                                                                                                                                                                                                                        |
| NCU00154862 | Castanea pumila var. pumila |                                                                                                                                                                                                                                                                                        |
| NCU00154014 | Castanea pumila var. pumila |                                                                                                                                                                                                                                                                                        |
| NCU00154015 | Castanea pumila var. pumila |                                                                                                                                                                                                                                                                                        |
| NCU00154013 | Castanea pumila var. pumila |                                                                                                                                                                                                                                                                                        |
| NCU00154016 | Castanea pumila var. pumila |                                                                                                                                                                                                                                                                                        |
| NCU00154016 | Castanea pumila var. pumila |                                                                                                                                                                                                                                                                                        |
| NCU00154017 | Castanea pumila var. pumila |                                                                                                                                                                                                                                                                                        |
| NCU00154019 | Castanea pumila var. pumila |                                                                                                                                                                                                                                                                                        |
| NCU00154020 | Castanea pumila var. pumila |                                                                                                                                                                                                                                                                                        |
| NCU00154861 | Castanea pumila var. pumila |                                                                                                                                                                                                                                                                                        |
| NCU00154011 | Castanea pumila var. pumila |                                                                                                                                                                                                                                                                                        |
| NCU00154001 | Castanea pumila var. pumila |                                                                                                                                                                                                                                                                                        |
| NCU00154002 | Castanea pumila var. pumila |                                                                                                                                                                                                                                                                                        |
| NCU00154004 | Castanea pumila var. pumila |                                                                                                                                                                                                                                                                                        |
| NCU00154005 | Castanea pumila var. pumila |                                                                                                                                                                                                                                                                                        |
| NCU00154006 | Castanea pumila var. pumila |                                                                                                                                                                                                                                                                                        |
| NCU00154008 | Castanea pumila var. pumila |                                                                                                                                                                                                                                                                                        |
| NCU00154008 | Castanea pumila var. pumila |                                                                                                                                                                                                                                                                                        |
| NCU00154009 | Castanea pumila var. pumila |                                                                                                                                                                                                                                                                                        |
| NCU00154010 | Castanea pumila var. pumila |                                                                                                                                                                                                                                                                                        |
| NCU00154000 | Castanea pumila var. pumila |                                                                                                                                                                                                                                                                                        |
| NCU00153991 | Castanea pumila var. pumila |                                                                                                                                                                                                                                                                                        |
| NCU00153993 | Castanea pumila var. pumila |                                                                                                                                                                                                                                                                                        |
| NCU00153995 | Castanea pumila var. pumila |                                                                                                                                                                                                                                                                                        |
| NCU00153996 | Castanea pumila var. pumila |                                                                                                                                                                                                                                                                                        |
| NCU00153997 | Castanea pumila var. pumila |                                                                                                                                                                                                                                                                                        |
| NCU00153999 | Castanea pumila var. pumila |                                                                                                                                                                                                                                                                                        |
| NCU00153990 | Castanea pumila var. pumila |                                                                                                                                                                                                                                                                                        |
| NCU00153986 | Castanea pumila var. pumila |                                                                                                                                                                                                                                                                                        |
| NCU00153987 | Castanea pumila var. pumila |                                                                                                                                                                                                                                                                                        |
| NCU00153989 | Castanea alabamensis        | We observed only one stellate trichome in the axil of midrib and lateral vein on abaxial surface of leaf. Plant was sampled from Sumter Co., AL, a potential contact zone for different chinquapin varieties and may be a hybrid of <i>C. alabamensis</i> and <i>C. p. var. pumila</i> |
| NCU00153985 | Castanea pumila var. pumila |                                                                                                                                                                                                                                                                                        |
| NCU00153977 | Castanea pumila var. pumila |                                                                                                                                                                                                                                                                                        |
| NCU00153978 | Castanea pumila var. pumila |                                                                                                                                                                                                                                                                                        |

|             |                                 |                                                                                                                                                                    |
|-------------|---------------------------------|--------------------------------------------------------------------------------------------------------------------------------------------------------------------|
| NCU00153980 | Castanea pumila var. pumila     |                                                                                                                                                                    |
| NCU00153979 | Castanea pumila var. pumila     |                                                                                                                                                                    |
| NCU00153982 | Castanea pumila var. pumila     |                                                                                                                                                                    |
| NCU00153984 | Castanea pumila var. pumila     |                                                                                                                                                                    |
| NCU00053435 | Castanea pumila var. ozarkensis |                                                                                                                                                                    |
| NCU00053446 | Castanea pumila var. ozarkensis |                                                                                                                                                                    |
| NCU00031434 | Castanea pumila var. ozarkensis |                                                                                                                                                                    |
| NCU00053444 | Castanea pumila                 |                                                                                                                                                                    |
| NCU00053441 | Castanea pumila var. ozarkensis |                                                                                                                                                                    |
| NCU00053442 | Castanea pumila var. ozarkensis |                                                                                                                                                                    |
| NCU00053439 | Castanea pumila var. ozarkensis |                                                                                                                                                                    |
| NCU00053440 | Castanea pumila var. ozarkensis |                                                                                                                                                                    |
| NCU00053447 | Castanea pumila var. ozarkensis |                                                                                                                                                                    |
| NCU00053452 | Castanea pumila var. ozarkensis |                                                                                                                                                                    |
| NCU00053451 | Castanea pumila                 |                                                                                                                                                                    |
| NCU00053450 | Castanea pumila var. ozarkensis |                                                                                                                                                                    |
| NCU00053449 | Castanea pumila var. ozarkensis |                                                                                                                                                                    |
| NCU00053453 | Castanea pumila var. ozarkensis |                                                                                                                                                                    |
| NCU00053460 | Castanea pumila var. ozarkensis |                                                                                                                                                                    |
| NCU00053459 | Castanea pumila var. ozarkensis |                                                                                                                                                                    |
| NCU00053457 | Castanea pumila var. ozarkensis |                                                                                                                                                                    |
| NCU00053418 | Castanea pumila var. ozarkensis |                                                                                                                                                                    |
| NCU00053456 | Castanea pumila var. ozarkensis |                                                                                                                                                                    |
| NCU00053461 | Castanea pumila var. ozarkensis |                                                                                                                                                                    |
| NCU00053463 | Castanea pumila var. ozarkensis |                                                                                                                                                                    |
| NCU00053462 | Castanea pumila var. ozarkensis |                                                                                                                                                                    |
| NCU00053436 | Castanea pumila var. pumila     | Note the small bur (less than 2.5 cm diameter, including spines) and short leaf lengths (10 cm or less).                                                           |
| NCU00053437 | Castanea pumila                 | Mature bur diameter (2 cm), leaf lengths (11.5 cm in length, max.), and note on plant habit all suggest that plant could be either var. pumila or var. ozarkensis. |
| NCU00153150 | Castanea dentata                |                                                                                                                                                                    |
| NCU00153148 | Castanea dentata                |                                                                                                                                                                    |
| NCU00153169 | Castanea dentata                |                                                                                                                                                                    |
| NCU00153166 | Castanea dentata                |                                                                                                                                                                    |
| NCU00153165 | Castanea dentata                |                                                                                                                                                                    |
| NCU00008701 | Castanea dentata                |                                                                                                                                                                    |
| NCU00153164 | Castanea dentata                |                                                                                                                                                                    |
| NCU00153162 | Castanea dentata                |                                                                                                                                                                    |
| NCU00153161 | Castanea dentata                |                                                                                                                                                                    |
| NCU00153170 | Castanea dentata                |                                                                                                                                                                    |
| NCU00008702 | Castanea dentata                |                                                                                                                                                                    |



|             |                                           |                                                                                                                 |
|-------------|-------------------------------------------|-----------------------------------------------------------------------------------------------------------------|
| NCU00153177 | <i>Castanea pumila</i> var. <i>pumila</i> |                                                                                                                 |
| NCU00031381 | <i>Castanea pumila</i> var. <i>pumila</i> |                                                                                                                 |
| NCU00153059 | <i>Castanea crenata</i>                   | Note the cordate leaf bases, mix of stellate and simple abaxial trichomes, slender twig, and oblong leaf shape. |
| NCU00116435 | <i>Castanea dentata</i>                   |                                                                                                                 |
| NCU00153147 | <i>Castanea dentata</i>                   |                                                                                                                 |
| NCU00153146 | <i>Castanea dentata</i>                   |                                                                                                                 |
| NCU00153145 | <i>Castanea dentata</i>                   |                                                                                                                 |
| NCU00113377 | <i>Castanea mollissima</i>                | Note cordate leaf bases, stipules wider than stem, crenate leaf margins.                                        |
| NCU00154955 | <i>Castanea pumila</i> var. <i>pumila</i> |                                                                                                                 |
| NCU00154953 | <i>Castanea pumila</i> var. <i>pumila</i> |                                                                                                                 |
| NCU00154952 | <i>Castanea pumila</i> var. <i>pumila</i> |                                                                                                                 |
| NCU00154949 | <i>Castanea pumila</i> var. <i>pumila</i> |                                                                                                                 |
| NCU00154950 | <i>Castanea pumila</i> var. <i>pumila</i> |                                                                                                                 |
| NCU00154947 | <i>Castanea pumila</i> var. <i>pumila</i> |                                                                                                                 |
| NCU00154956 | <i>Castanea pumila</i> var. <i>pumila</i> |                                                                                                                 |
| NCU00154966 | <i>Castanea pumila</i> var. <i>pumila</i> |                                                                                                                 |
| NCU00154964 | <i>Castanea pumila</i> var. <i>pumila</i> |                                                                                                                 |
| NCU00154962 | <i>Castanea pumila</i> var. <i>pumila</i> |                                                                                                                 |
| NCU00154961 | <i>Castanea pumila</i> var. <i>pumila</i> |                                                                                                                 |
| NCU00154960 | <i>Castanea pumila</i> var. <i>pumila</i> |                                                                                                                 |
| NCU00154959 | <i>Castanea pumila</i> var. <i>pumila</i> |                                                                                                                 |
| NCU00154957 | <i>Castanea pumila</i> var. <i>pumila</i> |                                                                                                                 |
| NCU00154967 | <i>Castanea pumila</i> var. <i>pumila</i> |                                                                                                                 |
| NCU00154973 | <i>Castanea pumila</i> var. <i>pumila</i> |                                                                                                                 |
| NCU00154972 | <i>Castanea pumila</i> var. <i>pumila</i> |                                                                                                                 |
| NCU00154971 | <i>Castanea pumila</i> var. <i>pumila</i> |                                                                                                                 |
| NCU00154970 | <i>Castanea pumila</i> var. <i>pumila</i> |                                                                                                                 |
| NCU00154969 | <i>Castanea pumila</i> var. <i>pumila</i> |                                                                                                                 |
| NCU00154968 | <i>Castanea pumila</i> var. <i>pumila</i> |                                                                                                                 |
| NCU00154974 | <i>Castanea pumila</i> var. <i>pumila</i> |                                                                                                                 |
| NCU00155307 | <i>Castanea pumila</i> var. <i>pumila</i> |                                                                                                                 |
| NCU00155306 | <i>Castanea pumila</i> var. <i>pumila</i> |                                                                                                                 |
| NCU00155299 | <i>Castanea pumila</i> var. <i>pumila</i> |                                                                                                                 |
| NCU00155298 | <i>Castanea pumila</i> var. <i>pumila</i> |                                                                                                                 |
| NCU00155300 | <i>Castanea pumila</i> var. <i>pumila</i> |                                                                                                                 |
| NCU00155301 | <i>Castanea pumila</i> var. <i>pumila</i> |                                                                                                                 |
| NCU00155302 | <i>Castanea pumila</i> var. <i>pumila</i> |                                                                                                                 |
| NCU00155217 | <i>Castanea pumila</i> var. <i>pumila</i> |                                                                                                                 |
| NCU00155218 | <i>Castanea pumila</i> var. <i>pumila</i> |                                                                                                                 |
| NCU00155213 | <i>Castanea pumila</i> var. <i>pumila</i> |                                                                                                                 |

|             |                                               |
|-------------|-----------------------------------------------|
| NCU00155214 | <i>Castanea pumila</i> var. <i>pumila</i>     |
| NCU00155215 | <i>Castanea pumila</i> var. <i>pumila</i>     |
| NCU00155219 | <i>Castanea pumila</i> var. <i>pumila</i>     |
| NCU00155209 | <i>Castanea pumila</i> var. <i>pumila</i>     |
| NCU00155211 | <i>Castanea pumila</i> var. <i>pumila</i>     |
| NCU00155210 | <i>Castanea pumila</i> var. <i>pumila</i>     |
| NCU00155288 | <i>Castanea pumila</i> var. <i>pumila</i>     |
| NCU00155285 | <i>Castanea pumila</i> var. <i>pumila</i>     |
| NCU00155357 | <i>Castanea dentata</i>                       |
| NCU00155283 | <i>Castanea pumila</i> var. <i>pumila</i>     |
| NCU00155355 | <i>Castanea dentata</i>                       |
| NCU00155354 | <i>Castanea dentata</i>                       |
| NCU00155349 | <i>Castanea pumila</i> var. <i>ozarkensis</i> |
| NCU00155348 | <i>Castanea pumila</i> var. <i>ozarkensis</i> |
| NCU00155352 | <i>Castanea pumila</i> var. <i>ozarkensis</i> |
| NCU00155346 | <i>Castanea dentata</i>                       |
| NCU00155104 | <i>Castanea pumila</i> var. <i>pumila</i>     |
| NCU00155103 | <i>Castanea pumila</i> var. <i>pumila</i>     |
| NCU00155102 | <i>Castanea pumila</i> var. <i>pumila</i>     |
| NCU00155101 | <i>Castanea pumila</i> var. <i>pumila</i>     |
| NCU00154979 | <i>Castanea pumila</i> var. <i>pumila</i>     |
| NCU00154980 | <i>Castanea pumila</i> var. <i>pumila</i>     |
| NCU00154977 | <i>Castanea pumila</i> var. <i>pumila</i>     |
| NCU00154976 | <i>Castanea pumila</i> var. <i>pumila</i>     |
| NCU00155105 | <i>Castanea pumila</i> var. <i>pumila</i>     |
| NCU00154975 | <i>Castanea pumila</i> var. <i>pumila</i>     |
| NCU00155114 | <i>Castanea pumila</i> var. <i>pumila</i>     |
| NCU00155113 | <i>Castanea pumila</i> var. <i>pumila</i>     |
| NCU00155112 | <i>Castanea pumila</i> var. <i>pumila</i>     |
| NCU00155111 | <i>Castanea pumila</i> var. <i>pumila</i>     |
| NCU00155109 | <i>Castanea pumila</i> var. <i>pumila</i>     |
| NCU00155108 | <i>Castanea pumila</i> var. <i>pumila</i>     |
| NCU00155107 | <i>Castanea pumila</i> var. <i>pumila</i>     |
| NCU00155106 | <i>Castanea pumila</i> var. <i>pumila</i>     |
| NCU00155115 | <i>Castanea pumila</i> var. <i>pumila</i>     |
| NCU00155120 | <i>Castanea pumila</i> var. <i>pumila</i>     |
| NCU00155119 | <i>Castanea pumila</i> var. <i>pumila</i>     |
| NCU00155118 | <i>Castanea pumila</i> var. <i>pumila</i>     |
| NCU00155117 | <i>Castanea pumila</i> var. <i>pumila</i>     |
| NCU00155116 | <i>Castanea pumila</i> var. <i>pumila</i>     |
| NCU00157719 | <i>Castanea pumila</i> var. <i>pumila</i>     |
| NCU00157720 | <i>Castanea pumila</i> var. <i>pumila</i>     |
| NCU00157721 | <i>Castanea pumila</i> var. <i>pumila</i>     |
| NCU00157723 | <i>Castanea pumila</i> var. <i>pumila</i>     |
| NCU00157724 | <i>Castanea pumila</i> var. <i>pumila</i>     |

|             |                             |
|-------------|-----------------------------|
| NCU00157725 | Castanea pumila var. pumila |
| NCU00157726 | Castanea pumila var. pumila |
| NCU00155289 | Castanea pumila var. pumila |
| NCU00155297 | Castanea pumila var. pumila |
| NCU00155296 | Castanea pumila var. pumila |
| NCU00155295 | Castanea pumila var. pumila |
| NCU00155294 | Castanea pumila var. pumila |
| NCU00155293 | Castanea pumila var. pumila |
| NCU00155292 | Castanea pumila var. pumila |
| NCU00155291 | Castanea pumila var. pumila |
| NCU00155220 | Castanea pumila var. pumila |
| NCU00155281 | Castanea pumila var. pumila |
| NCU00155284 | Castanea pumila var. pumila |
| NCU00155318 | Castanea pumila var. pumila |
| NCU00155317 | Castanea pumila var. pumila |
| NCU00155316 | Castanea pumila var. pumila |
| NCU00092135 | Castanea pumila var. pumila |
| NCU00155320 | Castanea pumila var. pumila |
| NCU00155310 | Castanea pumila var. pumila |
| NCU00155309 | Castanea pumila var. pumila |
| NCU00155308 | Castanea pumila var. pumila |
| NCU00155315 | Castanea pumila var. pumila |
| NCU00089777 | Castanea pumila var. pumila |
| NCU00155311 | Castanea pumila var. pumila |
| NCU00155314 | Castanea pumila var. pumila |
| NCU00155304 | Castanea pumila var. pumila |
| NCU00155303 | Castanea pumila var. pumila |
| NCU00135543 | Castanea pumila var. pumila |
| NCU00155319 | Castanea pumila var. pumila |
| NCU00155321 | Castanea dentata            |
| NCU00135547 | Castanea crenata            |
| NCU00155322 | Castanea dentata            |
| NCU00155170 | Castanea pumila var. pumila |
| NCU00155197 | Castanea pumila var. pumila |
| NCU00155196 | Castanea pumila var. pumila |
| NCU00155195 | Castanea pumila var. pumila |
| NCU00155194 | Castanea pumila var. pumila |
| NCU00155199 | Castanea pumila var. pumila |
| NCU00155178 | Castanea pumila var. pumila |
| NCU00155177 | Castanea pumila var. pumila |
| NCU00155181 | Castanea pumila var. pumila |
| NCU00155358 | Castanea pumila var. pumila |
| NCU00155361 | Castanea pumila var. pumila |
| NCU00155365 | Castanea pumila var. pumila |
| NCU00155364 | Castanea pumila var. pumila |

|             |                                 |
|-------------|---------------------------------|
| NCU00155363 | Castanea pumila var. pumila     |
| NCU00155370 | Castanea pumila var. pumila     |
| NCU00155359 | Castanea pumila var. pumila     |
| NCU00155381 | Castanea crenata                |
| NCU00155380 | Castanea crenata                |
| NCU00155379 | Castanea crenata                |
| NCU00155378 | Castanea crenata                |
| NCU00155377 | Castanea crenata                |
| NCU00155376 | Castanea crenata                |
| NCU00155323 | Castanea dentata                |
| NCU00155330 | Castanea dentata                |
| NCU00155325 | Castanea dentata                |
| NCU00155327 | Castanea dentata                |
| NCU00155324 | Castanea dentata                |
| NCU00155334 | Castanea dentata                |
| NCU00155335 | Castanea dentata                |
| NCU00155336 | Castanea dentata                |
| NCU00155329 | Castanea dentata                |
| NCU00155326 | Castanea dentata                |
| NCU00155347 | Castanea dentata                |
| NCU00155332 | Castanea dentata                |
| NCU00155331 | Castanea dentata                |
| NCU00155338 | Castanea dentata                |
| NCU00155333 | Castanea dentata                |
| NCU00155339 | Castanea dentata                |
| NCU00155342 | Castanea dentata                |
| NCU00155341 | Castanea dentata                |
| NCU00155340 | Castanea dentata                |
| NCU00155345 | Castanea dentata                |
| NCU00155344 | Castanea dentata                |
| NCU00155343 | Castanea dentata                |
| NCU00155353 | Castanea pumila var. ozarkensis |
| NCU00155350 | Castanea pumila var. ozarkensis |
| NCU00154917 | Castanea pumila var. pumila     |
| NCU00154916 | Castanea pumila var. pumila     |
| NCU00154915 | Castanea pumila var. pumila     |
| NCU00154914 | Castanea pumila var. pumila     |
| NCU00135545 | Castanea pumila var. pumila     |
| NCU00154934 | Castanea pumila var. pumila     |
| NCU00154933 | Castanea pumila var. pumila     |
| NCU00154931 | Castanea pumila var. pumila     |
| NCU00154930 | Castanea pumila var. pumila     |
| NCU00154929 | Castanea pumila var. pumila     |
| NCU00154928 | Castanea pumila var. pumila     |
| NCU00154927 | Castanea pumila var. pumila     |

|             |                             |                                                                                        |
|-------------|-----------------------------|----------------------------------------------------------------------------------------|
| NCU00154926 | Castanea pumila var. pumila |                                                                                        |
| NCU00154925 | Castanea pumila var. pumila |                                                                                        |
| NCU00135546 | Castanea pumila var. pumila |                                                                                        |
| NCU00154924 | Castanea pumila var. pumila |                                                                                        |
| NCU00154935 | Castanea pumila var. pumila |                                                                                        |
| NCU00154945 | Castanea pumila var. pumila |                                                                                        |
| NCU00154943 | Castanea pumila var. pumila |                                                                                        |
| NCU00154942 | Castanea pumila var. pumila |                                                                                        |
| NCU00154941 | Castanea pumila var. pumila |                                                                                        |
| NCU00154940 | Castanea pumila var. pumila |                                                                                        |
| NCU00154939 | Castanea pumila var. pumila |                                                                                        |
| NCU00154939 | Castanea pumila var. pumila |                                                                                        |
| NCU00154938 | Castanea pumila var. pumila |                                                                                        |
| NCU00154936 | Castanea pumila var. pumila |                                                                                        |
| NCU00154946 | Castanea pumila var. pumila |                                                                                        |
| NCU00154919 | Castanea pumila var. pumila |                                                                                        |
| NCU00154920 | Castanea pumila var. pumila |                                                                                        |
| NCU00154922 | Castanea pumila var. pumila |                                                                                        |
| NCU00154923 | Castanea pumila var. pumila |                                                                                        |
| NCU00155162 | Castanea pumila var. pumila |                                                                                        |
| NCU00155161 | Castanea pumila var. pumila |                                                                                        |
| NCU00155160 | Castanea pumila var. pumila |                                                                                        |
| NCU00155159 | Castanea pumila var. pumila |                                                                                        |
| NCU00155158 | Castanea pumila var. pumila |                                                                                        |
| NCU00155157 | Castanea pumila var. pumila |                                                                                        |
| NCU00155156 | Castanea pumila var. pumila |                                                                                        |
| NCU00155134 | Castanea pumila var. pumila |                                                                                        |
| NCU00155121 | Castanea pumila var. pumila |                                                                                        |
| NCU00155127 | Castanea pumila var. pumila |                                                                                        |
| NCU00155123 | Castanea pumila var. pumila |                                                                                        |
| NCU00155124 | Castanea pumila var. pumila |                                                                                        |
| NCU00155125 | Castanea pumila var. pumila |                                                                                        |
| NCU00155126 | Castanea pumila var. pumila |                                                                                        |
| NCU00155154 | Castanea pumila var. pumila |                                                                                        |
| NCU00155163 | Castanea pumila var. pumila |                                                                                        |
| NCU00155144 | Castanea pumila var. pumila |                                                                                        |
| NCU00155143 | Castanea pumila var. pumila |                                                                                        |
| NCU00155153 | Castanea pumila var. pumila |                                                                                        |
| NCU00155146 | Castanea pumila var. pumila |                                                                                        |
| NCU00155374 | Castanea sativa             | Note the long petioles, stout twigs, small lenticels, elongate leaves, and large buds. |
| NCU00155372 | Castanea mollissima         |                                                                                        |
| NCU00155373 | Castanea sativa             |                                                                                        |
| NCU00155368 | Castanea pumila var. pumila |                                                                                        |

|             |                                           |                                                                                                                      |
|-------------|-------------------------------------------|----------------------------------------------------------------------------------------------------------------------|
| NCU00155367 | <i>Castanea pumila</i> var. <i>pumila</i> |                                                                                                                      |
| NCU00155366 | <i>Castanea pumila</i> var. <i>pumila</i> |                                                                                                                      |
| NCU00155371 | <i>Castanea pumila</i> var. <i>pumila</i> |                                                                                                                      |
| NCU00155392 | <i>Castanea seguinii</i>                  | Burs at multiple nodes along the stem are evidence of the continuous flowering typical of <i>Castanea seguinii</i> . |
| NCU00155396 | <i>Castanea sativa</i>                    |                                                                                                                      |
| NCU00155382 | <i>Castanea crenata</i>                   |                                                                                                                      |
| NCU00155394 | <i>Castanea sativa</i>                    | We think this is from Manali, Himachal Pradesh, India                                                                |
| NCU00155393 | <i>Castanea sativa</i>                    |                                                                                                                      |
| NCU00155384 | <i>Castanea henryi</i>                    |                                                                                                                      |
| NCU00155383 | <i>Castanea seguinii</i>                  | Burs at multiple nodes along the stem are evidence of the continuous flowering typical of <i>Castanea seguinii</i> . |
| NCU00155397 | <i>Castanea sativa</i>                    |                                                                                                                      |
| NCU00155391 | <i>Castanea sativa</i>                    |                                                                                                                      |
| NCU00155388 | <i>Castanea sativa</i>                    |                                                                                                                      |
| NCU00155390 | <i>Castanea sativa</i>                    |                                                                                                                      |
| NCU00155387 | <i>Castanea sativa</i>                    |                                                                                                                      |
| NCU00155386 | <i>Castanea sativa</i>                    |                                                                                                                      |
| NCU00155385 | <i>Castanea henryi</i>                    |                                                                                                                      |
| NCU00155180 | <i>Castanea pumila</i> var. <i>pumila</i> |                                                                                                                      |
| NCU00155182 | <i>Castanea pumila</i> var. <i>pumila</i> |                                                                                                                      |
| NCU00155185 | <i>Castanea pumila</i> var. <i>pumila</i> |                                                                                                                      |
| NCU00155190 | <i>Castanea pumila</i> var. <i>pumila</i> |                                                                                                                      |
| NCU00155193 | <i>Castanea pumila</i> var. <i>pumila</i> |                                                                                                                      |
| NCU00155192 | <i>Castanea pumila</i> var. <i>pumila</i> |                                                                                                                      |
| NCU00155202 | <i>Castanea pumila</i> var. <i>pumila</i> |                                                                                                                      |
| NCU00155201 | <i>Castanea pumila</i> var. <i>pumila</i> |                                                                                                                      |
| NCU00155200 | <i>Castanea pumila</i> var. <i>pumila</i> |                                                                                                                      |
| NCU00155208 | <i>Castanea pumila</i> var. <i>pumila</i> |                                                                                                                      |
| NCU00155207 | <i>Castanea pumila</i> var. <i>pumila</i> |                                                                                                                      |
| NCU00155206 | <i>Castanea pumila</i> var. <i>pumila</i> |                                                                                                                      |
| NCU00155205 | <i>Castanea pumila</i> var. <i>pumila</i> |                                                                                                                      |
| NCU00155204 | <i>Castanea pumila</i> var. <i>pumila</i> |                                                                                                                      |
| NCU00155171 | <i>Castanea pumila</i> var. <i>pumila</i> |                                                                                                                      |
| NCU00155176 | <i>Castanea pumila</i> var. <i>pumila</i> |                                                                                                                      |
| NCU00155175 | <i>Castanea pumila</i> var. <i>pumila</i> |                                                                                                                      |
| NCU00155174 | <i>Castanea pumila</i> var. <i>pumila</i> |                                                                                                                      |
| NCU00146417 | <i>Castanea pumila</i> var. <i>pumila</i> |                                                                                                                      |
| NCU00027810 | <i>Castanea pumila</i> var. <i>pumila</i> |                                                                                                                      |
| NCU00155168 | <i>Castanea pumila</i> var. <i>pumila</i> |                                                                                                                      |
| NCU00155167 | <i>Castanea pumila</i> var. <i>pumila</i> |                                                                                                                      |

|             |                             |
|-------------|-----------------------------|
| NCU00155166 | Castanea pumila var. pumila |
| NCU00155165 | Castanea pumila var. pumila |
| NCU00155164 | Castanea pumila var. pumila |
| NCU00155172 | Castanea pumila var. pumila |
| NCU00155189 | Castanea pumila var. pumila |
| NCU00155188 | Castanea pumila var. pumila |
| NCU00155187 | Castanea pumila var. pumila |
| NCU00155145 | Castanea pumila var. pumila |
| NCU00155150 | Castanea pumila var. pumila |
| NCU00155148 | Castanea pumila var. pumila |
| NCU00155149 | Castanea pumila var. pumila |
| NCU00155152 | Castanea pumila var. pumila |
| NCU00155135 | Castanea pumila var. pumila |
| NCU00155137 | Castanea pumila var. pumila |
| NCU00155136 | Castanea pumila var. pumila |
| NCU00155141 | Castanea pumila var. pumila |
| NCU00155140 | Castanea pumila var. pumila |
| NCU00155139 | Castanea pumila var. pumila |
| NCU00155131 | Castanea pumila var. pumila |
| NCU00155130 | Castanea pumila var. pumila |
| NCU00155133 | Castanea pumila var. pumila |
| NCU00155128 | Castanea pumila var. pumila |
| NCU00155389 | Castanea sativa             |
| NCU00155129 | Castanea pumila var. pumila |

810

811

812

813

814

815

816

817

818

819

820

821 Appendix S4. Illumina sequencing summary. Samples highlighted in yellow were not used for genotyping due to a low number  
822 (<100,000) of total reads. Samples highlighted in blue are technical replicates of *C. mollissima* and *C. crenata* cultivars that were not  
823 genotyped because they produced the fewest retained reads of two technical replicates per cultivar.  
824

| well ID | DNA tube name | Species           | barcode    | GBS ID | SRA filename | Total reads | NoRadTag | LowQuality | Retained reads | depth of coverage |
|---------|---------------|-------------------|------------|--------|--------------|-------------|----------|------------|----------------|-------------------|
| A1      | A1            | C. p. var. pumila | TGACGCCA   | 1      | cv_1         | 2369236     | 6978     | 3665       | 2358593        | 27                |
| B1      | CEF1          | C. dentata        | CAGATA     | 2      | cv_2         | 3289014     | 12714    | 5165       | 3271135        | 38                |
| C1      | BF6           | C. dentata        | GAAGTG     | 3      | cv_3         | 4022872     | 22782    | 6187       | 3993903        | 44                |
| D1      | 669           | C. dentata        | TAGCGGAT   | 4      | cv_4         | 464578      | 2178     | 663        | 461737         | 19                |
| E1      | A2            | C. p. var. pumila | TATTCGCAT  | 5      | cv_5         | 7041114     | 19157    | 10723      | 7011234        | 59                |
| F1      | CEF2          | C. dentata        | ATAGAT     | 6      | cv_6         | 4644790     | 16713    | 7335       | 4620742        | 49                |
| G1      | CR1           | C. dentata        | CCGAACA    | 7      | cv_7         | 6328058     | 14423    | 9999       | 6303636        | 61                |
| H1      | 710           | C. dentata        | GGAAGACAT  | 8      | cv_8         | 183218      | 3942     | 253        | 179023         | 17                |
| A2      | A3            | C. p. var. pumila | GGCTTA     | 9      | cv_9         | 5596302     | 14166    | 8700       | 5573436        | 48                |
| B2      | CEF3          | C. dentata        | AACGCACATT | 10     | cv_10        | 2745442     | 11419    | 4155       | 2729868        | 35                |
| C2      | CR2           | C. dentata        | GAGCGACAT  | 11     | cv_11        | 5654802     | 12022    | 8831       | 5633949        | 56                |
| D2      | 675           | C. dentata        | CCTTGCCATT | 12     | cv_12        | 1292256     | 6238     | 1907       | 1284111        | 27                |
| E2      | A4            | C. p. var. pumila | GGTATA     | 13     | cv_13        | 10175602    | 26508    | 15541      | 10133553       | 73                |
| F2      | CEF4          | C. dentata        | TCTTGG     | 14     | cv_14        | 4731848     | 17074    | 7141       | 4707633        | 48                |
| G2      | CR3           | C. p. var. pumila | GGTGT      | 15     | cv_15        | 4269384     | 38568    | 6651       | 4224165        | 39                |
| H2      | KYADA1        | C. dentata        | GGATA      | 16     | cv_16        | 1885530     | 20109    | 2789       | 1862632        | 28                |
| A3      | A5            | C. p. var. pumila | CTAAGCA    | 17     | cv_17        | 7324422     | 22242    | 11549      | 7290631        | 59                |
| B3      | G1            | C. dentata        | ATTAT      | 18     | cv_18        | 6351844     | 28447    | 9745       | 6313652        | 54                |
| C3      | CR4           | C. p. var. pumila | GCGCTCA    | 19     | cv_19        | 8560246     | 17846    | 13200      | 8529200        | 66                |
| D3      | G2            | C. p. var. pumila | ACTGCGAT   | 20     | cv_20        | 8004334     | 15649    | 12144      | 7976541        | 67                |
| E3      | CR5           | C. p. var. pumila | TTCGTT     | 21     | cv_21        | 8540658     | 22051    | 13177      | 8505430        | 66                |



|    |     |                          |            |    |       |          |       |       |          |    |
|----|-----|--------------------------|------------|----|-------|----------|-------|-------|----------|----|
| F3 | 412 | <i>C. alabamensis</i>    | ATATAA     | 22 | cv_22 | 652780   | 8800  | 1023  | 642957   | 23 |
| G3 | A7  | <i>C. p. var. pumila</i> | TGGCAACAGA | 23 | cv_23 | 2983238  | 7788  | 4758  | 2970692  | 36 |
| H3 | G3  | <i>C. p. var. pumila</i> | CTCGTCCG   | 24 | cv_24 | 10297574 | 19305 | 15794 | 10262475 | 75 |
| A4 | CR6 | <i>C. p. var. pumila</i> | GCCTACCT   | 25 | cv_25 | 4413006  | 10728 | 6775  | 4395503  | 52 |
| B4 | 735 | <i>C. p. var. pumila</i> | CACCA      | 26 | cv_26 | 184696   | 33774 | 204   | 150718   | 17 |
| C4 | 645 | <i>C. dentata</i>        | AATTAG     | 27 | cv_27 | 1585046  | 12563 | 2406  | 1570077  | 28 |
| D4 | A8  | <i>C. p. var. pumila</i> | GGAACGA    | 28 | cv_28 | 5037102  | 13672 | 7953  | 5015477  | 50 |
| E4 | BF1 | <i>C. p. var. pumila</i> | ACAACCT    | 29 | cv_29 | 7777390  | 45883 | 11685 | 7719822  | 65 |
| F4 | CR7 | <i>C. p. var. pumila</i> | ACTGCT     | 30 | cv_30 | 8891970  | 39077 | 13829 | 8839064  | 72 |
| G4 | 646 | <i>C. dentata</i>        | CGTGGACAGT | 31 | cv_31 | 2191268  | 10454 | 3459  | 2177355  | 33 |
| H4 | A9  | <i>C. p. var. pumila</i> | TGGCACAGA  | 32 | cv_32 | 8534758  | 18418 | 13267 | 8503073  | 74 |
| A5 | BF2 | <i>C. p. var. pumila</i> | TGCTT      | 33 | cv_33 | 8839182  | 28483 | 13472 | 8797227  | 80 |
| B5 | 671 | <i>C. dentata</i>        | GCAAGCCAT  | 34 | cv_34 | 1394902  | 5541  | 2242  | 1387119  | 28 |
| C5 | 647 | <i>C. p. var. pumila</i> | CGCACCAATT | 35 | cv_35 | 320568   | 7879  | 467   | 312222   | 17 |
| D5 | A10 | <i>C. p. var. pumila</i> | CTCGCGG    | 36 | cv_36 | 6173688  | 17069 | 9276  | 6147343  | 56 |
| E5 | BF3 | <i>C. p. var. pumila</i> | AACTGG     | 37 | cv_37 | 12554228 | 38341 | 19181 | 12496706 | 66 |
| F5 | 420 | <i>C. alabamensis</i>    | ATGAGCAA   | 38 | cv_38 | 387424   | 3119  | 604   | 383701   | 19 |
| G5 | 672 | <i>C. dentata</i>        | CTTGA      | 39 | cv_39 | 2862578  | 12325 | 4294  | 2845959  | 43 |
| H5 | 648 | <i>C. p. var. pumila</i> | GCGTCCT    | 40 | cv_40 | 2444192  | 18776 | 3696  | 2421720  | 35 |
| A6 | WB1 | <i>C. p. var. pumila</i> | ACCAGGA    | 41 | cv_41 | 3358210  | 12294 | 5071  | 3340845  | 38 |
| B6 | BF4 | <i>C. p. var. pumila</i> | CCACTCA    | 42 | cv_42 | 3518126  | 8355  | 5469  | 3504302  | 39 |
| C6 | 649 | <i>C. p. var. pumila</i> | TCACGGAAG  | 43 | cv_43 | 485544   | 11104 | 754   | 473686   | 18 |
| D6 | WB2 | <i>C. p. var. pumila</i> | TATCA      | 44 | cv_44 | 4396572  | 70444 | 6770  | 4319358  | 43 |

|    |     |                          |            |    |       |         |       |      |         |    |
|----|-----|--------------------------|------------|----|-------|---------|-------|------|---------|----|
| E6 | BF5 | C. dentata               | TAGCCAA    | 45 | cv_45 | 5960384 | 54571 | 9082 | 5896731 | 54 |
| F6 | 650 | C. p. var.<br>pumila     | ATATCGCCA  | 46 | cv_46 | 818876  | 5146  | 1210 | 812520  | 21 |
| G6 | 651 | C. p. var.<br>pumila     | CTCTA      | 47 | cv_47 | 1798116 | 11713 | 2695 | 1783708 | 29 |
| H6 | 652 | C. p. var.<br>pumila     | GGTGCACATT | 48 | cv_48 | 625570  | 9729  | 942  | 614899  | 19 |
| A7 | 653 | C. p. var.<br>pumila     | CTCTCGCAT  | 49 | cv_49 | 8848    | 675   | 7    | 8166    | 14 |
| B7 | 507 | C. dentata               | CAGAGGT    | 50 | cv_50 | 3613706 | 15383 | 5525 | 3592798 | 48 |
| C7 | 513 | C. dentata               | GCGTACAAT  | 51 | cv_51 | 2153114 | 5350  | 3402 | 2144362 | 34 |
| D7 | 514 | C. dentata               | ACGCGCG    | 52 | cv_52 | 2873730 | 11423 | 4383 | 2857924 | 39 |
| E7 | 124 | C. p. var.<br>pumila     | GTCGCCT    | 53 | cv_53 | 3416422 | 10973 | 5181 | 3400268 | 46 |
| F7 | 525 | C. p. var.<br>pumila     | AATAACCAA  | 54 | cv_54 | 3719032 | 15301 | 5694 | 3698037 | 48 |
| G7 | 126 | C. p. var.<br>pumila     | AATGAACGA  | 55 | cv_55 | 3127094 | 9484  | 4951 | 3112659 | 43 |
| H7 | 527 | C. p. var.<br>pumila     | CGTCGCCACT | 56 | cv_56 | 1746    | 527   | 2    | 1217    | 10 |
| A8 | 528 | C. p. var.<br>pumila     | ATGGCAA    | 57 | cv_57 | 1723710 | 7468  | 2780 | 1713462 | 31 |
| B8 | 529 | C. p. var.<br>pumila     | GAAGCA     | 58 | cv_58 | 157746  | 24598 | 216  | 132932  | 16 |
| C8 | 531 | C. dentata               | AACGTGCCT  | 59 | cv_59 | 159562  | 1636  | 234  | 157692  | 16 |
| D8 | 532 | C. p. var.<br>pumila     | CCTCG      | 60 | cv_60 | 2484538 | 64197 | 3632 | 2416709 | 35 |
| E8 | 535 | C. p. var.<br>pumila     | CTCAT      | 61 | cv_61 | 4260888 | 60936 | 6472 | 4193480 | 49 |
| F8 | 149 | C. p. var.<br>pumila     | ACGGTACT   | 62 | cv_62 | 2042698 | 6087  | 3181 | 2033430 | 32 |
| G8 | 694 | C. p. var.<br>ozarkensis | GCGCCG     | 63 | cv_63 | 5953966 | 73081 | 8866 | 5872019 | 57 |
| H8 | 705 | C. p. var.<br>ozarkensis | CAAGT      | 64 | cv_64 | 1454382 | 74121 | 2129 | 1378132 | 28 |
| A9 | 673 | C. dentata               | TCCGAG     | 65 | cv_65 | 3028130 | 10212 | 4608 | 3013310 | 42 |
| B9 | 674 | C. dentata               | TAGATGA    | 66 | cv_66 | 2085178 | 11179 | 3206 | 2070793 | 32 |
| C9 | H1  | C. alabamensis           | TGGCCAG    | 67 | cv_67 | 5726678 | 20229 | 8575 | 5697874 | 53 |
| D9 | H2  | C. dentata               | GCACGAT    | 68 | cv_68 | 4051206 | 20702 | 6386 | 4024118 | 44 |

|     |      |                      |            |    |       |         |        |       |         |    |
|-----|------|----------------------|------------|----|-------|---------|--------|-------|---------|----|
| E9  | H3   | C. dentata           | TTGCTG     | 69 | cv_69 | 2144734 | 9074   | 3271  | 2132389 | 34 |
| F9  | H4   | C. dentata           | CGCAACCAGT | 70 | cv_70 | 2846048 | 8484   | 4285  | 2833279 | 40 |
| G9  | F1   | C. dentata           | TCACTG     | 71 | cv_71 | 5066636 | 23183  | 7716  | 5035737 | 56 |
| H9  | F5   | C. dentata           | ACAGT      | 72 | cv_72 | 7189348 | 49805  | 11066 | 7128477 | 72 |
| A10 | AG1  | C. alabamensis       | GGAGTCAAG  | 73 | cv_73 | 4533302 | 10877  | 7160  | 4515265 | 48 |
| B10 | AG2  | C. dentata           | TGAAT      | 74 | cv_74 | 4696900 | 88410  | 7177  | 4601313 | 49 |
| C10 | AG3  | C. alabamensis       | CATAT      | 75 | cv_75 | 6806594 | 480687 | 9691  | 6316216 | 57 |
| D10 | AG6  | C. alabamensis       | GTGACACAT  | 76 | cv_76 | 8693168 | 20173  | 13627 | 8659368 | 63 |
| E10 | AG7  | C. alabamensis       | TATGT      | 77 | cv_77 | 9244322 | 26806  | 14408 | 9203108 | 80 |
| F10 | L14  | C. dentata           | CAGTGCCATT | 78 | cv_78 | 6036182 | 13627  | 9387  | 6013168 | 60 |
| G10 | L19  | C. dentata           | ACAACCAACT | 79 | cv_79 | 5539000 | 22750  | 8480  | 5507770 | 57 |
| H10 | SS2  | C. p. var.<br>pumila | TGCAGA     | 80 | cv_80 | 4056690 | 22128  | 6154  | 4028408 | 51 |
| A11 | SS3  | C. p. var.<br>pumila | CATCTGCCG  | 81 | cv_81 | 708390  | 2772   | 1095  | 704523  | 21 |
| B11 | SS4  | C. p. var.<br>pumila | GGACAG     | 82 | cv_82 | 5588968 | 21131  | 8641  | 5559196 | 63 |
| C11 | LIN1 | C. dentata           | ATCTGT     | 83 | cv_83 | 7461978 | 19509  | 11699 | 7430770 | 71 |
| D11 | F3   | C. dentata           | AAGACGCT   | 84 | cv_84 | 3353160 | 10272  | 5270  | 3337618 | 37 |
| E11 | AG4  | C. alabamensis       | GAATGCAATA | 85 | cv_85 | 6908794 | 24796  | 10926 | 6873072 | 60 |
| F11 | H9   | C. alabamensis       | TAGCAG     | 86 | cv_86 | 491558  | 27366  | 698   | 463494  | 13 |
| G11 | AG5  | C. alabamensis       | ATCCG      | 87 | cv_87 | 118870  | 25961  | 139   | 92770   | 13 |
| H11 | L10  | C. dentata           | CTTAG      | 88 | cv_88 | 3987598 | 13931  | 6114  | 3967553 | 47 |
| A12 | H6   | C. alabamensis       | TTATTACAT  | 89 | cv_89 | 1985086 | 8208   | 2995  | 1973883 | 31 |
| B12 | CH21 | C. alabamensis       | GCCAACAAGA | 90 | cv_90 | 514854  | 2455   | 743   | 511656  | 19 |
| C12 | CH22 | C. dentata           | TGCCGCAT   | 91 | cv_91 | 6034174 | 199398 | 9196  | 5825580 | 56 |
| D12 | CH23 | C. alabamensis       | CGTGTC A   | 92 | cv_92 | 1193850 | 9430   | 1709  | 1182711 | 24 |
| E12 | CH24 | C. alabamensis       | CAACCACACA | 93 | cv_93 | 2972860 | 10879  | 4486  | 2957495 | 37 |
| F12 | CH25 | C. alabamensis       | GCTCCGA    | 94 | cv_94 | 3299294 | 7773   | 4888  | 3286633 | 39 |
| G12 | CH26 | C. alabamensis       | TCAGAGAT   | 95 | cv_95 | 2696792 | 45481  | 4293  | 2647018 | 37 |

|                                                                                                                  |      |                             |            |     |                |          |         |       |          |      |
|------------------------------------------------------------------------------------------------------------------|------|-----------------------------|------------|-----|----------------|----------|---------|-------|----------|------|
| H12                                                                                                              | CH27 | C. p. var. pumila           | CGTTCA     | 96  | cv_96          | 3903682  | 19055   | 6025  | 3878602  | 40   |
| A11                                                                                                              |      | C. dentata AD98             | CATCTGCCG  | 97  | cv_97          | 1858140  | 8912    | 5260  | 1843968  | 21   |
| B11                                                                                                              |      | C. molissima Mahogany       | GGACAG     | 98  | cv_98          | 13652574 | 75331   | 37598 | 13539645 | 54   |
| C11                                                                                                              |      | C. molissima Mahogany       | ATCTGT     | 99  | cv_99          | 15041542 | 66372   | 41249 | 14933921 | #N/A |
| D11                                                                                                              |      | C. molissima Nanking        | AAGACGCT   | 100 | cv_100         | 11359132 | 50407   | 31615 | 11277110 | 56   |
| E11                                                                                                              |      | C. mollissima Nanking       | GAATGCAATA | 101 | cv_101         | 5894876  | 46111   | 16604 | 5832161  | #N/A |
| F11                                                                                                              |      | C. dentata NC DOT           | TAGCAG     | 102 | cv_102         | 11053870 | 2042580 | 20919 | 8990371  | 56   |
| G11                                                                                                              |      | C. dentata Cranberry        | ATCCG      | 103 | cv_103         | 6282890  | 63302   | 16997 | 6202591  | 34   |
| H11                                                                                                              |      | C. crenata Fort Defiance    | CTTAG      | 104 | cv_104         | 15531680 | 1419895 | 36228 | 14075557 | 56   |
| A12                                                                                                              |      | C. crenata Fort Defiance    | TTATTACAT  | 105 | cv_105         | 6862274  | 33527   | 19145 | 6809602  | #N/A |
| B12                                                                                                              |      | C. crenata Morrow Mountain  | GCCAACAAGA | 106 | cv_106         | 3412182  | 18856   | 9703  | 3383623  | #N/A |
| C12                                                                                                              |      | C. crenata Morrow Mountain  | TGCCGCAT   | 107 | cv-107         | 4919620  | 149206  | 13435 | 4756979  | 41   |
| D12                                                                                                              |      | C. crenata Rita #1          | CGTGTC     | 108 | cv_108         | 4964916  | 34518   | 13384 | 4917014  | 43   |
| E12                                                                                                              |      | C. dentata Haun (PennState) | CAACCACACA | 109 | cv_109         | 4530     | 369     | 12    | 4149     | #N/A |
| F12                                                                                                              |      | C. crenata Rita #2          | GCTCCGA    | 110 | cv_110         | 7019724  | 29611   | 19432 | 6970681  | 58   |
| Plants excluded from genotyping due to <100000 reads (highlighted in yellow)                                     |      |                             |            |     | 49, 56, 109    |          |         |       |          |      |
| Lower quality replicates of Asian cultivars excluded from genotyping (highlighted in blue)                       |      |                             |            |     | 99,101,105,106 |          |         |       |          |      |
| Total reads for 106 plants including all technical replicates of E. Asian Castanea cultivars                     |      |                             |            |     | 489935694      |          |         |       |          |      |
| Total reads for 106 plants (only counting only the best replicate of each E. Asian cultivar used for genotyping) |      |                             |            |     | 458724820      |          |         |       |          |      |
| Total individual plants sequenced                                                                                |      |                             |            |     | 106            |          |         |       |          |      |

|                                                          |            |  |  |  |  |  |
|----------------------------------------------------------|------------|--|--|--|--|--|
| Total retained reads for 106 plants                      | 451514582  |  |  |  |  |  |
| total samples retained                                   | 103        |  |  |  |  |  |
| Percentage reads retained                                | 98.4281997 |  |  |  |  |  |
| Average clean reads per retained individual              | 4383505.34 |  |  |  |  |  |
| average coverage depth per retained individual (103 tot) | 43.688835  |  |  |  |  |  |

825

826

827

828

829

830 Appendix S5. Summary of datasets exported by Stacks 1.45.

| Dataset name | File name on GitHub     | Taxa included                                                                                                                                                        | Total individuals | Total SNPs |
|--------------|-------------------------|----------------------------------------------------------------------------------------------------------------------------------------------------------------------|-------------------|------------|
| NAC+EAC      | batch_1.vcf             | <i>C. alabamensis</i> , <i>C. dentata</i> , <i>C. pumila</i> var. <i>pumila</i> , <i>C. pumila</i> var. <i>ozarkensis</i> , <i>C. crenata</i> , <i>C. mollissima</i> | 103               | 103,616    |
| NAC          | out98copy.vcf           | <i>C. alabamensis</i> , <i>C. dentata</i> , <i>C. pumila</i> var. <i>pumila</i> , <i>C. pumila</i> var. <i>ozarkensis</i>                                            | 96                | 190,656    |
| NAC+EAC583   | allsamples_popcodes.txt | <i>C. alabamensis</i> , <i>C. dentata</i> , <i>C. pumila</i> var. <i>pumila</i> , <i>C. pumila</i> var. <i>ozarkensis</i> , <i>C. crenata</i> , <i>C. mollissima</i> | 103               | 583        |

831

832

833

834

835

836

837

838

839

840

841

842

843 Appendix S6. Maximum likelihood phylogenetic tree showing identities of individual samples at  
844 branch tips. Samples representing *C. alabamensis* are highlighted in red. Numbers at nodes  
845 indicate bootstrap support. Scale bar is proportional to 0.07 substitutions/site.

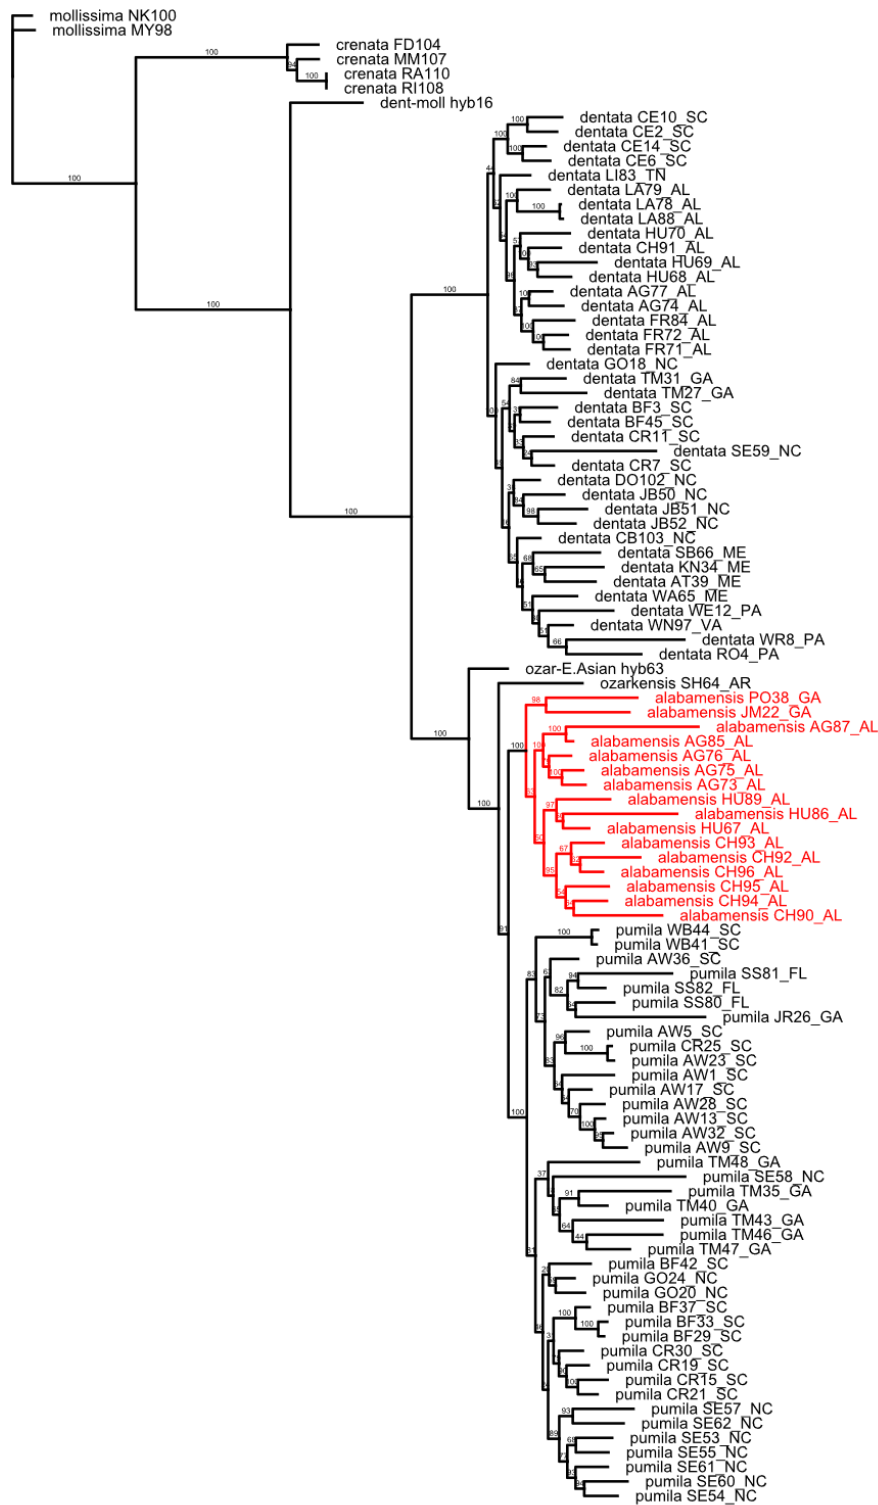

846

0.07

847 Appendix S7. Weir and Cockerham's *Fst* between taxa pairs, summary of STRUCTURE  
 848 analyses, and list of principal components.

849 **Table S7a. Weir and Cockerham's *Fst* output from SNPrelate Output: "Fst" = weighted *Fst***  
 850 **estimate**

|             | mollissima | crenata   | dentata   | pumila    | ozarkensis | alabamensis |
|-------------|------------|-----------|-----------|-----------|------------|-------------|
| mollissima  |            | 0.5271483 | 0.6433073 | 0.6378966 | 0.7069509  | 0.6633516   |
| crenata     | 0.5271483  |           | 0.6409639 | 0.6345136 | 0.6765049  | 0.6569612   |
| dentata     | 0.6433073  | 0.6409639 |           | 0.3846462 | 0.4182757  | 0.3985978   |
| pumila      | 0.6378966  | 0.6345136 | 0.3846462 |           | 0.1668146  | 0.1078042   |
| ozarkensis  | 0.7069509  | 0.6765049 | 0.4182757 | 0.1668146 |            | 0.204663    |
| alabamensis | 0.6633516  | 0.6569612 | 0.3985978 | 0.1078042 | 0.204663   |             |

851

852 **Table S7b. Output of summary statistics from *Structure* analysis of *C. dentata*, *C. pumila***  
 853 ***sensu lato*, *C. mollissima*, and *C. crenata*.** Statistics were calculated using the program  
 854 STRUCTURE HARVESTER (Earl and vonHoldt 2012). The number of clusters present in the  
 855 dataset ( $K = 3$ ) was determined using the method of Evanno et al. (2005).  $K = 3$  and associated  
 856  $\Delta K$  value are highlighted in yellow.

857

| K        | Reps | Mean LnP(K) | Stdev LnP(K) | Ln'(K)   | Ln''(K) | Delta K         |
|----------|------|-------------|--------------|----------|---------|-----------------|
| 1        | 10   | -16771.91   | 1.349444     | —        | —       | —               |
| 2        | 10   | -13981.87   | 288.972021   | 2790.04  | 887.69  | 3.071889        |
| <b>3</b> | 10   | -12079.52   | 15.195599    | 1902.35  | 1906.02 | <b>125.4324</b> |
| 4        | 10   | -12083.19   | 216.654187   | -3.67    | 974.83  | 4.499475        |
| 5        | 10   | -13061.69   | 2928.160213  | -978.5   | 3100.42 | 1.058829        |
| 6        | 10   | -17140.61   | 8393.275267  | -4078.92 | 6007.02 | 0.715694        |
| 7        | 10   | -15212.51   | 5278.254233  | 1928.1   | 3060.45 | 0.579822        |
| 8        | 10   | -16344.86   | 7472.795325  | -1132.35 | 717.02  | 0.095951        |
| 9        | 10   | -16760.19   | 9230.403714  | -415.33  | —       | —               |

858

859

860

861

862

863

864



865 **Table S7c. Output of summary statistics from *Structure* analysis of chinquapin samples.**  
866 Statistics were calculated using the program STRUCTURE HARVESTER (Earl and vonHoldt  
867 2012). The number of clusters present in the dataset ( $K = 2$ ) was determined using the method of  
868 Evanno et al. (2005).  $K = 2$  and associated  $\Delta K$  value are highlighted in yellow.

869

| K        | Reps | Mean LnP(K) | Stdev LnP(K) | Ln'(K)  | Ln'(K) | Delta K         |
|----------|------|-------------|--------------|---------|--------|-----------------|
| 1        | 10   | -6426.61    | 0.479467     | —       | —      | —               |
| <b>2</b> | 10   | -6041.17    | 2.833941     | 385.44  | 296.32 | <b>104.5611</b> |
| 3        | 10   | -5952.05    | 137.78048    | 89.12   | 31.65  | 0.229713        |
| 4        | 10   | -5831.28    | 39.063219    | 120.77  | 449.57 | 11.50878        |
| 5        | 10   | -6160.08    | 1208.25738   | -328.8  | 644.53 | 0.533438        |
| 6        | 10   | -5844.35    | 182.341421   | 315.73  | 265.61 | 1.456663        |
| 7        | 10   | -5794.23    | 223.654088   | 50.12   | 222.98 | 0.996986        |
| 8        | 10   | -5967.09    | 647.43212    | -172.86 | 301.03 | 0.46496         |
| 9        | 10   | -5838.92    | 294.650689   | 128.17  | 423.32 | 1.436684        |
| 10       | 10   | -6134.07    | 1064.66472   | -295.15 | 525.14 | 0.493244        |
| 11       | 10   | -5904.08    | 372.702293   | 229.99  | 285.78 | 0.766778        |
| 12       | 10   | -5959.87    | 336.013763   | -55.79  | 154.31 | 0.459237        |
| 13       | 10   | -5861.35    | 275.391916   | 98.52   | 128.35 | 0.466063        |
| 14       | 10   | -5891.18    | 306.478028   | -29.83  | 93.25  | 0.304263        |
| 15       | 10   | -6014.26    | 285.24903    | -123.08 | 286.41 | 1.00407         |
| 16       | 10   | -5850.93    | 306.721405   | 163.33  | —      | —               |

870

871

872

873

874

875

876

877

878

879

880

881

882 **Table S7d. Proportions of total variance explained by the 32 principal components**  
883 **identified from principal components analysis of North American *Castanea* samples.** The 32  
884 principal components combined explain 56.5% of the total variance.

| Principal components | Proportion variance |
|----------------------|---------------------|
| PC1                  | 0.10957356          |
| PC2                  | 0.02748213          |
| PC3                  | 0.02287274          |
| PC4                  | 0.0209522           |
| PC5                  | 0.02088753          |
| PC6                  | 0.01773292          |
| PC7                  | 0.01741902          |
| PC8                  | 0.01648643          |
| PC9                  | 0.01636512          |
| PC10                 | 0.01508126          |
| PC11                 | 0.01485904          |
| PC12                 | 0.01454827          |
| PC13                 | 0.01430424          |
| PC14                 | 0.01416125          |
| PC15                 | 0.01406701          |
| PC16                 | 0.01339484          |
| PC17                 | 0.01296989          |
| PC18                 | 0.01289406          |
| PC19                 | 0.0127412           |
| PC20                 | 0.01270266          |
| PC21                 | 0.01257472          |
| PC22                 | 0.01237297          |
| PC23                 | 0.01229619          |
| PC24                 | 0.01221846          |
| PC25                 | 0.01204935          |
| PC26                 | 0.01201129          |
| PC27                 | 0.01188767          |
| PC28                 | 0.01183929          |
| PC29                 | 0.01173212          |
| PC30                 | 0.0116869           |
| PC31                 | 0.01160848          |
| PC32                 | 0.01147692          |

885

886

887
